1 **Sox2 and FGF20 interact to regulate organ of Corti hair cell and supporting cell**  
2 **development in a spatially-graded manner**

3

4 Short title: Sox2 and FGF20 in cochlea development

5

6 Lu M. Yang<sup>1</sup>, Kathryn S.E. Cheah<sup>2</sup>, Sung-Ho Huh<sup>1,3,\*</sup>, David M. Ornitz<sup>1,\*</sup>

7

8 <sup>1</sup>Department of Developmental Biology; Washington University School of Medicine; St. Louis,  
9 Missouri, 63110; USA

10 <sup>2</sup>School of Biomedical Sciences; The University of Hong Kong; Pokfulam, Hong Kong, China

11 <sup>3</sup>Holland Regenerative Medicine Program, and the Department of Neurological Sciences;  
12 University of Nebraska Medical Center; Omaha, Nebraska, 68198; USA

13 \*Corresponding authors

14 Email: [dornitz@wustl.edu](mailto:dornitz@wustl.edu) (D.M.O.), [sungho.huh@unmc.edu](mailto:sungho.huh@unmc.edu) (S.H.)

15

16 **Author contributions**

17

18 Conceptualization, L.M.Y., S.H., and D.M.O.; Methodology, L.M.Y., S.H., and D.M.O.; Formal  
19 Analysis, L.M.Y. and S.H.; Investigation: L.M.Y. and S.H.; Resources: K.S.E.C., S.H., and  
20 D.M.O.; Writing – Original Draft: L.M.Y. and D.M.O.; Writing – Review & Editing: L.M.Y.,  
21 K.S.E.C., S.H., and D.M.O.; Supervision: D.M.O.; Funding Acquisition: S.H. and D.M.O.

## 22 **Abstract**

23

24 The mouse organ of Corti develops in two steps: progenitor specification and differentiation.  
25 Fibroblast Growth Factor (FGF) signaling is important in this developmental pathway, as  
26 deletion of FGF receptor 1 (*Fgfr1*) or its ligand, *Fgf20*, leads to the loss of hair cells and  
27 supporting cells from the organ of Corti. However, whether FGF20-FGFR1 signaling is required  
28 during specification or differentiation, and how it interacts with the transcription factor Sox2, also  
29 important for hair cell and supporting cell development, has been a topic of debate. Here, we  
30 show that while FGF20-FGFR1 signaling functions during progenitor differentiation, FGFR1 has  
31 an FGF20-independent, Sox2-dependent role in specification. We also show that a combination  
32 of reduction in Sox2 expression and *Fgf20* deletion recapitulates the *Fgfr1*-deletion phenotype.  
33 Furthermore, we uncovered a strong genetic interaction between *Sox2* and *Fgf20*, especially in  
34 regulating the development of hair cells and supporting cells towards the basal end and the  
35 outer compartment of the organ of Corti. To explain this genetic interaction and its effects on the  
36 basal end of the organ of Corti, we provide evidence that decreased Sox2 expression delays  
37 specification, which begins at the organ of Corti apex, while *Fgf20*-deletion results in premature  
38 onset of differentiation, which begins near the organ of Corti base. Thereby, *Sox2* and *Fgf20*  
39 interact to ensure that specification occurs before differentiation towards the cochlear base.  
40 These findings reveal an intricate developmental program regulating organ of Corti development  
41 along the basal-apical axis of the cochlea.

42

## 43 **Author summary**

44

45 The mammalian cochlea contains the organ of Corti, a specialized sensory epithelium populated  
46 by hair cells and supporting cells that detect sound. Hair cells are susceptible to injury by noise,

47 toxins, and other insults. In mammals, hair cells cannot be regenerated after injury, resulting in  
48 permanent hearing loss. Understanding genetic pathways that regulate hair cell development in  
49 the mammalian organ of Corti will help in developing methods to regenerate hair cells to treat  
50 hearing loss. Many genes are essential for hair cell and supporting cell development in the  
51 mouse organ of Corti. Among these are *Sox2*, *Fgfr1*, and *Fgf20*. Here, we investigate the  
52 relationship between these three genes to further define their roles in development.  
53 Interestingly, we found that *Sox2* and *Fgf20* interact to affect hair cell and supporting cell  
54 development in a spatially-graded manner. We found that cells toward the outer compartment  
55 and the base of the organ of Corti are more strongly affected by the loss of *Sox2* and *Fgf20*. We  
56 provide evidence that this spatially-graded effect can be partially explained by the roles of the  
57 two genes in the precise timing of two sequential stages of organ of Corti development,  
58 specification and differentiation.

59  
60

## 61 **Introduction**

62

63 The inner ear contains six sensory organs required for the senses of hearing and balance. The  
64 cochlea, a snail-like coiled duct, is the auditory organ. It contains specialized sensory epithelia,  
65 called the organ of Corti, composed of hair cells (HCs) and supporting cells (SCs). In mammals,  
66 this sensory epithelium is elegantly patterned, with one row of inner hair cells (IHCs) and three  
67 rows of outer hair cells (OHCs), separated by two rows of pillar cells forming the tunnel of Corti.  
68 Each row of OHCs is associated with a row of supporting cells called Deiters' cells. Here, we  
69 refer to pillar cells and Deiters' cells collectively as SCs.

70

71 Organ of Corti development has been described as occurring in two main steps: prosensory  
72 specification and differentiation [1]. During prosensory specification, proliferative progenitors at

73 the floor of the developing cochlear duct are specified and exit the cell cycle to form the  
74 postmitotic prosensory domain. Here, we define specification to be a process that makes  
75 progenitors competent to differentiate. We also use cell cycle exit as a marker for specified cells  
76 in the prosensory domain (prosensory cells). During differentiation, prosensory cells differentiate  
77 into both HCs and SCs [2]. Interestingly, cell cycle exit, marking the completion of specification,  
78 and initiation of differentiation occur in waves that travel in opposite directions along the length  
79 of the cochlear duct. At around embryonic day 12.5 (E12.5) in the mouse, progenitors begin to  
80 exit the cell cycle and express the cyclin-dependent kinase inhibitor CDKN1B ( $p27^{Kip1}$ ) in a wave  
81 that begins at the apex of the cochlea (the cochlear tip) and reaches the base of the cochlea by  
82 around E14.5 [3,4]. Afterwards, the specified prosensory cells begin differentiating into HCs and  
83 SCs in a wave that begins at the mid-base at around E13.5, and spreads quickly to the rest of  
84 the base and to the apex over the next few days [1]. Notably, while the basal end of the  
85 cochlear duct differentiates immediately after prosensory specification, the apical end has a  
86 longer time between specification and differentiation, providing a larger “temporal buffer” for  
87 apical development. The spiral ganglion, containing neurons synapsing to HCs, has been  
88 shown to be important for this delay in apical differentiation, via Sonic Hedgehog (SHH)  
89 signaling [5–8].

90  
91 The transcription factor *Sox2* is one of the earliest markers of prosensory cells [9,10]. Mice with  
92 specific *Sox2* hypomorphic mutations that affect inner ear expression have hearing impairment  
93 due to decreased HC and SC number, while mice with inner ear-specific *Sox2* null mutations  
94 are completely deaf and have no HCs or SCs [11,12]. Genetic experiments show that *Sox2* is  
95 both necessary and sufficient for prosensory specification. Absence of *Sox2* expression leads to  
96 the loss of *Cdkn1b* expression at E14, a marker for the prosensory domain [12], while ectopic  
97 *Sox2* expression in cochlear nonsensory epithelium can induce ectopic sensory patches [13–  
98 15].

99

100 The Fibroblast Growth Factor (FGF) signaling pathway also plays vital roles in organ of Corti  
101 development [16]. Studies utilizing cochlear explants showed that inhibition of FGF signaling  
102 prior to and during stages of HC and SC differentiation results in decreased HC and SC number  
103 [17]. Signaling through FGF receptor 1 (FGFR1), in particular, is essential during this process.  
104 Conditional deletion of *Fgfr1* (Fgfr1-CKO) in the developing cochlear epithelium resulted in  
105 dramatically reduced HC and SC number [18–20]. This has been attributed to decreased *Sox2*  
106 expression in the prosensory domain of Fgfr1-CKO mice, leading to a defect in prosensory  
107 specification [19].

108

109 FGF20 has been hypothesized to be the FGFR1 ligand during organ of Corti development. Both  
110 *in vitro* inhibition of FGF20 with an anti-FGF20 antibody [17] and *in vivo* knockout of *Fgf20*  
111 (Fgf20-KO) [21] led to decreased HC and SC number, similar to the Fgfr1-CKO phenotype.  
112 However, the Fgf20-KO phenotype is clearly not as severe as that of Fgfr1-CKO. Almost all  
113 OHCs and some IHCs are missing in Fgfr1-CKO mice [19], while only 2/3 of OHCs are missing  
114 in Fgf20-KO mice, without any loss of IHCs [21]. This suggests that another FGF ligand may be  
115 redundant with and compensating for the loss of FGF20, the identity of which is currently  
116 unknown.

117 Another difference between Fgfr1-CKO and Fgf20-KO mice is the proposed mechanism  
118 accounting for the decrease in HCs and SCs. Interestingly, unlike in Fgfr1-CKO mice, *Sox2*  
119 expression in the prosensory domain is not disrupted in Fgf20-KO mice [19,21]. Rather, FGF20  
120 seems to function during HC and SC differentiation. These differences between the Fgfr1-CKO  
121 and Fgf20-KO phenotypes and their relationship with *Sox2* suggest that FGF20/FGFR1  
122 signaling has a more complex and as yet unexplained role during organ of Corti development.

123

124 Here, we hypothesize that FGFR1 signaling has functions in both steps of organ of Corti  
125 development: an earlier role in prosensory specification that involves *Sox2*, and a later role in  
126 the initiation of differentiation. We provide evidence that FGF20 regulates differentiation but not  
127 specification. Moreover, while *Fgfr1* functions upstream of *Sox2*, *Fgf20* is downstream of *Sox2*.  
128 We further show that *Sox2* and *Fgf20* genetically interact during organ of Corti development.  
129 Interestingly, downregulation of both genes leads to the loss of hair cells and supporting cells  
130 preferentially towards the outer compartment and the basal end of the cochlear duct. To explain  
131 the more severe basal phenotype, we provide evidence that *Sox2* regulates the timing of  
132 prosensory specification, while *Fgf20* regulates the timing of differentiation. As these two steps  
133 occur along a developmental pathway, we hypothesize that prosensory specification must occur  
134 prior to differentiation. In *Sox2* hypomorphic mice, prosensory specification is delayed, while in  
135 *Fgf20*-KO mice, onset of differentiation occurs prematurely. When combined, these two defects  
136 led to differentiation attempting to initiate prior to the completion of specification towards the  
137 basal end of the cochlear duct. These results define unique functions of and complex  
138 interactions among FGF20, FGFR1, and *Sox2* during organ of Corti development and highlight  
139 the potential importance of the timing of specification and differentiation along different regions  
140 of the cochlear duct.

141

## 142 **Results**

143

### 144 **The *Fgf20*-KO cochlear phenotype is less severe than the *Fgfr1*-CKO phenotype**

145

146 Previous studies showed that deletion of *Fgf20* leads to a loss of two thirds of OHCs in the  
147 mouse organ of Corti [21], while conditional deletion of *Fgfr1* from the cochlear epithelium leads  
148 to a loss of almost all OHCs and some IHCs [19,20]. To rule out the effect of genetic

149 background accounting for these differences, we generated *Fgf20* knockout (*Fgf20*-KO: *Fgf20*<sup>-/-</sup>)  
150 and *Fgfr1* conditional knockout (*Fgfr1*-CKO: *Foxg1*<sup>Cre/+</sup>; *Fgfr1*<sup>flox/-</sup>) mice along with littermate  
151 controls (*Fgf20*<sup>+/-</sup> for *Fgf20*-KO and *Fgfr1*<sup>flox/+</sup>, *Fgfr1*<sup>flox/-</sup>, and *Foxg1*<sup>Cre/+</sup>; *Fgfr1*<sup>flox/+</sup> for *Fgfr1*-CKO)  
152 on a mixed C57BL/6J and 129X1/SvJ genetic background. *Fgf20*-KO and *Fgfr1*-CKO mice were  
153 generated in separate matings; therefore, some genetic background differences could persist.  
154 *Foxg1*<sup>Cre</sup> targets most of the otic vesicle as early as E9.5 [22] and has been used in other  
155 studies to conditionally delete *Fgfr1* [18–20]. In the *Fgf20*<sup>-</sup> allele, exon 1 of *Fgf20* is replaced by  
156 a sequence encoding a GFP-Cre fusion protein [18]. We also refer to this null allele as *Fgf20*<sup>Cre</sup>.

157

158 We examined the cochleae at P0 (Figs 1A and 1B) and quantified the length of the cochlear  
159 duct and the total number of IHCs, OHCs, and SCs (Figs 1C-1F), as well as the number of cells  
160 along the basal, middle, and apical turns of the cochlear duct (S1A-S1C Figs). Refer to Fig 1G  
161 for the positions of basal, middle, and apical turns along the cochlear duct. We identified HCs  
162 based on Phalloidin labeling and SCs based on Prox1/Sox2 labeling. IHCs and OHCs were  
163 distinguished based on location relative to p75NTR-labeled inner pillar cells (IHCs are neural, or  
164 towards the center of the coiled duct; OHCs are abneural).

165

166 In both *Fgf20*-KO and *Fgfr1*-CKO cochleae, there were gaps in the sensory epithelium that  
167 lacked HCs and SCs along the entire cochlear duct. Quantitatively, *Fgf20*-KO cochleae had a  
168 6% reduction in cochlear length compared to control (*Fgf20*<sup>+/-</sup>) cochleae, while *Fgfr1*-CKO  
169 cochleae had a 28% reduction compared to control (*Fgfr1*<sup>Cre/+</sup>; *Fgfr1*<sup>flox/+</sup>). *Fgf20*-KO did not have  
170 a significant reduction in the number of IHCs, while *Fgfr1*-CKO cochleae had a 40% reduction.  
171 *Fgf20*-KO cochleae only had a 76% reduction in the number of OHCs, while *Fgfr1*-CKO  
172 cochleae had almost a complete lack of OHCs, a 97% reduction. For SCs, *Fgf20*-KO cochleae  
173 had a 59% reduction, while *Fgfr1*-CKO cochleae had an 84% reduction. These patterns  
174 persisted when HC and SC numbers were normalized to cochlear length. These results were all

175 consistent with previous studies [19,21] and showed that the Fgfr1-CKO phenotype is more  
176 severe than the Fgf20-KO phenotype in cochlear length and in the number of HCs and SCs. We  
177 hypothesize that during organ of Corti development, an additional FGFR1 ligand compensates  
178 for the loss of FGF20.

179  
180 Notably, while the total number of IHCs was decreased in Fgfr1-CKO cochleae, the decrease  
181 was only observed in the basal and middle turns of the cochlea, not in the apical turn (S1A Fig).  
182 In addition, the number of IHCs normalized to cochlear length was slightly increased in Fgf20-  
183 KO cochleae (Fig 1D), and this increase was only prominent in the middle and apical turns of  
184 the cochlea, but not in the basal turn (S1A Fig). The increase in IHCs could be explained by the  
185 shortened cochlear duct length in Fgf20-KO mice. No such basal/middle/apical turn  
186 discrepancies existed in the number of OHCs or SCs in either genotype (S1B and S1C Figs).

187  
188 Our previous studies also noted that the apical tip of Fgf20-KO cochleae has delayed  
189 differentiation relative to control at E16.5 and P0, but catches up by P7 [21]. We confirmed this  
190 result, finding that at P0 in control cochleae, sensory epithelium at the apical tip has begun to  
191 differentiate, based on phalloidin and p75NTR expression, while in Fgf20-KO cochleae, there  
192 was no sign of differentiation at the apical tip. There was a similar delay in differentiation at the  
193 apical tip of Fgfr1-CKO cochleae relative to control (S1E Fig). Refer to S1D Fig for the location  
194 of the apical tip.

195

## 196 **FGFR1 but not FGF20 regulates Sox2 expression**

197

198 Next, we examined Sox2 expression in Fgf20-KO and Fgfr1-CKO cochleae at E14.5 by RNA in  
199 situ hybridization and immunofluorescence. In control cochleae, Sox2 mRNA and protein were  
200 highly expressed in the prosensory domain (Fig 2A, refer to Fig 2C). The expression of Sox2



201 was not changed in *Fgf20*-KO cochleae compared to control; however, it was noticeably  
202 decreased in *Fgfr1*-CKO cochleae (Fig 2A), in agreement with previous findings [19–21]. This  
203 indicates that FGFR1 has an additional role, independent of FGF20, in regulating *Sox2*, which is  
204 required for prosensory specification [12]. Similar to *Sox2*, *CDKN1B* expression in the  
205 prosensory domain is also regulated by FGFR1, but not by FGF20 [18,19,21]. We confirmed  
206 these results, finding that while *CDKN1B* expression was not changed in *Fgf20*-KO cochleae at  
207 E14.5 relative to control, it was dramatically downregulated in *Fgfr1*-CKO cochleae (Fig 2B).  
208 This is consistent with the role of *Sox2* in regulating *CDKN1B* expression [12]. We hypothesize  
209 that a yet unidentified FGF ligand (in addition to or independent of FGF20) signaling via FGFR1  
210 regulates *Sox2* expression (and therefore *CDKN1B* expression) during prosensory specification,  
211 while FGF20 signaling via FGFR1 regulates differentiation (Fig 2D).

212  
213 We also wanted to confirm that FGF20 signals to epithelial FGFR1 at around the initiation of  
214 differentiation. To do so, we examined the expression of *Etv4* (also known as *Pea3*) and *Etv5*  
215 (also known as *Erm*), two well-established downstream effectors of FGF signaling [23], by in situ  
216 hybridization. The expression of these two genes are downregulated with FGF signaling  
217 inhibition in E14 cochlear explants [17]. At E14.5, there were two domains of *Etv4* and *Etv5*  
218 expression in control cochleae: the prosensory domain and the outer sulcus (S2A Fig,  
219 brackets). The outer sulcus is the region of the cochlear epithelium abneural to the prosensory  
220 domain at E14.5. In *Fgf20*-KO cochleae, expression of both genes was not detected in the  
221 prosensory domain. In *Fgfr1*-CKO cochleae, expression of both genes was similarly not  
222 detected in the prosensory domain. Expression of *Etv4* and *Etv5* in the outer sulcus was not  
223 affected in *Fgf20*-KO and *Fgfr1*-CKO cochleae (S2A Fig). These results confirm that FGF20  
224 signals through epithelial FGFR1 to the prosensory domain.

225

226 Previous studies have also reported a decrease in proliferation in Kölliker's organ (neural to the  
227 prosensory domain, S2B Fig) in *Fgfr1*-CKO cochleae [20]. We replicated this result by  
228 examining EdU (5-ethynyl-2'-deoxyuridine) incorporation at E14.5. *Fgfr1*-CKO mice had a  
229 complete lack of EdU-incorporating Kölliker's organ cells, while *Fgf20*-KO mice did not show a  
230 decrease in EdU incorporation (S2B Fig). This finding is also consistent with an additional FGF  
231 ligand signaling via FGFR1, likely at an earlier stage. We do not know whether the proliferation  
232 defect in Kölliker's organ contributes to the reduction in HC and SC number in *Fgfr1*-CKO mice.  
233

### 234 **Genetic rescue of the *Fgf20*-KO phenotype suggests that FGF20 is required for** 235 **differentiation**

236  
237 We have previously shown that recombinant FGF9, which is biochemically similar to FGF20  
238 [23,24], is able to rescue the loss of HCs and SCs in *Fgf20*-KO explant cochleae [21].  
239 Interestingly, while treatment with FGF9 at E13.5 and E14.5 was able to rescue the *Fgf20*-KO  
240 phenotype, treatment at E15.5 was not. This temporal rescue specificity suggests that FGF20  
241 signaling is required for the initiation of HC and SC differentiation.  
242

243 To confirm the hypothesis that FGF20 is involved in differentiation and not specification (Fig  
244 2D), we sought to more accurately determine the temporal requirement of FGF20 signaling. To  
245 achieve this, we developed an *in vivo* genetic rescue model of the *Fgf20*-KO phenotype by  
246 ectopically expressing FGF9. We combined *Fgf20*<sup>Cre</sup> with the *Fgf20*<sup>βgal</sup> [21], *ROSA*<sup>rtTA</sup> [25] and  
247 TRE-Fgf9-IRES-eGfp [26] alleles to generate *Fgf20*-rescue (*Fgf20*<sup>Cre/βgal</sup>; *ROSA*<sup>rtTA/+</sup>; TRE-Fgf9-  
248 IRES-eGfp) mice along with littermate controls: *Fgf20*-het (*Fgf20*<sup>Cre/+</sup>; *ROSA*<sup>rtTA/+</sup>), *Fgf9*-OA  
249 (*Fgf20*<sup>Cre/+</sup>; *ROSA*<sup>rtTA/+</sup>; TRE-Fgf9-IRES-eGfp), and *Fgf20*-null (*Fgf20*<sup>Cre/βgal</sup>; *ROSA*<sup>rtTA/+</sup>). These  
250 mice express the reverse tetracycline transactivator (rtTA) in the *Fgf20*<sup>Cre</sup> lineage, which

251 contains the prosensory domain and Kölliker's organ at E13.5 to E15.5 [18]. In mice expressing  
252 TRE-Fgf9-IRES-eGfp, rtTA drives the expression of FGF9 upon doxycycline (Dox) induction.  
253 The *Fgf20*<sup>*βgal*</sup> allele is another *Fgf20*-null allele, in which exon 1 of *Fgf20* is replaced by a  
254 sequence encoding β-galactosidase. We combined *Fgf20*<sup>*Cre*</sup> with *Fgf20*<sup>*βgal*</sup> to generate  
255 homozygous mutant mice while maintaining a constant dosage of *Fgf20*<sup>*Cre*</sup> in control and  
256 knockouts.

257  
258 Initially, pregnant dams were fed a Dox diet from E13.5 to E15.5 and pups were harvested at P0  
259 to examine HC and SC development. As expected, Dox treatment itself did not appear to affect  
260 HC or SC development in *Fgf20*-het and *Fgf20*-null cochleae, both of which showed the  
261 expected phenotypes (Figs 3A and 3B). Ectopic expression of FGF9 during these stages also  
262 did not affect HC or SC development in *Fgf9*-OA cochleae, showing that excess FGF20/FGF9  
263 was not sufficient to produce ectopic HCs and SCs. Importantly, ectopic expression of FGF9  
264 resulted in a full rescue of the number and patterning of HCs and SCs in *Fgf20*-rescue pups.  
265 The organ of Corti in these rescue pups had one row of IHCs, three rows of OHCs, and five  
266 rows of SCs throughout the entire length of the cochlear duct, without any gaps (Figs 3A and  
267 3B). This shows that FGF20/FGF9 signaling at E13.5-E15.5 is sufficient for HC and SC  
268 differentiation. The quantified results from all of the rescue experiments are summarized in Fig  
269 3C, where the number of OHCs and SCs are represented as a percentage of that of *Fgf20*-het  
270 mice treated with the same Dox regimen. All of the quantified data are presented in S3 Fig.

271  
272 To more precisely determine the timing of rescue sufficiency, we fed pregnant dams Dox for a  
273 period of 24 hours starting at E13.5, E14.5, or E15.5. With E13.5 Dox, patterning and OHC  
274 number in the basal turn of the cochlea were completely rescued (Fig 3A). However, OHC  
275 number in the middle and particularly the apical turns were only partially rescued, resulting in  
276 regions with two rows of OHCs instead of three. For instance, in the apical turn, OHC number

277 was restored to 81% of Fgf20-het mice, which is statistically significantly increased compared to  
278 Fgf20-null, but also statistically significantly decreased compared to Fgf20-het, indicating partial  
279 rescue (Fig 3C). With E14.5 Dox, patterning and OHC number in the middle and apical turns  
280 were completely rescued. However, OHC number in the basal turn was not completely rescued,  
281 with regions of one or two rows of OHCs, instead of three. With E15.5 Dox, patterning and OHC  
282 number was not rescued in the basal and middle turns, as gaps still formed between islands of  
283 HCs (Fig 3A). However, OHC number in the apical turn was partially rescued, with two or three  
284 rows of OHCs not separated by gaps towards the tip of the apex. In all of these experiments,  
285 the rescue of SCs followed the same pattern as that of OHCs (Fig 3B).

286  
287 These rescue results show that FGF20/FGF9 is sufficient for OHC and SC differentiation in the  
288 basal turn of the cochlea at E13.5, in the middle and apical turns at E14.5-E15.5, and in the tip  
289 of the apical turn at E15.5. Since the initiation of HC and SC differentiation occurs in the  
290 base/mid-base of the cochlea at E13.5 and progresses apically over the next few days, these  
291 results strongly imply that FGF20 functions during the initiation of differentiation, rather than  
292 prosensory specification, consistent with our model (Fig 2D).

293  
294 **Decrease in Sox2 expression results in similar phenotypes as disruptions to**  
295 **FGFR1 signaling**

296  
297 Our results and previous findings suggest that FGFR1 regulates prosensory specification via  
298 Sox2 [19]. Mice with an inner ear-specific Sox2 hypomorphic mutation ( $Sox2^{Ysb/Ysb}$ , see below)  
299 have defects in prosensory specification, accounting for a small loss of HCs and SCs, whereas  
300 mice with inner-ear specific Sox2 null mutations have a complete lack of prosensory  
301 specification and a complete absence of sensory epithelium [12]. To examine how much the

302 reduction in *Sox2* expression in *Fgfr1*-CKO cochlea contributes to the phenotype at P0, we  
303 combined the *Sox2*<sup>-</sup> (*Sox2* constitutive null) and *Sox2*<sup>Ysb</sup> alleles to closely examine the effects of  
304 reduction in *Sox2* expression on organ of Corti development, on a similar genetic background  
305 as our *Fgf20*-KO and *Fgfr1*-CKO mice. We hypothesized that if *Fgfr1* acts upstream of *Sox2*,  
306 then reducing *Sox2* expression should at least partially recapitulate the *Fgfr1*-CKO cochlea  
307 phenotype. The *Sox2*<sup>Ysb</sup> allele is a regulatory mutant in which transgene insertion in  
308 chromosome 3 disrupts some otic enhancers, resulting in hypomorphic *Sox2* expression in the  
309 inner ear [11,12].

310  
311 We generated a *Sox2* allelic series of mice with the following genotypes, in order of highest to  
312 lowest levels of *Sox2* expression: *Sox2*<sup>+/+</sup> (wildtype), *Sox2*<sup>Ysb/+</sup>, *Sox2*<sup>Ysb/Ysb</sup>, and *Sox2*<sup>Ysb/-</sup>. In this  
313 allelic series, decrease in *Sox2* expression had a dose-dependent effect on cochlea length at  
314 P0 (Figs 4A-4C). *Sox2*<sup>Ysb/+</sup> cochleae had a 6% reduction in length compared to wildtype  
315 (although not statistically significant), *Sox2*<sup>Ysb/Ysb</sup> cochleae had a 24% reduction, and *Sox2*<sup>Ysb/-</sup>  
316 had a 46% reduction. *Sox2*<sup>Ysb/+</sup> organ of Corti developed relatively normally, with three rows of  
317 OHCs and one row of IHCs (Fig 4A). Interestingly, there were occasional ectopic IHCs medial  
318 (neural) to the normal row of IHCs, especially in the middle and apical turns of the *Sox2*<sup>Ysb/+</sup>  
319 cochlea (Fig 4A, arrowheads). However, there was no significant increase in IHC number (total  
320 or normalized to length) compared to wildtype cochleae (Fig 4D). The *Sox2*<sup>Ysb/Ysb</sup> cochlea  
321 appeared much more abnormal, with gaps in the sensory epithelium that lacked HCs and SCs  
322 in the basal turn (Figs 4A and 4B), similar to what was observed previously [12]. Moreover, at  
323 the base, in the sensory islands between the gaps, there were often four rows of OHCs and six  
324 rows of SCs. In the middle and apical turns, there were the normal three rows of OHCs and five  
325 rows of SCs. There were also numerous ectopic IHCs throughout the middle and apical turns,  
326 sometimes forming an entire second row of cells (Fig 4A), resulting in increased number of IHCs  
327 in the middle turn compared to wildtype (S4A Fig). However, the total and length-normalized

328 number of IHCs in  $Sox2^{Ysb/Ysb}$  cochleae did not significantly differ from that of wildtype cochleae  
329 (Fig 4D). In terms of OHCs,  $Sox2^{Ysb/Ysb}$  cochleae exhibited a 40% decrease in total number  
330 compared to wildtype cochleae (Fig 4E). This decrease was not quite as severe when  
331 normalized to cochlear length (21% decrease). Strikingly,  $Sox2^{Ysb/-}$  cochleae lacked almost all  
332 HCs and SCs, except in the apical turn (Figs 4A and 4B). The decrease in OHC number (93%)  
333 in  $Sox2^{Ysb/-}$  cochleae compared to wildtype was more severe than the decrease in IHC number  
334 (75%). Notably, IHC number was significantly decreased in the basal and middle turns, but not  
335 in the apical turn (S4A Fig). OHC number was significantly decreased throughout all three turns  
336 (S4B Fig). In all of these genotypes, the number of SCs followed the pattern of loss of OHCs  
337 (Fig 4F and S4C Fig). Interestingly, while  $Sox2^{Ysb/-}$  cochleae almost completely lacked HCs and  
338 SCs in the basal and middle turns, in 7 of 11  $Sox2^{Ysb/-}$  cochleae examined, one or two small  
339 islands of HCs or SCs were found at the basal tip (S4D Fig).

340  
341 Overall, these results showed that the basal end of the cochlea is more sensitive to the loss of  
342  $Sox2$  expression than the apical end. Furthermore, while both IHCs and OHCs were affected,  
343 OHCs were more sensitive to decrease in  $Sox2$  expression than IHCs. Importantly, both of  
344 these features were found in  $Fgfr1$ -CKO cochleae, where the decrease in IHCs was only found  
345 in the basal and middle turns and there were almost no OHCs along the entire cochlear duct  
346 (S1A and S1B Fig). Therefore, we conclude that decrease in  $Sox2$  expression, leading to  
347 defects in prosensory specification, could account for the  $Fgfr1$ -CKO phenotype. Furthermore,  
348 the decrease in  $Sox2$  expression could also account for the difference in severity between the  
349  $Fgf20$ -KO and  $Fgfr1$ -CKO phenotypes, since  $Fgf20$ -KO cochleae, which had normal  $Sox2$   
350 expression, did not have a decrease in the number of IHCs, unlike  $Fgfr1$ -CKO and  $Sox2^{Ysb/-}$   
351 cochleae.

352

353 **Decrease in levels of Sox2 expression delays prosensory specification**

354

355 We sought to determine why a decrease in Sox2 expression more severely affected the basal  
356 end of the cochlear duct. Initially, we examined Sox2 expression at E14.5. As expected, Sox2  
357 expression was almost completely absent in Sox2<sup>Ysb/-</sup> cochleae (S5A Fig). This decrease in  
358 expression was not more severe at the basal turn of the cochlear duct, relative to the middle  
359 and apical turns, suggesting that the more severe basal phenotype in Sox2<sup>Ysb/-</sup> cochleae cannot  
360 be explained by differential Sox2 expression. Similarly, CDKN1B expression was downregulated  
361 in the prosensory domain of Sox2<sup>Ysb/-</sup> cochleae, consistent with previous studies [12].

362 Interestingly, the decrease in expression was also not more severe at the basal turn relative to  
363 the middle and apical turns (S5B Fig). Using CDKN1B as a marker of prosensory specification,  
364 this suggests that the more severe basal phenotype also cannot be explained by differential  
365 regulation of prosensory specification along the length of the cochlea.

366

367 As described in the introduction, waves of cell cycle exit (marking the completion of prosensory  
368 specification) and initiation of differentiation travel in opposite directions along the cochlear duct  
369 during development, resulting in the basal end of the cochlear duct differentiating immediately  
370 after specification. The apical end, meanwhile, exhibits a delay in differentiation, resulting in a  
371 longer temporal buffer between specification and differentiation. In this developmental pathway,  
372 specification must be completed prior to the initiation of differentiation. We reasoned, therefore,  
373 that disruptions to the timing of prosensory specification will preferentially interfere with basal  
374 sensory epithelia development, potentially accounting for the more severe basal phenotype in  
375 Sox2 hypomorphs.

376

377 To test this hypothesis, we examined cell cycle exit in the prosensory domain via Ki67  
378 expression, as a marker of the status of prosensory specification. Ki67 is expressed by cycling

379 cells, but not cells in G<sub>0</sub> [27]. In the developing cochlea at around E12.5 to E15.5, cells of the  
380 prosensory domain, sometimes referred to as the zone of non-proliferation, have turned off or  
381 are beginning to turn off Ki67 [3]. At E14.5 in *Sox2<sup>Ysb/+</sup>* cochleae, the prosensory domain along  
382 most of the cochlear duct (serial sections 2-6) has turned off Ki67 expression, except at the very  
383 base (serial section 1; Fig 5A, brackets). See graphical summary below Fig 5A; also see S5C  
384 Fig for serial “mid-modiolar” sections through the cochlea. This indicates that the wave of cell  
385 cycle exit, which starts at the apex, has reached the very base of the cochlear duct. However, in  
386 *Sox2<sup>Ysb/-</sup>* cochleae, only the prosensory domain at the apical turn of the cochlear duct (serial  
387 section 6) has turned off Ki67, not at the mid-basal or basal turns (serial sections 1-3); the  
388 middle turns (serial sections 4 and 5), meanwhile, were just starting to turn off Ki67 (Fig 5A,  
389 brackets). This indicates that cell cycle exit has only reached the middle turn, suggesting a  
390 delay in prosensory specification. In addition, the nuclei of prosensory domain cells shift away  
391 from the luminal surface of the cochlear epithelium upon specification [28]. This basal shift of  
392 nuclei localization within the cell leaves a blank space between DAPI-stained nuclei and the  
393 luminal surface of the cochlear duct, which can be visualized in all six serial sections in *Sox2<sup>Ysb/+</sup>*  
394 cochleae at E14.5 (Fig 5A, asterisks). However, in *Sox2<sup>Ysb/-</sup>* cochleae, cells of the prosensory  
395 domain mostly did not exhibit this nuclei shift at E14.5.

396  
397 At E15.5, the prosensory domain along the entire length of the cochlear duct has turned off Ki67  
398 expression in both *Sox2<sup>Ysb/+</sup>* and *Sox2<sup>Ysb/-</sup>* cochleae (Fig 5A, brackets), indicating that  
399 prosensory specification in *Sox2<sup>Ysb/-</sup>* cochleae has caught up by this stage. Prosensory nuclei  
400 localization has also begun to catch up at E15.5 in *Sox2<sup>Ysb/-</sup>* cochleae (Fig 5A, asterisks).  
401 Overall, these results suggest that prosensory specification is delayed in *Sox2<sup>Ysb/-</sup>* cochleae, but  
402 not permanently disrupted.

403



404 By definition, prosensory specification must occur prior to differentiation to generate HCs and  
405 SCs. Therefore, the period of time in between cell cycle exit and the initiation of differentiation  
406 represents a temporal buffer (Fig 5B, green shading) preventing differentiation from initiating  
407 prior to specification. As differentiation begins in the basal/mid-basal cochlear turns shortly after  
408 specification, the delay in specification in *Sox2<sup>Ysb/-</sup>* cochleae leads to progenitors not having  
409 been specified in time for differentiation at the basal end of the cochlear duct (Fig 5B,  
410 crosshatch pattern). We propose that this at least partially explains why the basal end of the  
411 cochlea is more sensitive to decreases in the level of *Sox2* expression. Moreover, since  
412 differentiation begins in the mid-base and spreads to the rest of the base and apex, progenitors  
413 at the basal tip in *Sox2<sup>Ysb/-</sup>* cochleae may still undergo specification prior to differentiation. This  
414 may explain why small islands of HCs and SCs are sometimes seen in the basal tip of *Sox2<sup>Ysb/-</sup>*  
415 cochleae (S4D Fig).

416

### 417 ***Sox2* is upstream of *Fgf20***

418

419 While the delay in prosensory specification can explain the preferential loss of sensory  
420 epithelium from the basal end of *Sox2* hypomorph cochleae, it does not readily explain the  
421 preferential loss of OHCs, relative to IHCs. Since this preference for OHC loss is reminiscent of  
422 the *Fgf20/Fgfr1* deletion phenotypes, we investigated the possibility that *Sox2* may be upstream  
423 of FGF20-FGFR1 signaling. Interestingly, both *Etv4* and *Etv5* were dramatically downregulated  
424 in the prosensory domain of *Sox2<sup>Ysb/-</sup>* cochleae compared to control (Fig 6A). This shows that  
425 FGF20-FGFR1 signaling was disrupted in the *Sox2* hypomorph cochleae. Examination of *Fgfr1*  
426 and *Fgf20* expression by in situ hybridization revealed that while *Fgfr1* expression did not  
427 appear to be affected in *Sox2<sup>Ysb/-</sup>* cochleae at E14.5, *Fgf20* expression was absent (Fig 6B).  
428 This suggests that while *Fgfr1* functions upstream of *Sox2*, *Fgf20* is downstream of *Sox2*. This

429 model predicts that *Fgf20* expression would be downregulated in *Fgfr1*-CKO cochleae, which  
430 was confirmed by in situ hybridization (Fig 6C).

431  
432 The above results indicate that the loss of *Fgf20* could partially account for the *Sox2*<sup>*Ysb/-*</sup>  
433 phenotype. To determine whether loss of *Fgf20* also causes delayed prosensory specification,  
434 we examined Ki67 expression in *Fgf20*-KO cochleae. At E14.5, there was no detectable delay in  
435 cell cycle exit in *Fgf20*-KO cochleae, as loss of Ki67 expression reached the base (serial section  
436 1) in both control and *Fgf20*-KO cochleae (Fig 6D, brackets). See S6A Fig for serial “mid-  
437 modiolar” sections through the cochlea. There was also no detectable delay in prosensory basal  
438 nuclei shift in *Fgf20*-KO cochleae (Fig 6D, asterisks). These results were expected as the  
439 *Fgf20*-KO phenotype is not more severe at the basal end of the cochlear duct. This is also  
440 consistent with *Fgf20* being required during differentiation rather than prosensory specification  
441 (Fig 2D). However, these results do not answer whether and how the loss of *Fgf20* contributes  
442 to the *Sox2* hypomorph phenotype.

443  
444 We also asked whether decrease in *Sox2* expression can account for the absence of  
445 proliferation in Kölliker’s organ of *Fgfr1*-CKO cochleae. Interestingly, EdU-incorporation was  
446 decreased in Kölliker’s organ in *Sox2*<sup>*Ysb/-*</sup> cochleae at E14.5, especially in the region adjacent to  
447 the prosensory domain (S6B Fig, bracket). However, EdU-incorporation was not completely  
448 absent from Kölliker’s organ, unlike in *Fgfr1*-CKO cochleae. This suggests that loss of *Sox2* in  
449 combination with other factors contributes to Kölliker’s organ phenotype in *Fgfr1*-CKO cochleae.

450

### 451 ***Sox2* and *Fgf20* interact during cochlea development**

452

453 To explore how the loss of *Fgf20* contributes to the *Sox2* hypomorph phenotype, we combined  
454 the *Fgf20*<sup>-</sup> and *Sox2*<sup>*Ysb*</sup> alleles to generate *Fgf20* and *Sox2* compound mutants. We also

455 hypothesized that reducing Sox2 expression in Fgf20-KO mice would recapitulate (or  
456 phenocopy) the more severe Fgfr1-CKO phenotype. We interbred F1 mice from the same  
457 parents to generate nine different F2 genotypes encompassing all possible combinations of the  
458 *Fgf20*<sup>-/-</sup> and Sox2<sup>Ysb</sup> alleles: *Fgf20*<sup>+/+</sup>;Sox2<sup>+/+</sup>, *Fgf20*<sup>+/+</sup>;Sox2<sup>Ysb/+</sup>, *Fgf20*<sup>+/-</sup>;Sox2<sup>+/+</sup>,  
459 *Fgf20*<sup>+/-</sup>;Sox2<sup>Ysb/+</sup>, *Fgf20*<sup>+/-</sup>;Sox2<sup>Ysb/Ysb</sup>, *Fgf20*<sup>-/-</sup>;Sox2<sup>+/+</sup>, *Fgf20*<sup>-/-</sup>;Sox2<sup>Ysb/+</sup>,  
460 and *Fgf20*<sup>-/-</sup>;Sox2<sup>Ysb/Ysb</sup> (Figs 7A and 7B and data not shown). At P0, an overview of HCs and  
461 SCs showed that the *Fgf20*<sup>+/-</sup>;Sox2<sup>Ysb/+</sup> phenotype mostly resembled that of *Fgf20*<sup>+/+</sup>;Sox2<sup>+/+</sup>,  
462 *Fgf20*<sup>+/+</sup>;Sox2<sup>Ysb/+</sup>, and *Fgf20*<sup>+/-</sup>;Sox2<sup>+/+</sup> cochleae, except for the prevalence of ectopic IHCs (Fig  
463 7A, arrowheads). The *Fgf20*<sup>+/-</sup>;Sox2<sup>Ysb/Ysb</sup> phenotype mostly resembled that of  
464 *Fgf20*<sup>+/+</sup>;Sox2<sup>Ysb/Ysb</sup> cochleae, but with more gaps in the basal cochlear turn and two rows of  
465 IHCs throughout the length of the cochlear duct, except where there were gaps. The *Fgf20*<sup>-/-</sup>  
466 *;Sox2*<sup>Ysb/+</sup> phenotype mostly resembled that of *Fgf20*<sup>-/-</sup>;Sox2<sup>+/+</sup> cochleae, but with smaller  
467 sensory islands in between gaps. The *Fgf20*<sup>-/-</sup>;Sox2<sup>Ysb/Ysb</sup> phenotype appeared by far the most  
468 severe, with almost a complete absence of IHCs, OHCs, and SCs from the basal turn, and tiny  
469 sensory islands in the middle turn; however, the apical turn appeared similar to that of *Fgf20*<sup>-/-</sup>  
470 *;Sox2*<sup>Ysb/+</sup> and *Fgf20*<sup>-/-</sup>;Sox2<sup>+/+</sup> cochleae (Figs 7A and 7B).

471  
472 Quantification of the phenotypes are presented in Figs 8B-8E and S7B-S7D Figs. We analyzed  
473 the quantified P0 phenotype via two-way ANOVA with the two factors being gene dosage of  
474 *Fgf20* (levels: *Fgf20*<sup>+/+</sup>, *Fgf20*<sup>+/-</sup>, *Fgf20*<sup>-/-</sup>) and Sox2 (levels: Sox2<sup>+/+</sup>, Sox2<sup>Ysb/+</sup>, Sox2<sup>Ysb/Ysb</sup>).  
475 Results from the two-way ANOVA and post-hoc Tukey's HSD are presented in Figs 8A, 8F, and  
476 S7A and S8 Figs. Cochlear length and the total number of IHCs, OHCs, and SCs were all  
477 significantly affected by both the *Fgf20* dosage and the Sox2 dosage, as well as an interaction  
478 between the two factors (Figs 8A-8E). The statistically significant interaction between *Fgf20* and  
479 Sox2 dosages suggests that *Fgf20* and Sox2 have a genetic interaction in regulating cochlear  
480 length as well as the number of IHCs, OHCs, and SCs (Fig 8A). Notably, *Fgf20*<sup>+/-</sup>;Sox2<sup>Ysb/Ysb</sup>

481 cochleae had significantly fewer OHCs and SCs than  $Fgf20^{+/+};Sox2^{Ysb/Ysb}$  cochleae, and  $Fgf20^{-/-};Sox2^{Ysb/+}$  cochleae had significantly fewer OHCs than  $Fgf20^{-/-};Sox2^{+/+}$  cochleae (Fig 8F).  
482  
483 Importantly,  $Fgf20^{-/-};Sox2^{Ysb/Ysb}$  cochleae had decreased total and length-normalized number of  
484 IHCs, which was not observed in any of the other genotypes, strongly supporting a genetic  
485 interaction between  $Fgf20$  and  $Sox2$  ( $Fgf20^{+/+};Sox2^{Ysb/Ysb}$  cochleae did have a slight decrease in  
486 the total number IHCs, but not in the length-normalized number of IHCs).  
487  
488 Interestingly, while the total number of IHCs was decreased in  $Fgf20^{-/-};Sox2^{Ysb/Ysb}$  cochleae  
489 relative to all other genotypes, this decrease was only found in the basal and middle turns, but  
490 not the apical turn (S7B and S8 Figs). No such basal/middle/apical turn discrepancies existed in  
491 the number of OHCs or SCs (S7C, S7D, and S8 Figs). This is reminiscent of the  $Fgfr1$ -CKO and  
492  $Sox2^{Ysb/-}$  phenotypes.  
493  
494 To ensure that the  $Fgf20^{-}$  and  $Sox2^{Ysb}$  interaction is not purely an artifact of the  $Sox2^{Ysb}$  allele,  
495 we generated  $Fgf20^{+/+};Sox2^{+/+}$  (wildtype),  $Fgf20^{+/-};Sox2^{+/+}$  ( $Fgf20$ -het),  $Fgf20^{+/+};Sox2^{+/-}$  ( $Sox2$ -  
496 het), and  $Fgf20^{+/-};Sox2^{+/-}$  (double het) mice to look for an interaction between the  $Fgf20^{-}$  and  
497  $Sox2^{-}$  alleles (S9A Fig). At P0, cochlear length did not significantly differ among the four  
498 genotypes (S9B Fig). HC quantification showed that neither  $Fgf20$  nor  $Sox2$  exhibited  
499 haploinsufficiency for total or length-normalized number of IHCs or OHCs (S9C and S9D Figs).  
500 However, in  $Fgf20$ -het and much more so in  $Sox2$ -het cochleae, occasional ectopic IHCs can be  
501 found in the middle and apical turns of the cochlear duct (S9A Fig, arrowheads). Interestingly, in  
502 double het cochleae, many more ectopic IHCs were found, even in the basal turn. These  
503 ectopic IHCs led to an increase in the total and length-normalized number of IHCs in double het  
504 cochleae, compared to wildtype (S9C Fig). Notably, a significant increase in IHCs was only  
505 found in the basal turn, not the middle or apical turns (S9E Fig). In the basal turn, IHC number  
506 was significantly increased in double het cochleae compared to wildtype,  $Fgf20$ -het, and  $Sox2$ -

507 het cochleae. Double het cochleae also had a significant decrease in total and length-  
508 normalized number of OHCs compared to wildtype (S9D Fig). Again, a significant decrease in  
509 OHCs was only found in the basal turn, not the middle or apical turns (S9F Fig). These results  
510 confirm a genetic interaction between *Fgf20* and *Sox2*.

511

## 512 **Loss of *Fgf20* does not further delay prosensory specification in *Sox2***

### 513 **hypomorph cochleae**

514

515 We propose that the *Fgf20*<sup>-/-</sup>;*Sox2*<sup>Ysb/Ysb</sup> phenotype lies in between that of *Fgfr1*-CKO and  
516 *Sox2*<sup>Ysb/-</sup> in terms of severity of reductions in cochlear length and in the number of HCs and  
517 SCs. We further hypothesize that these three phenotypes form a continuum with the *Fgf20*-KO  
518 phenotype (Fig 9A). Along this continuum, all four genotypes lack FGF20 signaling, but vary in  
519 the level of *Sox2* expression and phenotype severity in the basal end of the cochlear duct and  
520 the outer compartment (outer rows of OHCs and SCs). From this, and from the *Fgf20*<sup>-</sup> and  
521 *Sox2*<sup>Ysb</sup> series of alleles, we conclude that the basal end of the cochlear duct and the outer  
522 compartment are more sensitive to the loss of *Fgf20* and *Sox2*, relative to the apical end and  
523 inner compartment, respectively.

524

525 To determine the mechanism underlying the *Sox2* and *Fgf20* interaction, we asked whether the  
526 similarity between the *Fgf20*<sup>-/-</sup>;*Sox2*<sup>Ysb/Ysb</sup> and *Sox2*<sup>Ysb/-</sup> phenotypes could be explained by a  
527 further decrease in *Sox2* levels in *Fgf20*<sup>-/-</sup>;*Sox2*<sup>Ysb/Ysb</sup> cochleae from *Sox2*<sup>Ysb/Ysb</sup> levels. In other  
528 words, we asked whether loss of *Fgf20* further reduces *Sox2* expression on a *Sox2*  
529 hypomorphic background. Examination of prosensory domain *Sox2* expression at E14.5  
530 revealed, as expected, that *Fgf20*<sup>-/-</sup>;*Sox2*<sup>Ysb/+</sup> cochleae did not have a decrease in *Sox2*  
531 expression compared to *Fgf20*<sup>+/-</sup>;*Sox2*<sup>Ysb/+</sup> (S10A Fig). *Fgf20*<sup>-/-</sup>;*Sox2*<sup>Ysb/Ysb</sup> cochleae also did not

532 have a further decrease in Sox2 expression compared to *Fgf20*<sup>+/-</sup>;*Sox2*<sup>Ysb/Ysb</sup> cochleae.  
533 Moreover, despite the loss of sensory epithelium in most of the basal turn, Sox2 expression was  
534 not further decreased in the basal turn at E14.5 relative to the rest of the *Fgf20*<sup>-/-</sup>;*Sox2*<sup>Ysb/Ysb</sup>  
535 cochlea (S10A Fig). These data confirm that *Fgf20* does not regulate Sox2 expression. A similar  
536 pattern of expression was observed for CDKN1B across the different genotypes (S10B Fig).  
537 Loss of *Fgf20* did not contribute to a further decrease in CDKN1B expression on a *Sox2*<sup>Ysb/Ysb</sup>  
538 background, nor was there a basal-apical difference in CDKN1B expression in *Fgf20*<sup>-/-</sup>;  
539 *Sox2*<sup>Ysb/Ysb</sup> cochleae at E14.5.

540

541 Next, we asked whether Sox2 and *Fgf20* interact to delay prosensory specification. We showed  
542 that *Fgf20*-KO cochleae do not exhibit a delay in prosensory specification (Fig 6D). However,  
543 this does not rule out the possibility that the loss of *Fgf20* on a Sox2 hypomorphic background  
544 may contribute to a delay. We examined Ki67 expression at E14.5 and found that in  
545 *Fgf20*<sup>+/-</sup>;*Sox2*<sup>Ysb/+</sup> cochleae, prosensory domain cell cycle exit has reached the end of the base  
546 (serial section 1; Fig 9B, brackets). See S10D Fig for serial “mid-modiolar” sections through the  
547 cochlea. Similarly, cell cycle exit in *Fgf20*<sup>-/-</sup>;*Sox2*<sup>Ysb/+</sup> cochleae also reached the very base. As  
548 expected, *Fgf20*<sup>+/-</sup>;*Sox2*<sup>Ysb/Ysb</sup> cochleae exhibited a slight delay in prosensory specification; cell  
549 cycle exit has reached the base (serial section 2), but has not yet reached the end of the base  
550 (serial section 1). Importantly, *Fgf20*<sup>-/-</sup>;*Sox2*<sup>Ysb/Ysb</sup> cochleae did not show a further delay relative  
551 to *Fgf20*<sup>+/-</sup>;*Sox2*<sup>Ysb/Ysb</sup>. There was also no detectable delay in basal nuclei shift in *Fgf20*<sup>-/-</sup>;  
552 *Sox2*<sup>Ysb/+</sup> or *Fgf20*<sup>-/-</sup>;*Sox2*<sup>Ysb/Ysb</sup> cochleae (Fig 9B, asterisks). These results suggest that the  
553 loss of *Fgf20* does not contribute to delayed specification and that the severity of the *Fgf20*<sup>-/-</sup>;  
554 *Sox2*<sup>Ysb/Ysb</sup> basal phenotype cannot be completely attributed to delayed specification.

555

556 Lastly, we examined proliferation in the *Fgf20*<sup>-/-</sup> and *Sox2*<sup>Ysb</sup> E14.5 cochleae. Interestingly, there  
557 was a noticeable decrease in the number of EdU-incorporating cells in Kölliker’s organ in *Fgf20*<sup>-/-</sup>

558  $^{-/-}; Sox2^{Ysb/Ysb}$  cochleae, compared to  $Fgf20^{+/-}; Sox2^{Ysb/+}$ ,  $Fgf20^{-/-}; Sox2^{Ysb/+}$ , and  $Fgf20^{+/-}; Sox2^{Ysb/Ysb}$   
559 cochleae (S10C Fig). This phenotype is similar to that of  $Sox2^{Ysb/-}$  cochleae and is less severe  
560 than that of  $Fgfr1$ -CKO cochleae. This suggests that  $Fgf20$  and  $Sox2$  interact to regulate  
561 proliferation in Kölliker's organ, although other factors downstream of  $Fgfr1$  also contribute.

562

### 563 **Fgf20-KO organ of Corti exhibits premature differentiation**

564

565 We showed that  $Fgf20$  likely plays a role during the initiation of differentiation. Previous studies  
566 showed that deletion of both transcription factors  $Hey1$  and  $Hey2$  results in premature  
567 differentiation in the organ of Corti [29]. Furthermore, it has been suggested that FGF signaling,  
568 in particular FGF20, regulates  $Hey1$  and  $Hey2$  expression during this process [8,29]. To test  
569 whether  $Fgf20$  is upstream of  $Hey1$  and  $Hey2$ , we looked at the expression of the two  
570 transcription factors via in situ hybridization. In  $Fgf20$ -KO cochleae at E14.5,  $Hey1$  expression is  
571 downregulated while  $Hey2$  is almost completely absent compared to control (Fig 10A). To test  
572 whether FGF20 loss leads to premature differentiation, we examined myosin VI ( $Myo6$ )  
573 expression, a marker of differentiated HCs [29]. At E14.5, the cochleae of 3 of 12 control  
574 embryos examined contained  $Myo6$ -expressing HCs, while the cochleae of 18 of 19 littermate  
575  $Fgf20$ -KO embryos contained  $Myo6$ -expressing HCs ( $p < 0.001$ , Fisher's exact test; Fig 10B). If  
576 present, the  $Myo6$ -expressing HCs at this stage were always found in the basal and mid-basal  
577 turns of the cochlea. These results show that there is premature onset of differentiation in  
578  $Fgf20$ -KO cochleae, which begins in the basal/mid-basal turns. This result is surprising given  
579 our previous finding of delayed differentiation in the apical end of  $Fgf20$ -KO cochleae at later  
580 stages, which we confirm here (S1E Fig). These findings suggest that apical progression of  
581 differentiation may be slower in  $Fgf20$ -KO cochleae.

582

583 Next, we asked whether ectopic activation of FGF signaling via overexpression of FGF9 will  
584 delay the onset of differentiation. We generated *Fgf20*-het (*Fgf20*<sup>Cre/+</sup>;*ROSA*<sup>rtTA/+</sup>), *Fgf20*-null  
585 (*Fgf20*<sup>Cre/βgal</sup>;*ROSA*<sup>rtTA/+</sup>), *Fgf9*-OA (*Fgf20*<sup>Cre/+</sup>;*ROSA*<sup>rtTA/+</sup>;TRE-*Fgf9*-IRES-eGfp), *Fgf20*-rescue  
586 (*Fgf20*<sup>Cre/βgal</sup>;*ROSA*<sup>rtTA/+</sup>;TRE-*Fgf9*-IRES-eGfp) mice as before and started Dox induction at  
587 E13.5 until E15.0 (Fig 3). At E15.0, all of the *Fgf20*-het (4/4) and *Fgf20*-null (4/4) cochleae  
588 contained *Myo6*-expressing HCs, while none of the *Fgf9*-OA (0/4) and *Fgf20*-rescue (0/4)  
589 cochleae contained *Myo6*-expressing HCs (Fig 10C). This suggests that ectopic expression of  
590 FGF9 was able to delay the onset of differentiation, even with the lack of endogenous FGF20.  
591 Despite this delay in onset of differentiation, by P0, differentiation has apparently caught up in  
592 both *Fgf9*-OA and *Fgf20*-rescue cochleae (Fig 3A).

593  
594 Similar to a delay in prosensory specification, premature onset of differentiation narrows the  
595 temporal buffer between the completion of specification and initiation of differentiation towards  
596 the cochlear base. In the context of a slight delay in specification due to decreased *Sox2* levels,  
597 premature differentiation from the loss of *Fgf20* can lead to an attempt at differentiation before  
598 specification in the basal end of the cochlea. We propose that *Sox2* and *Fgf20* interact to  
599 regulate the boundaries of the temporal buffer, helping to ensure that differentiation begins after  
600 the completion of specification (Fig 11).

601

602

## 603 Discussion

604

605 ***Fgfr1* is involved in prosensory specification and differentiation, while *Fgf20* is**  
606 **only involved in differentiation**

607



608 *Fgf20* and *Fgfr1* are required for HC and SC development. Based on similarities in the  
609 phenotype caused by the loss of FGF20 and loss of FGFR1 signaling, FGF20 has been  
610 hypothesized as the FGFR1 ligand during organ of Corti development [17–21]. However, the  
611 exact role of FGF20/FGFR1 during organ of Corti development has been a topic of debate. We  
612 previously reported that *Fgf20*-KO mice do not have defects in prosensory specification, and  
613 have a normally formed prosensory domain [21]. We further showed that FGF20 signaling is  
614 important during the initiation stage of differentiation, and that *Fgf20*-KO cochleae have gaps in  
615 the differentiated sensory epithelium filled with undifferentiated prosensory progenitors.  
616 However, other studies have shown *in vitro* that FGF20 regulates prosensory specification via  
617 *Sox2* [33] and *in vivo* that FGFR1 is required for prosensory specification via *Sox2* [19]. Here,  
618 using an *in vivo* rescue model, we show that ectopic FGF9 signaling is sufficient to rescue the  
619 *Fgf20*-KO phenotype in a spatiotemporal pattern that matched the timing of initiation of  
620 differentiation along the length of the cochlear duct. We conclude, therefore, that FGF20 is  
621 involved in differentiation and not necessary for prosensory specification.

622  
623 Notably, the *Fgf20*-KO phenotype, in which two-thirds of OHCs fail to develop, is not as severe  
624 as the *Fgfr1*-CKO phenotype, which lacks almost all OHCs as well as half of IHCs. Potential  
625 explanations for this include differences in mouse genetic background, and the existence of a  
626 redundant FGF ligand(s). To rule out the former, we examine here *Fgf20*-KO and *Fgfr1*-CKO  
627 mice on a similar genetic background, and replicated the difference in phenotype severity. We  
628 also replicated the decrease in *Sox2* expression in the prosensory domain previously reported  
629 in *Fgfr1*-CKO mice [19]. We further reaffirmed that *Sox2* expression in the prosensory domain is  
630 not affected by the loss of *Fgf20*. This suggests that another FGF ligand signaling through  
631 FGFR1 is required to maintain *Sox2* expression during prosensory specification. The identity of  
632 this ligand is currently unknown.

633

634 *Foxg1<sup>Cre</sup>* has been used in several studies to target the otic epithelium, including to conditionally  
635 delete *Fgfr1* [18–20]. One concern with *Foxg1<sup>Cre</sup>* is that it is a null allele [22]. *Foxg1*-null mice  
636 have shortened cochlear length, although HC and SC differentiation did not appear to be  
637 directly affected [34]. Previous work [35] and our results here showed that *Foxg1* is not  
638 haploinsufficient during cochlea development, as *Foxg1<sup>Cre/+</sup>;Fgfr1<sup>flox/+</sup>* cochleae had very similar  
639 phenotypes to *Fgfr1<sup>+/-</sup>* cochleae. Moreover, the use of the Six1enh21-Cre transgene, which  
640 targets the otic epithelium in a similar spatiotemporal pattern as *Foxg1<sup>Cre</sup>*, to conditionally delete  
641 *Fgfr1* resulted in the same phenotype as *Foxg1<sup>Cre/+</sup>;Fgfr1<sup>flox/-</sup>* cochleae [19]. This included the  
642 loss of almost all OHCs, loss of IHCs, and decreased prosensory *Sox2* expression. Therefore,  
643 the increased severity of *Foxg1<sup>Cre/+</sup>;Fgfr1<sup>flox/-</sup>* cochleae relative to *Fgf20<sup>-/-</sup>* cochleae is likely not  
644 attributable *Foxg1* haploinsufficiency.

645  
646 We hypothesized that the severity of the *Fgfr1*-CKO phenotype is due to the loss of FGF20  
647 signaling during differentiation and decreased *Sox2* expression causing disrupted prosensory  
648 specification. Consistent with this hypothesis, the combination of *Fgf20<sup>-/-</sup>* and *Sox2<sup>Ysb/Ysb</sup>*  
649 mutations phenocopied *Fgfr1*-CKO cochleae. The similarities in phenotype include  
650 approximately a 30% reduction in cochlear length and almost a complete loss of OHCs and SCs  
651 and approximately a 50% loss of IHCs. Interestingly, the *Fgf20<sup>-/-</sup>;Sox2<sup>Ysb/Ysb</sup>* phenotype is also  
652 similar to the *Sox2<sup>Ysb/-</sup>* phenotype. We conclude that the *Fgfr1*-CKO, *Fgf20<sup>-/-</sup>;Sox2<sup>Ysb/Ysb</sup>*, and  
653 *Sox2<sup>Ysb/-</sup>* phenotypes likely lie along the same continuum, as these three genotypes all exhibited  
654 a lack of *Fgf20* expression or signaling and varying levels of *Sox2* expression (Fig 9A). *Fgf20*-  
655 KO cochleae, in which *Sox2* expression was not affected, lies at the mild end of this continuum.  
656 Interestingly, this continuum shows that in the absence of *Fgf20* expression or signaling,  
657 reductions in the level of *Sox2* most severely affected sensory epithelium development of the  
658 cochlear base and the outer compartment. Moving from the *Fgf20*-KO (mild) end of the

659 spectrum towards the *Sox2*<sup>Ysb/-</sup> (severe) end, increasing numbers of HCs and SCs are lost,  
660 preferentially from the cochlear base and the outer compartment.

661

662 ***Sox2* and *Fgf20* interact to affect development towards the basal end of the**  
663 **cochlea**

664

665 We show here conclusive evidence that *Sox2* and *Fgf20* genetically interact during cochlea  
666 development. Interestingly, HC and SC development towards the basal end of the cochlea is  
667 more severely affected by the loss of *Sox2* and *Fgf20* and their interaction. While we  
668 hypothesize that *Sox2* and *Fgf20* are involved in distinct steps during organ of Corti  
669 development (prosensory specification and differentiation, respectively), there is nevertheless  
670 potential for a strong interaction. We propose that the timing of specification and differentiation  
671 define a temporal buffer that normally prevents differentiation from initiating prior to the  
672 completion of specification, and that *Sox2* and *Fgf20* modulate the borders of this buffer. In a  
673 developmental pathway, the upstream event (specification) must occur prior to the downstream  
674 event (differentiation). Therefore, loss of *Sox2* and *Fgf20* leading to delayed specification and  
675 premature differentiation onset, respectively, disrupts the temporal buffer, especially towards the  
676 cochlear base (Fig 11).

677

678 Specification must occur prior to the onset of differentiation. However, cell cycle exit does not  
679 need to occur prior to the onset of differentiation, as mice lacking *Cdkn1b*, which is required for  
680 cell cycle exit, still produce HCs and SCs (Chen & Segil, 1999; Kanzaki et al., 2006). Here, we  
681 use cell cycle exit in the prosensory domain (also known as the zone of non-proliferation) as a  
682 marker for the completion of specification (Chen & Segil, 1999). We hypothesize that  
683 prosensory cells become specified and primed for differentiation upon withdrawal from the cell

684 cycle. Previous studies showed that prosensory cells are indeed capable of differentiating into  
685 HCs and SCs directly after cell cycle exit, even in the apex. When *Shh* was deleted from the  
686 spiral ganglion, differentiation began in the apex shortly after cell cycle exit and progressed  
687 towards the base [5]. This suggests that specification occurs in an apex-to-base direction. We  
688 cannot rule out, however, that specification occurs in the same direction as differentiation (base-  
689 to-apex), independently of cell cycle exit. Such a scenario would still be consistent with our  
690 model that a combination of delayed specification and premature onset of differentiation  
691 accounts for the more severe basal phenotype in *Fgf20/Sox2* mutants.

692  
693 The effect of loss of *Fgf20* on the timing of differentiation is small. We estimate that the onset of  
694 differentiation in *Fgf20*-KO cochleae is advanced by only around 0.5 days. By itself, this effect  
695 does not lead to a more severe mid-basal or basal phenotype in *Fgf20*-KO cochleae. However,  
696 we present evidence that on a sensitized genetic background of delayed specification, this small  
697 change in the timing of differentiation leads to a large defect in HC and SC production towards  
698 the basal end of the cochleae. We propose that this at least partially explains the interaction  
699 between *Sox2* and *Fgf20*. Furthermore, the relative sparing of development towards the apical  
700 end of *Sox2<sup>Ysb/Ysb</sup>;Fgf20<sup>-/-</sup>* cochleae, especially of IHCs, can be further explained by a delay in  
701 differentiation at the apical end due to the loss of *Fgf20*. We do not know why an apical-basal  
702 difference in timing of differentiation exists in *Fgf20*-KO cochleae. Perhaps there is a delay in  
703 the apical progression of differentiation, or perhaps other factors contribute to the differentiation  
704 of the apical end of the cochlea. Consistent with the latter, by P7 in *Fgf20*-KO cochleae, the  
705 apical tip contains a full complement of IHCs and OHCs [21].

706  
707 Notably, while we show the potential for a *Sox2* and *Fgf20* interaction in modulating the  
708 temporal buffer between specification and differentiation, *Sox2* also has known roles during HC  
709 and SC differentiation [13,15,37,38]. Therefore, the genetic interaction may occur during

710 differentiation as well. While interaction at this stage may explain the preferential loss of outer  
711 compartment cells in *Sox2* and *Fgf20* mutants, it does not explain the selective loss of basal  
712 cochlear HCs and SCs. Therefore, we conclude that the *Sox2* and *Fgf20* interaction regulates  
713 the temporal buffer, with potential further interactions during differentiation.

714

715 The Notch ligand Jagged1 (*Jag1*) is thought to be important for cochlear prosensory  
716 specification via lateral induction [39–45]. Interestingly, Notch signaling has also been shown to  
717 be upstream of both *Fgf20* and *Sox2* in the developing cochlea [33]. Conditional deletion of  
718 *Jag1* or *Rbpj*, the major transcriptional effector of canonical Notch signaling, resulted in the loss  
719 of HCs and SCs, particularly from the basal end of the cochlear duct, similarly to *Fgf20/Sox2*  
720 mutants. Unlike *Fgf20/Sox2* mutants, however, deletion of *Jag1* or *Rbpj* led to preferential loss  
721 of *Sox2* and CDKN1B expression from the prosensory domain at the basal end of the cochlea  
722 [40,42,46]. This suggests that *Jag1*-Notch signaling is required for prosensory specification,  
723 especially towards the cochlear base. This likely accounts for the more severe basal phenotype  
724 of *Jag1* or *Rbpj* mutants. This same mechanism likely does not explain the more severe basal  
725 phenotype of *Fgf20/Sox2* mutants, as *Sox2* and CDKN1B expression was not more severely  
726 reduced or absent in the cochlear base in these mice. Notably, not all studies agree that *Jag1* or  
727 *Rbpj* is required for *Sox2* and CDKN1B expression or for prosensory specification [47]. Further  
728 studies are required to elucidate the functional relationship between *Jag1/Notch*, *Fgf20*, and  
729 *Sox2* during cochlea development.

730

731 Other genes that potentially interact with *Fgf20* and *Sox2* during cochlea development include  
732 *Mycn* (*N-Myc*) and *Mycl* (*L-Myc*). Interestingly, deletion of *Mycn* and *Mycl* from the cochlear  
733 epithelium results in accelerated cell cycle exit and delayed initiation of differentiation [48],  
734 opposite to the effects of loss of *Sox2* and *Fgf20*. Addressing potential interactions between  
735 *Sox2*, *Fgf20*, *Mycn*, and *Mycl* is another topic for future studies.

736

737 **Outer compartment of the cochlear sensory epithelium is more sensitive to the**  
738 **loss of *Fgfr1*, *Fgf20*, and *Sox2* than the inner compartment.**

739

740 In all of the genotypes we observed in this study, the loss of outer compartment cells (i.e.  
741 OHCs) was predominant. Only in the most severe cases in which almost all OHCs were  
742 missing, as seen in *Fgfr1*-CKO, *Fgf20*<sup>-/-</sup>; *Sox2*<sup>Ysb/Ysb</sup>, and *Sox2*<sup>Ysb/-</sup> cochleae, were IHCs also lost.  
743 Similarly, reduction in SC number always preferentially affected the outermost cells. This  
744 suggests that the organ of Corti outer compartment is more sensitive to the loss of *Fgfr1*, *Fgf20*,  
745 and *Sox2* than the inner compartment. The combination of *Fgf20*<sup>-</sup> and *Sox2*<sup>Ysb</sup> alleles elegantly  
746 demonstrates this: as the number of *Fgf20*<sup>-</sup> and *Sox2*<sup>Ysb</sup> alleles increased, the number of OHCs  
747 progressively decreased. In the double homozygous mutants, the number of IHCs decreased as  
748 well.

749

750 Previous studies noted that the dosage of *Fgfr1* affects the degree of organ of Corti outer  
751 compartment loss. In *Fgfr1* hypomorphs with 80% reduction in transcription, only the third row of  
752 OHCs were missing, while 90% hypomorphs had a slightly more severe phenotype [20].  
753 Therefore, *Fgfr1* loss preferentially affects the outermost HCs. Other studies suggested that the  
754 timing of *Fgfr1* deletion is important in determining the degree of outer compartment loss and  
755 level of *Sox2* expression. When an earlier-expressed Cre driver (*Six1enh21*-Cre) was used to  
756 conditionally delete *Fgfr1*, almost all OHCs and some IHCs were lost, with a 66% reduction in  
757 *Sox2* expression at E14.5 [19]. When a later-expressed Cre driver (*Emx2*<sup>Cre</sup>) was used, many  
758 more OHCs and IHCs remained, with only a 12% reduction in *Sox2* expression. Our results are  
759 consistent with both of these studies. We show that FGF20-independent FGFR1 signaling and

760 Sox2 are required early, affecting both IHC and OHC development, while FGF20-FGFR1  
761 signaling is important during later stages, affecting only OHC development.  
762  
763 Differentiation in the organ of Corti not only occurs in a basal-to-apical gradient, but also occurs  
764 in an orthogonal inner-to-outer gradient. That is, IHCs differentiate first, followed by each  
765 sequential row of OHCs [49]. This wave of differentiation suggests that perhaps outer  
766 compartment HCs and SCs require a longer temporal buffer between specification and  
767 differentiation. The genetic interaction between *Sox2* and *Fgf20* in modulating this temporal  
768 buffer, therefore, could also account for the loss of outer compartment HCs and SCs. We  
769 hypothesize that the requirement for a longer temporal buffer may also be involved in  
770 determining OHC fate. In *Fgf20<sup>+/-</sup>;Sox2<sup>+/-</sup>* cochleae, there was a slight decrease in OHCs that  
771 was compensated for by ectopic IHCs, suggesting a fate switch from OHCs into IHCs. Here, we  
772 confirmed previous suggestions that *Fgf20* regulates *Hey1* and *Hey2* to prevent premature  
773 differentiation in the developing organ of Corti [8,29]. Interestingly, in *Hey1/Hey2* double  
774 knockout cochleae, there was a similar slight decrease in OHCs compensated for by ectopic  
775 IHCs [29]. Furthermore, inner ear-specific deletion of either *Smoothed* or *Neurod1*, which led  
776 to premature differentiation in the apical cochlear turn, also led to loss of OHCs and the  
777 presence of ectopic IHCs at the apex [6,8]. These findings further support a model where timing  
778 of specification and differentiation affect IHC versus OHC fate, an interesting and important  
779 topic for future studies.  
780  
781 Previously, we hypothesized that *Fgf20* is strictly required for the differentiation of an outer  
782 compartment progenitor [21]. However, data we present here show that *Fgf20*, on a sensitized,  
783 *Sox2* hypomorphic background, is also required for inner compartment differentiation. We  
784 conclude that inner and outer compartment progenitors likely are not distinct populations.  
785 Rather, all prosensory progenitors giving rise to the organ of Corti exist on an inner-to-outer

786 continuum. FGF20 signaling, in combination with other factors including Sox2, are required for  
787 the proper development of all of these cells, though with varying sensitivities.

788

789 **The relationship between *Fgf20* and *Hey1/Hey2* in regulating differentiation is**  
790 **complex**

791

792 We show *in vivo* that *Fgf20* is upstream of *Hey1* and *Hey2*. Supporting this result, *Fgfr1* has  
793 also been shown *in vivo* to be upstream of *Hey2* [19]. Interestingly, in explant studies, inhibition  
794 of FGF signaling alone did not result in decreased *Hey1/Hey2* expression or premature  
795 differentiation [29]. However, FGF inhibition was able to rescue the overexpression of  
796 *Hey1/Hey2* and the delay in differentiation induced by SHH signaling overactivation [8,29].  
797 These discrepancies suggest that the relationship between *Fgf20* and *Hey1/Hey2* is more  
798 complicated than we currently understand. Notably, *Hey1/Hey2* double knockout cochleae do  
799 not exhibit a loss of OHCs to the extent of *Fgf20*-KO cochleae, suggesting that other genes  
800 downstream of *Fgf20* are important in organ of Corti development. Moreover, deletion of *Fgf20*  
801 only led to premature differentiation at the basal and mid-basal turns. *Fgf20* deletion actually  
802 delayed differentiation in the apical end of the cochlea. Deletion of *Hey1/Hey2*, contrarily, led to  
803 premature differentiation along the entire length of the cochlear duct, although it is unclear how  
804 *Hey1/Hey2* loss affects the timing of apical differentiation beyond E15.0 [29]. This suggests that  
805 other factors downstream of *Fgf20* interact with *Hey1/Hey2* to regulate the timing of  
806 differentiation. Perhaps these same genes contribute to the loss of OHCs in *Fgf20*-KO  
807 cochleae. *Mekk4*, which has been shown to be downstream of *Fgf20* and necessary for OHC  
808 differentiation [50] could be one of these genes. Identifying other factors downstream of *Fgf20*  
809 will be a topic of future studies.

810



811

812 **Materials and methods**

813

814 **Key Resources Table**

| Reagent type<br>(species) or<br>resource  | Designation                 | Source or<br>reference           | Identifiers              | Additional<br>informatio<br>n |
|-------------------------------------------|-----------------------------|----------------------------------|--------------------------|-------------------------------|
| Genetic reagent<br>( <i>M. musculus</i> ) | <i>Fgf20<sup>Cre</sup></i>  | Huh et al., 2015                 | MGI:5751785              |                               |
| Genetic reagent<br>( <i>M. musculus</i> ) | <i>Fgf20<sup>βgal</sup></i> | Huh et al., 2012                 | RRID:MGI:5425887         |                               |
| Genetic reagent<br>( <i>M. musculus</i> ) | <i>Foxg1<sup>Cre</sup></i>  | Hébert and<br>McConnell,<br>2000 | RRID:IMSR_JAX:00<br>4337 |                               |
| Genetic reagent<br>( <i>M. musculus</i> ) | <i>Fgfr1<sup>flox</sup></i> | Trokovic et al.,<br>2003         | RRID:IMSR_CMMR:<br>0268  |                               |
| Genetic reagent<br>( <i>M. musculus</i> ) | <i>Sox2<sup>Cre</sup></i>   | Hayashi et al.,<br>2002          | RRID:IMSR_JAX:00<br>4783 |                               |
| Genetic reagent<br>( <i>M. musculus</i> ) | <i>Sox2<sup>Ysb</sup></i>   | Dong et al.,<br>2002             | RRID:IMSR_EM:050<br>15   |                               |
| Genetic reagent<br>( <i>M. musculus</i> ) | <i>Sox2<sup>flox</sup></i>  | Shaham et al.,<br>2009           | RRID:IMSR_JAX:01<br>3093 |                               |
| Genetic reagent<br>( <i>M. musculus</i> ) | <i>ROSA<sup>rtTA</sup></i>  | Belteki et al.,<br>2005          | RRID:IMSR_JAX:00<br>5670 |                               |

|                                           |                                             |                             |             |                          |
|-------------------------------------------|---------------------------------------------|-----------------------------|-------------|--------------------------|
| Genetic reagent<br>( <i>M. musculus</i> ) | TRE-Fgf9-IRES-eGfp                          | White et al.,<br>2006       | MGI:5538516 |                          |
| Recombinant<br>DNA reagent                | <i>pBluescriptKS-Fgfr1TM</i>                | K. Peters                   |             |                          |
| Recombinant<br>DNA reagent                | <i>pGEMT-Fgf20</i>                          |                             |             |                          |
| Recombinant<br>DNA reagent                | <i>pBluescriptSK-Sox2</i>                   | R. Lovell-Badge             |             | Gift of A.<br>Kiernan    |
| Recombinant<br>DNA reagent                | <i>pGEM-Etv4</i>                            | G. Martin                   |             |                          |
| Recombinant<br>DNA reagent                | <i>pBluescriptSK-Etv5</i>                   | G. Martin                   |             |                          |
| Recombinant<br>DNA reagent                | <i>pT7T3D-Hey1</i>                          | IMAGE clone                 | #478014     | Gift of S.<br>Rentschler |
| Recombinant<br>DNA reagent                | <i>pCMVSPORT6-Hey2</i>                      | IMAGE clone                 | #5374813    | Gift of S.<br>Rentschler |
| Antibody                                  | Sheep polyclonal<br>anti-Digoxigenin-<br>AP | Sigma-Aldrich               | 11093274910 | 1:1000                   |
| Antibody                                  | Rabbit polyclonal<br>anti-P75NTR            | EMD Millipore               | AB1554      | 1:300                    |
| Antibody                                  | Rabbit polyclonal<br>anti-Prox1             | EMD Millipore               | ABN278      | 1:1000                   |
| Antibody                                  | Goat polyclonal<br>anti-Sox2                | Santa Cruz<br>Biotechnology | sc-17320    | 1:200                    |

|                         |                                                    |                          |           |       |
|-------------------------|----------------------------------------------------|--------------------------|-----------|-------|
| Antibody                | Rabbit polyclonal anti-p27Kip1                     | Neomarkers               | RB-9019-P | 1:50  |
| Antibody                | Rabbit polyclonal anti-Ki67                        | Abcam                    | ab15580   | 1:200 |
| Antibody                | Rabbit polyclonal anti-Myo6                        | Santa Cruz Biotechnology | sc-50461  | 1:100 |
| Antibody                | Donkey polyclonal anti-Rabbit IgG, Alexa Fluor 488 | Thermo-Fisher Scientific | A-21206   | 1:500 |
| Antibody                | Donkey polyclonal anti-Goat IgG, Alexa Fluor 555   | Thermo-Fisher Scientific | A-21432   | 1:500 |
| Antibody                | Goat polyclonal anti-Rabbit IgG, Flexa Fluor 555   | Thermo-Fisher Scientific | A-21428   | 1:500 |
| Chemical compound, drug | Alexa Fluor 488-conjugated Phalloidin              | Invitrogen               | A12379    | 1:50  |
| Chemical compound, drug | Dox Diet, Grain-Based Doxycycline                  | Bio-Serv                 | S3888     |       |
| Chemical compound, drug | EdU (5-ethynyl-2'-deoxyuridine)                    | Thermo-Fisher Scientific | E10187    |       |
| Commercial assay or kit | Click-iT EdU Alexa Fluor 488 kit                   | Thermo-Fisher Scientific | C10337    |       |

## 816 Mice

817

818 Mice were group housed with littermates, in breeding pairs, or in a breeding harem (2 females to  
819 1 male), with food and water provided ad libitum.

820

821 For timed-pregnancy experiments, embryonic day 0.5 (E0.5) was assigned as noon of the day  
822 the vaginal plug was found. For postnatal experiments, postnatal day 0 (P0) was determined as  
823 the day of birth.

824

825 Mice were of mixed sexes and maintained on a mixed C57BL/6J x 129X1/SvJ genetic  
826 background. All mice were backcrossed at least three generations onto this background. The  
827 following mouse lines were used:

- 828 • *Fgf20<sup>Cre</sup>* (*Fgf20<sup>-</sup>*): knockin allele containing a sequence encoding a GFP-Cre fusion  
829 protein replacing exon 1 of *Fgf20*, resulting in a null mutation [18].
- 830 • *Fgf20<sup>βgal</sup>*: knockin allele containing a sequence encoding β-galactosidase (βgal)  
831 replacing exon 1 of *Fgf20*, resulting in a null mutation [21].
- 832 • *Foxg1<sup>Cre</sup>*: knockin allele containing a sequence encoding Cre fused in-frame downstream  
833 of the first 13 codons, resulting in a null mutation [22].
- 834 • *Fgfr1<sup>flox</sup>*: allele containing loxP sequences flanking exons 8 through 15 of *Fgfr1*. Upon  
835 Cre-mediated recombination, produces a null mutation [51]
- 836 • *Fgfr1<sup>-</sup>*: null allele generated by combining *Fgfr1<sup>flox</sup>* with *Sox2<sup>Cre</sup>* [52] to delete *Fgfr1* from  
837 the epiblast.
- 838 • *ROSA<sup>rtTA</sup>*: knockin allele containing a loxP-Stop-loxP sequence followed by a sequence  
839 encoding rtTA-IRES-eGFP, targeted to the ubiquitously expressed *ROSA26* locus. Upon

- 840 Cre-mediated recombination, reverse tetracycline transactivator (rtTA) and eGFP are  
841 expressed [25].
- 842 • TRE-Fgf9-IRES-eGfp: transgene containing seven tetracycline-inducible regulatory elements  
843 driving the expression of FGF9-IRES-eGFP [26].
  - 844 • *Sox2<sup>Ysb</sup>*: Inner ear specific *Sox2* hypomorphic allele resulting from a random insertion of  
845 a transgene in chromosome 3, likely interfering with tissue-specific *Sox2* regulatory  
846 elements [11].
  - 847 • *Sox2*: null allele generated by combining *Sox2<sup>flox</sup>* [53] with *Sox2<sup>Cre</sup>* to delete *Sox2* from  
848 the epiblast.

849

850 All studies performed were in accordance with the Institutional Animal Care and Use Committee  
851 at Washington University in St. Louis (protocol #20160113) and University of Nebraska Medical  
852 Center (protocol #16-004-02 and 16-005-02).

853

### 854 **Doxycycline induction**

855

856 Pregnant dams were starved overnight the night before initiation of Dox induction and fed Dox  
857 Diet, Grain-Based Doxycycline, 200 mg/kg (S3888, Bio-Serv, Flemington, NJ) ad libitum starting  
858 at noon on the start date of Dox induction. On the stop date of Dox induction, Dox Diet was  
859 replaced with regular mouse chow at noon.

860

### 861 **Sample preparation and sectioning**

862

863 For whole mount cochleae, inner ears were dissected out of P0 pups and fixed in 4% PFA in  
864 PBS overnight at 4°C with gentle agitation. Samples were then washed x3 in PBS. Cochleae

865 were dissected away from the vestibule, otic capsule, and periotic mesenchyme with Dumont  
866 #55 Forceps (RS-5010, Roboz, Gaithersburg, MD). The roof of the cochlear duct was opened  
867 up by dissecting away the stria vascularis and Reissner's membrane; tectorial membrane was  
868 removed to expose hair and supporting cells.

869

870 For sectioning, heads from E14.5 embryos were fixed in 4% PFA in PBS overnight at 4°C with  
871 gentle agitation. Samples were then washed x3 in PBS and cryoprotected in 15% sucrose in  
872 PBS overnight and then in 30% sucrose in PBS overnight. Samples were embedded in Tissue-  
873 Tek O.C.T. compound (4583, VWR International, Radnor, PA) and frozen on dry ice. Serial  
874 horizontal sections through base of the head were cut at 12 µm with a cryostat, dried at room  
875 temperature, and stored at -80°C until use.

876

### 877 **RNA in situ hybridization**

878

879 Probe preparation: mouse cDNA plasmids containing the following inserts were used to make  
880 RNA in situ probes, and were cut and transcribed with the indicated restriction enzyme (New  
881 England Biolabs, Ipswich, MA) and RNA polymerase (New England Biolabs, Ipswich, MA):  
882 *Fgfr1* transmembrane domain (325 bp, HincII, T7, gift of K. Peters), *Fgf20* (653 bp, NcoI, Sp6),  
883 *Sox2* (750 bp, Accl, T3, gift of A. Kiernan), *Etv4* (~2300 bp, Apal, Sp6, gift of G. Martin), *Etv5*  
884 (~4000 bp, HindIII, T3, gift of G. Martin), *Hey1* (343 bp, EcoRI, T3, gift of S. Rentschler), *Hey2*  
885 (819 bp, EcoRI, T7, gift of S. Rentschler). Restriction digest and *in vitro* transcription were done  
886 according to manufacturer's instructions, with DIG RNA Labeling Mix (11277073910, Sigma-  
887 Aldrich, St. Louis, MO). After treatment with RNase-free DNase I (04716728001, Sigma-Aldrich,  
888 St. Louis, MO) for 15 min at 37°C, probes were hydrolyzed in hydrolysis buffer (40 mM  
889 NaHCO<sub>3</sub>, 60 mM Na<sub>2</sub>CO<sub>3</sub>) at 60°C for up to 30 min, depending on probe size.

890

891 Frozen section in situ hybridization: frozen slides were warmed for 20 min at room temperature  
892 and then 5 min at 50°C on a slide warmer. Sections were fixed in 4% PFA in PBS for 20 min at  
893 room temperature, washed x2 in PBS and treated with pre-warmed 10 µg/ml Proteinase K  
894 (03115828001, Sigma-Aldrich, St. Louis, MO) in PBS for 7 min at 37°C. Sections were then  
895 fixed in 4% PFA in PBS for 15 min at room temperature, washed x2 in PBS, acetylated in 0.25%  
896 acetic anhydrate in 0.1M Triethanolamine, pH 8.0, for 10 min, and washed again in PBS.  
897 Sections were then placed in pre-warmed hybridization buffer (50% formamide, 5x SSC buffer,  
898 5 mM EDTA, 50 µg/ml yeast tRNA) for 3 h at 60°C in humidified chamber for prehybridization.  
899 Sections were then hybridized in 10 µg/ml probe/hybridization buffer overnight (12-16 h) at  
900 60°C. The next day, sections were washed in 1x SSC for 10 min at 60°C, followed by 1.5x SSC  
901 for 10 min at 60°C, 2x SSC for 20 min at 37°C x2, and 0.2x SSC for 30 min at 60°C x2. Sections  
902 were then washed in KTBT (0.1 M Tris, pH 7.5, 0.15 M NaCl, 5 mM KCl, 0.1% Triton X-100) at  
903 room temperature and blocked in KTBT + 20% sheep serum + 2% Blocking Reagent  
904 (11096176001, Sigma-Aldrich, St. Louis, MO) for 4 h. Blocking Reagent was dissolved in 100  
905 mM Maleic acid, 150 mM NaCl, pH 7.5. Sections were then incubated in sheep anti-  
906 Digoxigenin-AP, Fab fragments (1:1000, 11093274910, Sigma-Aldrich, St. Louis, MO) in KTBT  
907 + 20% sheep serum + 2% Blocking Reagent overnight at 4°C. Sections were then washed x3 in  
908 KTBT for 30 min at room temperature, and then washed x2 in NTMT (0.1 M Tris, pH 9.5, 0.1 M  
909 NaCl, 50 mM MgCl<sub>2</sub>, 0.1% Tween 20) for 15 min. Sections were next incubated in NTMT +  
910 1:200 NBT/BCIP Stock Solution (11681451001, Sigma-Aldrich, St. Louis, MO) in the dark at  
911 room temperature until color appeared. Sections were then washed in PBS, post-fixed in 4%  
912 PFA in PBS for 15 min and washed x2 in PBS. Finally, sections were dehydrated in 30% and  
913 then 70% methanol, 5 min each, followed by 100% methanol for 15 min. Sections were then  
914 rehydrated in 70% and 30% methanol and then PBS, 5 min each, and mounted in 95% glycerol.  
915

916 **Immunofluorescence**

917

918 Whole mount: cochleae were incubated in PBS + 0.5% Tween-20 (PBSTw) for 1 h to  
919 permeabilize. Cochleae were then blocked using PBSTw + 5% donkey serum for 1 h and then  
920 incubated in PBSTw + 1% donkey serum with the primary antibody overnight at 4°C. Cochleae  
921 were then washed x3 in PBS and incubated in PBS + 1% Tween-20 with the secondary  
922 antibody. After wash in PBS x3, cochleae were mounted in 95% glycerol with the sensory  
923 epithelium facing up.

924

925 Frozen slides were warmed for 30 min at room temperature and washed in PBS before  
926 incubating in PBS + 0.5% Triton X-100 (PBST) for 1 h to permeabilize the tissue. Sections were  
927 then blocked using in PBST + 5% donkey serum for 1 h and then incubated in PBST + 1%  
928 donkey serum with the primary antibody overnight at 4°C in a humidified chamber. Sections  
929 were then washed x3 in PBS and incubated in PBS + 1% Triton X-100 with the secondary  
930 antibody. After wash in PBS x3, slides were mounted in VectaShield antifade mounting medium  
931 with DAPI (H-1200, Vector Labs, Burlingame, CA).

932

933 **Cell proliferation assay**

934

935 EdU (E10187, Thermo-Fisher Scientific, Waltham, MA) was injected i.p. into pregnant dams at  
936 100 µg per gram body weight. Embryos were harvested at 1 h after injection. EdU was detected  
937 using the Click-iT EdU Alexa Fluor 488 kit (C10337, Thermo-Fisher Scientific, Waltham, MA)  
938 according to manufacturer's instructions.

939



940 **Imaging**

941

942 Brightfield microscopy was done using a Hamamatsu NanoZoomer slide scanning system with  
943 a 20x objective. Images were processed with the NanoZoomer Digital Pathology (NDP.view2)  
944 software.

945

946 Fluorescent microscopy was done using a Zeiss LSM 700 confocal or Zeiss Axio Imager Z1 with  
947 Apotome 2, with z-stack step-size determined based on objective lens type (10x or 20x), as  
948 recommended by the ZEN software (around 1  $\mu\text{m}$ ). Fluorescent images shown are maximum  
949 projections. Low magnification fluorescent images shown of the whole cochlear duct required  
950 stitching together, by hand, several images. Images were processed with ImageJ  
951 ([imagej.nih.gov](http://imagej.nih.gov)).

952

953 **Quantification**

954

955 Measurements and cell quantification (using the Cell Counter plugin by Kurt De Vos) were done  
956 using ImageJ. Total cochlear duct length was defined as the length from the very base of the  
957 cochlea to the very tip of the apex, along the tunnel of Corti. Hair cells were identified via  
958 Phalloidin, which binds to F-actin [54]. Inner pillar cells were labeled via p75NTR [55], and  
959 supporting cells (SCs, including pillar cells and Deiters' cells) were labeled with a combination of  
960 Prox1 [56] and Sox2 [10]. Inner hair cells (IHCs) were differentiated from outer hair cells (OHCs)  
961 based on their neural/abneural location, respectively, relative to p75NTR-expressing inner pillar  
962 cells. For total cell counts, IHCs, OHCs, and SCs were counted along the entire length of the  
963 cochlea. Total cell counts were also normalized to cochlear length and presented as cell count  
964 per 100  $\mu\text{m}$  of cochlea (e.g. IHCs/100  $\mu\text{m}$ ). For cell quantification at the basal, middle, and

965 apical turns of the cochlea, the cochlear duct was evenly divided into thirds, and total IHCs,  
966 OHCs, and SCs were quantified for each third and normalized to length. For the Fgf20-rescue  
967 experiments in Fig 3, IHCs, OHCs, and SCs from at least 300  $\mu\text{m}$  regions of the basal (10%),  
968 middle (40%), and apical (70%) turns of the cochleae were counted and normalized to 100  $\mu\text{m}$   
969 along the length of the cochlear duct.

970

971 In  $\text{Sox2}^{\text{Ysb}/-}$  cochleae, p75NTR expression was mostly absent, resulting in sensory islands  
972 without p75NTR-expressing inner pillar cells. In these cochleae, HCs not associated with inner  
973 pillar cells were presumed to be IHCs during quantification. When a curved line was drawn  
974 connecting the p75NTR islands along the organ of Corti, these presumed IHCs were always  
975 medial (neural) to that line.

976

## 977 **Statistical analysis and plotting**

978

979 All figures were made in Canvas X (ACD systems). Data analysis was performed using the  
980 Python programming language (python.org) in Jupyter Notebook (jupyter.org) with the following  
981 libraries: Pandas (pandas.pydata.org), NumPy (numpy.org) and SciPy (scipy.org). Plotting was  
982 done using the Matplotlib library (matplotlib.org). Statistics (t-test, one-way ANOVA, two-way  
983 ANOVA, and Fisher's exact test) were performed using the SciPy module Stats; Tukey's HSD  
984 was performed using the Statsmodels package (statsmodels.org). All comparisons of two  
985 means were performed using two-tailed, unpaired Student's t-test. For comparisons of more  
986 than two means, one-way ANOVA was used, except in Fig 8 and S7 Fig, where two-way  
987 ANOVA was used, with the factors being *Fgf20* (levels:  $Fgf20^{+/+}$ ,  $Fgf20^{+/-}$ ,  $Fgf20^{-/-}$ ) and *Sox2*  
988 (levels:  $Sox2^{+/+}$ ,  $Sox2^{\text{Ysb}/+}$ ,  $Sox2^{\text{Ysb}/\text{Ysb}}$ ) gene dosage. For significant ANOVA results at  $\alpha = 0.05$ ,  
989 Tukey's HSD was performed for post-hoc pair-wise analysis. In all cases,  $p < 0.05$  was  
990 considered statistically significant. All statistical details can be found in the figures and figure

991 legends. In all cases, each sample (each data point in graphs) represents one animal. Based on  
992 similar previous studies, a sample size of 3-5 was determined to be appropriate. Error bars  
993 represent mean  $\pm$  standard deviation (SD). For qualitative comparisons (comparing expression  
994 via immunofluorescence or RNA in situ hybridization), at least three samples were examined  
995 per genotype. All images shown are representative.

996  
997 Evaluation of onset of Myo6-expressing cells (Figs 10B and 10C): 3 or 4 serial sections through  
998 the entire cochleae were immunostained for Myo6 and evaluated, blinded to genotype, for the  
999 presence of Myo6-expressing cells. E14.5 embryos were further stage-matched based on  
1000 interdigital webbing of the hindlimb (at E14.5, roughly half of the hindlimb interdigital webbing is  
1001 still present). Of the 34 embryos at E14.5, 3 were removed from analysis due to lack of or  
1002 minimal hindlimb interdigital webbing (too old relative to the other embryos).

1003

## 1004 **Acknowledgements**

1005 We would like to thank Drew Hagan, Kel Vin Woo, and Yongjun Yin for their critical reading of  
1006 the manuscript.

1007

## 1008 **References**

1009

- 1010 1. Basch ML, Brown RM, Jen H-I, Groves AK. Where hearing starts: the development of the  
1011 mammalian cochlea. *J Anat.* 2016 Feb;228(2):233–54.
- 1012 2. Fekete DM, Muthukumar S, Karagogeos D. Hair Cells and Supporting Cells Share a  
1013 Common Progenitor in the Avian Inner Ear. *J Neurosci.* 1998 Oct 1;18(19):7811–21.
- 1014 3. Chen P, Segil N. p27(Kip1) links cell proliferation to morphogenesis in the developing  
1015 organ of Corti. *Development.* 1999 Apr;126(8):1581–90.
- 1016 4. Lee Y-S, Liu F, Segil N. A morphogenetic wave of p27Kip1 transcription directs cell cycle  
1017 exit during organ of Corti development. *Development.* 2006 Aug 1;133(15):2817–26.

- 1018 5. Bok J, Zenczak C, Hwang CH, Wu DK. Auditory ganglion source of Sonic hedgehog  
1019 regulates timing of cell cycle exit and differentiation of mammalian cochlear hair cells. *Proc*  
1020 *Natl Acad Sci U S A*. 2013 Aug 20;110(34):13869–74.
- 1021 6. Jahan I, Pan N, Kersigo J, Fritsch B. Neurod1 Suppresses Hair Cell Differentiation in Ear  
1022 Ganglia and Regulates Hair Cell Subtype Development in the Cochlea. Riley B, editor.  
1023 *PLOS ONE*. 2010 Jul 22;5(7):e11661.
- 1024 7. Matei V, Pauley S, Kaing S, Rowitch D, Beisel K w., Morris K, et al. Smaller inner ear  
1025 sensory epithelia in Neurog1 null mice are related to earlier hair cell cycle exit. *Dev Dyn*.  
1026 2005 Nov 1;234(3):633–50.
- 1027 8. Tateya T, Imayoshi I, Tateya I, Hamaguchi K, Torii H, Ito J, et al. Hedgehog signaling  
1028 regulates prosensory cell properties during the basal-to-apical wave of hair cell  
1029 differentiation in the mammalian cochlea. *Development*. 2013 Sep 15;140(18):3848–57.
- 1030 9. Gu R, Brown RM, Hsu C-W, Cai T, Crowder AL, Piazza VG, et al. Lineage tracing of Sox2-  
1031 expressing progenitor cells in the mouse inner ear reveals a broad contribution to non-  
1032 sensory tissues and insights into the origin of the organ of Corti. *Dev Biol*. 2016  
1033 01;414(1):72–84.
- 1034 10. Mak ACY, Szeto IYY, Fritsch B, Cheah KSE. Differential and overlapping expression  
1035 pattern of SOX2 and SOX9 in inner ear development. *Gene Expr Patterns*. 2009 Sep  
1036 1;9(6):444–53.
- 1037 11. Dong S, Leung KKH, Pelling AL, Lee PYT, Tang ASP, Heng HHQ, et al. Circling,  
1038 Deafness, and Yellow Coat Displayed by Yellow Submarine (Ysb) and Light Coat and  
1039 Circling (Lcc) Mice with Mutations on Chromosome 3. *Genomics*. 2002 Jun;79(6):777–84.
- 1040 12. Kiernan AE, Pelling AL, Leung KKH, Tang ASP, Bell DM, Tease C, et al. Sox2 is required  
1041 for sensory organ development in the mammalian inner ear. *Nature*. 2005 Apr  
1042 21;434(7036):1031–5.
- 1043 13. Dabdoub A, Puligilla C, Jones JM, Fritsch B, Cheah KSE, Pevny LH, et al. Sox2 signaling  
1044 in prosensory domain specification and subsequent hair cell differentiation in the  
1045 developing cochlea. *Proc Natl Acad Sci U S A*. 2008 Nov 25;105(47):18396–401.
- 1046 14. Pan W, Jin Y, Chen J, Rottier RJ, Steel KP, Kiernan AE. Ectopic Expression of Activated  
1047 Notch or SOX2 Reveals Similar and Unique Roles in the Development of the Sensory Cell  
1048 Progenitors in the Mammalian Inner Ear. *J Neurosci*. 2013 Oct 9;33(41):16146–57.
- 1049 15. Puligilla C, Kelley MW. Dual role for Sox2 in specification of sensory competence and  
1050 regulation of Atoh1 function. *Dev Neurobiol*. 2016;77(1):3–13.
- 1051 16. Ebeid M, Huh S-H. FGF signaling: diverse roles during cochlear development. *BMB Rep*.  
1052 2017 Oct 31;50(10):487–95.
- 1053 17. Hayashi T, Ray CA, Bermingham-McDonogh O. Fgf20 Is Required for Sensory Epithelial  
1054 Specification in the Developing Cochlea. *J Neurosci*. 2008 Jun 4;28(23):5991–9.

- 1055 18. Huh S-H, Warchol ME, Ornitz DM. Cochlear progenitor number is controlled through  
1056 mesenchymal FGF receptor signaling. *eLife*. 2015 Apr 27;4:e05921.
- 1057 19. Ono K, Kita T, Sato S, O'Neill P, Mak S-S, Paschaki M, et al. FGFR1-Frs2/3 Signalling  
1058 Maintains Sensory Progenitors during Inner Ear Hair Cell Formation. Cheah KSE, editor.  
1059 *PLOS Genet*. 2014 Jan 23;10(1):e1004118.
- 1060 20. Pirvola U, Ylikoski J, Trokovic R, Hébert JM, McConnell SK, Partanen J. FGFR1 is  
1061 required for the development of the auditory sensory epithelium. *Neuron*. 2002 Aug  
1062 15;35(4):671–80.
- 1063 21. Huh S-H, Jones J, Warchol ME, Ornitz DM. Differentiation of the Lateral Compartment of  
1064 the Cochlea Requires a Temporally Restricted FGF20 Signal. Groves A, editor. *PLOS Biol*.  
1065 2012 Jan 3;10(1):e1001231.
- 1066 22. Hébert JM, McConnell SK. Targeting of cre to the Foxg1 (BF-1) Locus Mediates loxP  
1067 Recombination in the Telencephalon and Other Developing Head Structures. *Dev Biol*.  
1068 2000 Jun 15;222(2):296–306.
- 1069 23. Ornitz DM, Itoh N. The Fibroblast Growth Factor signaling pathway. *Wiley Interdiscip Rev*  
1070 *Dev Biol*. 2015 May 1;4(3):215–66.
- 1071 24. Zhang X, Ibrahimi OA, Olsen SK, Umemori H, Mohammadi M, Ornitz DM. Receptor  
1072 Specificity of the Fibroblast Growth Factor Family: THE COMPLETE MAMMALIAN FGF  
1073 FAMILY. *J Biol Chem*. 2006 Jun 9;281(23):15694–700.
- 1074 25. Belteki G, Haigh J, Kabacs N, Haigh K, Sison K, Costantini F, et al. Conditional and  
1075 inducible transgene expression in mice through the combinatorial use of Cre-mediated  
1076 recombination and tetracycline induction. *Nucleic Acids Res*. 2005 Jan 1;33(5):e51–e51.
- 1077 26. White AC, Xu J, Yin Y, Smith C, Schmid G, Ornitz DM. FGF9 and SHH signaling  
1078 coordinate lung growth and development through regulation of distinct mesenchymal  
1079 domains. *Development*. 2006 Apr 15;133(8):1507–17.
- 1080 27. Scholzen T, Gerdes J. The Ki-67 protein: From the known and the unknown. *J Cell*  
1081 *Physiol*. 2000 Mar 1;182(3):311–22.
- 1082 28. Kelley MW. Cellular commitment and differentiation in the organ of Corti. *Int J Dev Biol*.  
1083 2007;51(6–7):571–83.
- 1084 29. Benito-Gonzalez A, Doetzlhofer A. Hey1 and Hey2 Control the Spatial and Temporal  
1085 Pattern of Mammalian Auditory Hair Cell Differentiation Downstream of Hedgehog  
1086 Signaling. *J Neurosci*. 2014 Sep 17;34(38):12865–76.
- 1087 30. Bermingham NA, Hassan BA, Price SD, Vollrath MA, Ben-Arie N, Eatock RA, et al. Math1:  
1088 an essential gene for the generation of inner ear hair cells. *Science*. 1999 Jun  
1089 11;284(5421):1837–41.
- 1090 31. Cai T, Seymour ML, Zhang H, Pereira FA, Groves AK. Conditional Deletion of Atoh1  
1091 Reveals Distinct Critical Periods for Survival and Function of Hair Cells in the Organ of  
1092 Corti. *J Neurosci*. 2013 Jun 12;33(24):10110–22.

- 1093 32. Woods C, Montcouquiol M, Kelley MW. Math1 regulates development of the sensory  
1094 epithelium in the mammalian cochlea. *Nat Neurosci*. 2004 Dec;7(12):1310–8.
- 1095 33. Munnamalai V, Hayashi T, Bermingham-McDonogh O. Notch Prosensory Effects in the  
1096 Mammalian Cochlea Are Partially Mediated by Fgf20. *J Neurosci*. 2012 Sep  
1097 12;32(37):12876–84.
- 1098 34. Pauley S, Lai E, Fritsch B. Foxg1 is required for morphogenesis and histogenesis of the  
1099 mammalian inner ear. *Dev Dyn*. 2006 Sep;235(9):2470–82.
- 1100 35. Brown AS, Epstein DJ. Otic ablation of smoothened reveals direct and indirect  
1101 requirements for Hedgehog signaling in inner ear development. *Development*. 2011 Sep  
1102 15;138(18):3967–76.
- 1103 36. Kanzaki S, Beyer LA, Swiderski DL, Izumikawa M, Stöver T, Kawamoto K, et al. p27Kip1  
1104 deficiency causes organ of Corti pathology and hearing loss. *Hear Res*. 2006 Apr  
1105 1;214(1):28–36.
- 1106 37. Ahmed M, Wong EYM, Sun J, Xu J, Wang F, Xu P-X. Eya1-Six1 Interaction Is Sufficient to  
1107 Induce Hair Cell Fate in the Cochlea by Activating Atoh1 Expression in Cooperation with  
1108 Sox2. *Dev Cell*. 2012 Feb;22(2):377–90.
- 1109 38. Kempfle JS, Turban JL, Edge ASB. Sox2 in the differentiation of cochlear progenitor cells.  
1110 *Sci Rep*. 2016;6:23293.
- 1111 39. Bosman EA, Quint E, Fuchs H, Hrabé de Angelis M, Steel KP. Catweasel mice: a novel  
1112 role for Six1 in sensory patch development and a model for branchio-oto-renal syndrome.  
1113 *Dev Biol*. 2009 Apr 15;328(2):285–96.
- 1114 40. Brooker R. Notch ligands with contrasting functions: Jagged1 and Delta1 in the mouse  
1115 inner ear. *Development*. 2006 Apr 1;133(7):1277–86.
- 1116 41. Kiernan AE, Ahituv N, Fuchs H, Balling R, Avraham KB, Steel KP, et al. The Notch ligand  
1117 Jagged1 is required for inner ear sensory development. *Proc Natl Acad Sci U S A*.  
1118 2001;98(7):3873–3878.
- 1119 42. Kiernan AE, Xu J, Gridley T. The Notch ligand JAG1 is required for sensory progenitor  
1120 development in the mammalian inner ear. *PLOS Genet*. 2006;2(1):e4.
- 1121 43. Kiernan AE, Li R, Hawes NL, Churchill GA, Gridley T. Genetic background modifies inner  
1122 ear and eye phenotypes of jag1 heterozygous mice. *Genetics*. 2007 Sep;177(1):307–11.
- 1123 44. Moayed Y, Basch ML, Pacheco NL, Gao SS, Wang R, Harrison W, et al. The Candidate  
1124 Splicing Factor Sfwap Regulates Growth and Patterning of Inner Ear Sensory Organs.  
1125 Wu DK, editor. *PLOS Genet*. 2014 Jan 2;10(1):e1004055.
- 1126 45. Tsai H, Hardisty RE, Rhodes C, Kiernan AE, Roby P, Tymowska-Lalanne Z, et al. The  
1127 mouse slalom mutant demonstrates a role for Jagged1 in neuroepithelial patterning in the  
1128 organ of Corti. *Hum Mol Genet*. 2001 Mar 1;10(5):507–12.

- 1129 46. Yamamoto N, Chang W, Kelley MW. Rbpj regulates development of prosensory cells in the  
1130 mammalian inner ear. *Dev Biol.* 2011 May;353(2):367–79.
- 1131 47. Basch ML, Ohyama T, Segil N, Groves AK. Canonical Notch Signaling Is Not Necessary  
1132 for Prosensory Induction in the Mouse Cochlea: Insights from a Conditional Mutant of  
1133 RBPj. *J Neurosci.* 2011 Jun 1;31(22):8046–58.
- 1134 48. Kopecky BJ, Jahan I, Fritsch B. Correct Timing of Proliferation and Differentiation is  
1135 Necessary for Normal Inner Ear Development and Auditory Hair Cell Viability: Mycs' Role  
1136 in Ear Development. *Dev Dyn.* 2013 Feb;242(2):132–47.
- 1137 49. Chen P, Johnson JE, Zoghbi HY, Segil N. The role of Math1 in inner ear development:  
1138 Uncoupling the establishment of the sensory primordium from hair cell fate determination.  
1139 *Development.* 2002 May;129(10):2495–505.
- 1140 50. Haque K, Pandey AK, Zheng H-W, Riazuddin S, Sha S-H, Puligilla C. MEKK4 Signaling  
1141 Regulates Sensory Cell Development and Function in the Mouse Inner Ear. *J Neurosci.*  
1142 2016 Jan 27;36(4):1347–61.
- 1143 51. Trokovic N, Trokovic R, Mai P, Partanen J. Fgfr1 regulates patterning of the pharyngeal  
1144 region. *Genes Dev.* 2003 Jan 1;17(1):141–53.
- 1145 52. Hayashi S, Lewis P, Pevny L, McMahon AP. Efficient gene modulation in mouse epiblast  
1146 using a Sox2Cre transgenic mouse strain. *Mech Dev.* 2002 Dec;119 Suppl 1:S97–101.
- 1147 53. Shaham O, Smith AN, Robinson ML, Taketo MM, Lang RA, Ashery-Padan R. Pax6 is  
1148 essential for lens fiber cell differentiation. *Development.* 2009 Aug 1;136(15):2567–78.
- 1149 54. Avinash GB, Nuttall AL, Raphael Y. 3-D analysis of F-actin in stereocilia of cochlear hair  
1150 cells after loud noise exposure. *Hear Res.* 1993 May 1;67(1):139–46.
- 1151 55. Mueller KL, Jacques BE, Kelley MW. Fibroblast Growth Factor Signaling Regulates Pillar  
1152 Cell Development in the Organ of Corti. *J Neurosci.* 2002 Nov 1;22(21):9368–77.
- 1153 56. Bermingham-McDonogh O, Oesterle EC, Stone JS, Hume CR, Huynh HM, Hayashi T.  
1154 Expression of Prox1 during mouse cochlear development. *J Comp Neurol.* 2006 May  
1155 10;496(2):172–86.

1156

## 1157 **Figure titles and legends**

1158

1159 **Fig 1. The Fgf20-KO cochlear phenotype is less severe than the Fgfr1-CKO**  
1160 **phenotype**

1161 (A, B) Whole mount cochlea from P0 *Fgf20<sup>+/-</sup>*, *Fgf20<sup>-/-</sup>*, *Foxg1<sup>Cre/+</sup>;Fgfr1<sup>flox/+</sup>*, and  
1162 *Foxg1<sup>Cre/+</sup>;Fgfr1<sup>flox/-</sup>* mice showing (A) inner and outer hair cells (IHC and OHC,  
1163 phalloidin, green) separated by inner pillar cells (p75NTR, red) and (B) supporting cells  
1164 (Prox1 and Sox2, green/yellow). Magnifications show the basal, middle, and apical turns  
1165 of the cochlea. Scale bar, 100  $\mu$ m (magnifications), 1 mm (whole).

1166 (C-F) Quantification of (C) cochlear duct length, (D) total IHCs and IHCs per 100  $\mu$ m of the  
1167 cochlear duct, (E) total OHCs and OHCs per 100  $\mu$ m, and (F) total supporting cells  
1168 (SCs) and SCs per 100  $\mu$ m at P0. *Fgf20<sup>+/-</sup>* and *Fgf20<sup>-/-</sup>* cochleae results were analyzed  
1169 by unpaired Student's t test; *Fgfr1<sup>flox/+</sup>*, *Fgfr1<sup>flox/-</sup>*, *Foxg1<sup>Cre/+</sup>;Fgfr1<sup>flox/+</sup>*, and  
1170 *Foxg1<sup>Cre/+</sup>;Fgfr1<sup>flox/-</sup>* cochleae results were analyzed by one-way ANOVA. P values  
1171 shown are from the t test and ANOVA. \* indicates  $p < 0.05$  from Student's t test or  
1172 Tukey's HSD (ANOVA post-hoc); n.s., not significant. Error bars, mean  $\pm$  SD.

1173 (G) Schematic showing the positions of basal, middle, and apical turns along the cochlear  
1174 duct.

1175 See also S1 Fig.

1176

1177 **Fig 2. FGFR1 but not FGF20 regulates Sox2 expression**

1178 (A) Sections through the middle turn of E14.5 cochlear ducts from *Fgf20<sup>+/-</sup>*, *Fgf20<sup>-/-</sup>*,  
1179 *Foxg1<sup>Cre/+</sup>;Fgfr1<sup>flox/+</sup>*, and *Foxg1<sup>Cre/+</sup>;Fgfr1<sup>flox/-</sup>* mice. RNA in situ hybridization (top) and  
1180 immunofluorescence for Sox2 (red, bottom), which is expressed in the prosensory  
1181 domain at this stage. Refer to schematic in (C).



1182 (B) Immunofluorescence for CDKN1B (green) in sections through the basal, middle, and  
1183 apical turns of E14.5 *Fgf20*<sup>+/-</sup>, *Fgf20*<sup>-/-</sup>, *Foxg1*<sup>Cre/+</sup>; *Fgfr1*<sup>flox/+</sup>, and *Foxg1*<sup>Cre/+</sup>; *Fgfr1*<sup>flox/-</sup>  
1184 cochleae.

1185 (C) Schematic of a cross section through the middle turn of the E14.5 cochlear duct,  
1186 showing the location of the prosensory domain (PD). Neural indicates the side of the  
1187 duct towards the spiral ganglion cells; abneural indicates away.

1188 (D) A model of genetic pathways during organ of Corti development. Ligand X/FGFR1  
1189 signaling regulates *Sox2* expression during prosensory specification; FGF20/FGFR1  
1190 signaling regulates differentiation. Ligand X may include FGF20, along with another  
1191 functionally redundant ligand.

1192 DAPI, nuclei (blue). Scale bar, 100  $\mu$ m. See also S2 Fig.

1193

1194 **Fig 3. Genetic rescue of the *Fgf20*-KO phenotype suggests that FGF20 is required**  
1195 **for differentiation**

1196 (A, B) Whole mount cochlea from P0 *Fgf20*<sup>+/-</sup>; *ROSA*<sup>rtTA</sup> (*Fgf20*-het), *Fgf20*<sup>+/-</sup>; *ROSA*<sup>rtTA</sup>; TRE-  
1197 *Fgf9*-IRES-eGfp (*Fgf9*-OA), *Fgf20*<sup>-/-</sup>; *ROSA*<sup>rtTA</sup> (*Fgf20*-null), and *Fgf20*<sup>-/-</sup>; *ROSA*<sup>rtTA</sup>; TRE-  
1198 *Fgf9*-IRES-eGfp (*Fgf20*-rescue) mice showing (A) inner and outer hair cells (phalloidin,  
1199 green) separated by inner pillar cells (p75NTR, red) and (B) supporting cells (*Prox1* and  
1200 *Sox2*, green/yellow). Images from basal, middle, and apical turns of the cochlea are  
1201 shown. *Fgf20*-rescue cochleae from four different doxycycline chow (Dox) regimens are  
1202 shown (E13.5-E15.5, E13.5, E14.5, and E15.5). *Fgf20*-het, *Fgf9*-OA, and *Fgf20*-null  
1203 cochleae shown are from the E13.5-E15.5 Dox regimen. Scale bar, 100  $\mu$ m.

1204 (C) Quantification of outer hair cells (OHC) and supporting cells (SC) from P0 *Fgf9*-OA (Dox  
1205 regimen: E13.5-E15.5), *Fgf20*-null (Dox regimen: E13.5-E15.5), and *Fgf20*-rescue (all  
1206 four Dox regimens) cochleae, presented as a percentage of the number of cells in

1207 Fgf20-het cochleae from the same Dox regimen. \* indicates  $p < 0.05$  compared to Fgf20-  
1208 null cochleae from the same Dox regimen; ^ indicates  $p < 0.05$  compared to Fgf20-het  
1209 cochleae from the same Dox regimen; Tukey's HSD (one-way ANOVA post-hoc).

1210 See also S3 Fig.

1211

1212 **Fig 4. Decrease in Sox2 expression results in similar phenotypes as disruptions**  
1213 **to FGFR1 signaling**

1214 (A, B) Whole mount cochlea from P0 mice from the Sox2 allelic series (in order of highest to  
1215 lowest levels of Sox2 expression: Sox2<sup>+/+</sup>, Sox2<sup>Ysb/+</sup>, Sox2<sup>Ysb/Ysb</sup>, and Sox2<sup>Ysb/-</sup>) showing  
1216 (A) inner and outer hair cells (phalloidin, green) separated by inner pillar cells (p75NTR,  
1217 red) and (B) supporting cells (Prox1 and Sox2, green/yellow). Magnifications show the  
1218 basal, middle, and apical turns of the cochlea. Arrowheads indicate ectopic inner hair  
1219 cells. Scale bar, 100  $\mu\text{m}$  (magnifications), 1 mm (whole).

1220 (C-F) Quantification of (C) cochlear duct length, (D) total inner hair cells (IHCs) and IHCs per  
1221 100  $\mu\text{m}$  of the cochlear duct, (E) total outer hair cells (OHCs) and OHCs per 100  $\mu\text{m}$ ,  
1222 and (F) total supporting cells (SCs) and SCs per 100  $\mu\text{m}$  at P0. P values shown are from  
1223 one-way ANOVA. \* indicates  $p < 0.05$  from Tukey's HSD (ANOVA post-hoc). Error bars,  
1224 mean  $\pm$  SD.

1225 See also S4 Fig.

1226

1227 **Fig 5. Decrease in levels of Sox2 expression delays prosensory specification**

1228 (A) Serial sections (1-6) through the duct of E14.5 and E15.5 Sox2<sup>Ysb/+</sup> and Sox2<sup>Ysb/-</sup>  
1229 cochleae. Immunofluorescence for Ki67 (red) and DAPI (nuclei, cyan). Cochlear  
1230 epithelium is outlined. Bracket indicates prosensory domain. \* indicates shift of  
1231 prosensory nuclei away from the luminal surface of the epithelium. N, neural side. Scale

1232 bar, 100  $\mu$ m. Whole mount cochlear duct schematics show relative positions of the serial  
1233 sections and progression of cell cycle exit (green arrow).  
1234 (B) A model of organ of Corti development showing embryonic staging (x-axis) and location  
1235 along the cochlear duct (basal, middle, and apical turns, y-axis). Development occurs in  
1236 two stages: unspecified progenitors (tan shading) undergo specification and cell cycle  
1237 exit to become prosensory cells (green shading), which then differentiate into hair cells  
1238 and supporting cells (HCs & SCs; red shading). In wildtype cochleae, cell cycle exit  
1239 (indicating completion of specification) begins at the apex of the cochlea and proceeds  
1240 basally. Afterwards, differentiation initiates at the mid-base of the cochlea and proceeds  
1241 basally and apically. Temporal buffer (green shading) refers to the time between cell  
1242 cycle exit and initiation of differentiation. In *Sox2* hypomorph cochleae, specification and  
1243 cell cycle exit are delayed, resulting in failure to complete specification before initiation of  
1244 differentiation towards the basal end of the cochlea (crosshatch pattern).

1245 See also S5 Fig.

1246

### 1247 **Fig 6. *Sox2* is upstream of *Fgf20***

1248 (A-C) Sections through the middle turn of E14.5 cochleae.

1249 (A) RNA in situ hybridization for *Etv4* and *Etv5* in *Sox2*<sup>Ysb/+</sup> and *Sox2*<sup>Ysb/-</sup> cochleae. The two  
1250 brackets indicate *Etv4/5* expression in the outer sulcus (OS, left) and prosensory domain  
1251 (PD, right). Refer to schematic at the bottom right of the figure.

1252 (B) RNA in situ hybridization for *Fgfr1* and *Fgf20* in *Sox2*<sup>Ysb/+</sup> and *Sox2*<sup>Ysb/-</sup> cochleae. Bracket  
1253 indicates *Fgfr1/Fgf20* expression in the prosensory domain.

1254 (C) RNA in situ hybridization for *Fgf20* in *Foxg1*<sup>Cre/+</sup>;*Fgfr1*<sup>flox/+</sup> and *Foxg1*<sup>Cre/+</sup>;*Fgfr1*<sup>flox/-</sup>  
1255 cochleae. Bracket indicates *Fgf20* expression in the prosensory domain.

1256 (D) Serial sections (1-6) through the duct of E14.5 *Fgf20*<sup>+/-</sup> and *Fgf20*<sup>-/-</sup> cochleae.

1257 Immunofluorescence for Ki67 (red) and DAPI (nuclei, cyan). Cochlear epithelium is

1258 outlined. Bracket indicates prosensory domain. \* indicates shift of prosensory nuclei  
1259 away from the luminal surface of the epithelium. N, neural side. Scale bar, 100  $\mu$ m.  
1260 Whole mount cochlear duct schematics show relative positions of the serial sections and  
1261 progression of cell cycle exit (green arrow).  
1262 OS, outer sulcus; PD, prosensory domain; KO, Kölliker's organ. Scale bar, 100  $\mu$ m. See also S6  
1263 Fig.

1264

### 1265 **Fig 7. Sox2 and Fgf20 interact during cochlea development**

1266 (A, B) Whole mount cochlea from P0 *Fgf20*<sup>+/-</sup>;*Sox2*<sup>Ysb/+</sup>, *Fgf20*<sup>+/-</sup>;*Sox2*<sup>Ysb/Ysb</sup>, *Fgf20*<sup>-/-</sup>;*Sox2*<sup>Ysb/+</sup>,  
1267 and *Fgf20*<sup>-/-</sup>;*Sox2*<sup>Ysb/Ysb</sup> mice showing (A) inner and outer hair cells (phalloidin, green)  
1268 separated by inner pillar cells (p75NTR, red) and (B) supporting cells (Prox1 and Sox2,  
1269 green/yellow). Magnifications show the basal, middle, and apical turns of the cochlea.  
1270 Arrowheads indicate ectopic inner hair cells. Scale bar, 100  $\mu$ m (magnifications), 1 mm  
1271 (whole).

1272

### 1273 **Fig 8. Sox2 and Fgf20 interact during cochlea development—quantitative analysis**

1274 (A) P values from two-way ANOVA analyzing the quantification results in (B-E). The two  
1275 factors analyzed are *Fgf20* (*Fgf20*<sup>+/+</sup>, *Fgf20*<sup>+/-</sup>, *Fgf20*<sup>-/-</sup>) and *Sox2* (*Sox2*<sup>+/+</sup>, *Sox2*<sup>Ysb/+</sup>,  
1276 *Sox2*<sup>Ysb/Ysb</sup>) gene dosage. A p value < 0.05 (yellow highlight) for *Fgf20* or *Sox2* indicates  
1277 that the particular factor (independent variable) has a statistically significant effect on the  
1278 measurement (dependent variable). Whereas a p value < 0.05 (orange highlight) for  
1279 Interaction indicates a statistically significant interaction between the effects of the two  
1280 factors on the measurement.

1281 (B-E) Quantification of (B) cochlear duct length, (C) total inner hair cells (IHCs) and IHCs per  
1282 100  $\mu$ m of the cochlear duct, (D) total outer hair cells (OHCs) and OHCs per 100  $\mu$ m,

1283 and (E) total supporting cells (SCs) and SCs per 100  $\mu\text{m}$  at P0 in  $Fgf20^{+/+}; Sox2^{+/+}$ ,  
1284  $Fgf20^{+/+}; Sox2^{Ysb/+}$ ,  $Fgf20^{+/-}; Sox2^{+/+}$ ,  $Fgf20^{+/-}; Sox2^{Ysb/+}$ ,  $Fgf20^{+/+}; Sox2^{Ysb/Ysb}$ ,  
1285  $Fgf20^{+/-}; Sox2^{Ysb/Ysb}$ ,  $Fgf20^{-/-}; Sox2^{+/+}$ ,  $Fgf20^{-/-}; Sox2^{Ysb/+}$ , and  $Fgf20^{-/-}; Sox2^{Ysb/Ysb}$  cochleae.  
1286 Error bars, mean  $\pm$  SD.  
1287 (F) Results from post-hoc Tukey's HSD analyzing the quantification results in (B-E). Letters  
1288 (L, I, J, O, P, S, T; representing each measurement in panels B-E) indicate a statistically  
1289 significant decrease ( $p < 0.05$ ) when comparing the row genotype against the column  
1290 genotype. L, cochlear length; I, total IHCs; J, IHCs/100  $\mu\text{m}$ ; O, total OHCs; P, OHCs/100  
1291  $\mu\text{m}$ ; S, total SCs; T, SCs/100  $\mu\text{m}$ .

1292 See also S7 and S8 Figs.

1293

1294 **Fig 9. Loss of Fgf20 does not further delay prosensory specification in Sox2**  
1295 **hypomorph cochleae**

1296 (A) The  $Fgf20^{-/-}$ ,  $Foxg1^{Cre/+}; Fgfr1^{flox/-}$ ,  $Fgf20^{-/-}; Sox2^{Ysb/Ysb}$ , and  $Sox2^{Ysb/-}$  cochleae phenotypes  
1297 lie along a continuum, preferentially affecting outer and basal cochlear sensory  
1298 epithelium, likely attributable to varying Sox2 levels on an  $Fgf20$ -null background.

1299 (B) Serial sections (1-6) through the duct of E14.5  $Fgf20^{+/+}; Sox2^{Ysb/+}$ ,  $Fgf20^{+/-}; Sox2^{Ysb/Ysb}$ ,  
1300  $Fgf20^{-/-}; Sox2^{Ysb/+}$ , and  $Fgf20^{-/-}; Sox2^{Ysb/Ysb}$  cochleae. Immunofluorescence for Ki67 (red)  
1301 and DAPI (nuclei, cyan). Cochlear epithelium is outlined. Bracket indicates prosensory  
1302 domain. \* indicates shift of prosensory nuclei away from the luminal surface of the  
1303 epithelium. N, neural side. Whole mount cochlear duct schematics show relative  
1304 positions of the serial sections and progression of cell cycle exit (green arrow). Note:  
1305 unlike in Fig 7, we have switched the placement of images from  $Fgf20^{-/-}; Sox2^{Ysb/+}$  and  
1306  $Fgf20^{+/+}; Sox2^{Ysb/Ysb}$  cochleae to facilitate comparison.

1307 Scale bar, 100  $\mu\text{m}$ . See also S10 Fig.

1308

1309 **Fig 10. Fgf20-KO organ of Corti exhibits premature differentiation**

1310 (A) RNA in situ hybridization for *Hey1* and *Hey2* on sections through the middle turn of  
1311 E14.5 *Fgf20*<sup>+/-</sup> and *Fgf20*<sup>-/-</sup> cochleae.  
1312 (B, C) Immunofluorescence for Myo6 (red) on “mid-modiolar” sections through the (B) E14.5  
1313 *Fgf20*<sup>+/-</sup> and *Fgf20*<sup>-/-</sup> cochleae, and (C) E15.0 *Fgf20*-het (*Fgf20*<sup>Cre/+</sup>; *ROSA*<sup>rtTA/+</sup>), *Fgf20*-null  
1314 (*Fgf20*<sup>Cre/βgal</sup>; *ROSA*<sup>rtTA/+</sup>), *Fgf9*-OA (*Fgf20*<sup>Cre/+</sup>; *ROSA*<sup>rtTA/+</sup>; TRE-*Fgf9*-IRES-eGfp), *Fgf20*-  
1315 rescue (*Fgf20*<sup>Cre/βgal</sup>; *ROSA*<sup>rtTA/+</sup>; TRE-*Fgf9*-IRES-eGfp) cochleae (Dox from E13.5 to  
1316 E15.0), with magnification. The number of cochleae containing Myo6-expressing cells  
1317 out of the total number of cochleae examined for each genotype are shown below each  
1318 panel. Arrows indicate Myo6-expressing hair cells. DAPI, nuclei (blue).  
1319 OS, outer sulcus; PD, prosensory domain; KO, Kölliker’s organ. Scale bar, 100 μm.

1320

1321 **Fig 11. Sox2 and Fgf20 interact to modulate a temporal buffer between**  
1322 **specification and differentiation**

1323 Model of the roles of *Sox2* and *Fgf20* in organ of Corti development, which occurs in two stages:  
1324 unspecified progenitors (tan shading) undergo specification and cell cycle exit to become  
1325 prosensory cells (green shading), which then differentiate into hair cells and supporting cells  
1326 (HCs & SCs; red shading). In wildtype cochleae, cell cycle exit (indicating completion of  
1327 specification) begins at the apex of the cochlea and proceeds basally. Afterwards, differentiation  
1328 initiates at the mid-base of the cochlea and proceeds basally and apically. The prosensory cells  
1329 exist within a temporal buffer (green shading), defined as the time between cell cycle exit and  
1330 initiation of differentiation. In *Sox2/Fgf20* mutant cochleae, decrease in levels of *Sox2*  
1331 expression in the developing cochlea leads to delayed prosensory specification and cell cycle  
1332 exit (arrow 1), while loss of *Fgf20* leads to premature onset of differentiation at the basal and

1333 mid-basal cochlear turns (arrow 2) as well as delayed differentiation at the apical turn (arrow 3).  
1334 Loss of both *Sox2* and *Fgf20* leads to loss of the temporal buffer between specification and  
1335 differentiation towards the base of the cochlear duct, disrupting the development of HCs and  
1336 SCs in the basal region (crosshatch pattern).

1337

1338

## 1339 **Supplemental figure titles and legends**

1340

### 1341 **S1 Fig.**

1342 (A-C) Quantification of length-normalized number of (A) inner hair cells (IHCs/100  $\mu\text{m}$ ), (B)  
1343 outer hair cells (OHCs/100  $\mu\text{m}$ ), and (C) supporting cells (SCs/100  $\mu\text{m}$ ) in the basal,  
1344 middle, and apical turns of P0 cochleae from *Fgf20*<sup>+/-</sup>, *Fgf20*<sup>-/-</sup> *Fgfr1*<sup>flox/+</sup>, *Fgfr1*<sup>flox/-</sup>,  
1345 *Foxg1*<sup>Cre/+</sup>;*Fgfr1*<sup>flox/+</sup>, and *Foxg1*<sup>Cre/+</sup>;*Fgfr1*<sup>flox/-</sup> mice. *Fgf20*<sup>+/-</sup> and *Fgf20*<sup>-/-</sup> cochleae were  
1346 analyzed by unpaired Student's t test; *Fgfr1*<sup>flox/+</sup>, *Fgfr1*<sup>flox/-</sup>, *Foxg1*<sup>Cre/+</sup>;*Fgfr1*<sup>flox/+</sup>, and  
1347 *Foxg1*<sup>Cre/+</sup>;*Fgfr1*<sup>flox/-</sup> cochleae were analyzed by one-way ANOVA. P values shown are  
1348 from the t test and ANOVA. \* indicates  $p < 0.05$  from Student's t test or Tukey's HSD  
1349 (ANOVA post-hoc); n.s., not significant. Error bars, mean  $\pm$  SD.

1350 (D) Schematic showing the positions of basal, middle, and apical turns along the cochlear  
1351 duct. Apical tip refers to the apical end of the cochlea.

1352 (E) Whole mount cochlea from P0 *Fgf20*<sup>+/-</sup>, *Fgf20*<sup>-/-</sup>, *Foxg1*<sup>Cre/+</sup>;*Fgfr1*<sup>flox/+</sup>, and  
1353 *Foxg1*<sup>Cre/+</sup>;*Fgfr1*<sup>flox/-</sup> mice showing immunofluorescence for phalloidin (green) and  
1354 p75NTR (red) at the apical tip of the cochlea. T, towards the tip. Scale bar, 100  $\mu\text{m}$ .

1355

1356 **S2 Fig.**

1357 (A, B) Sections through the middle turn of E14.5 cochlear ducts from *Fgf20<sup>+/-</sup>*, *Fgf20<sup>-/-</sup>*,  
1358 *Foxg1<sup>Cre/+</sup>;Fgfr1<sup>flox/+</sup>*, and *Foxg1<sup>Cre/+</sup>;Fgfr1<sup>flox/-</sup>* mice. Scale bar, 100  $\mu$ m. Refer to  
1359 schematic below. OS, outer sulcus; PD, prosensory domain; KO, Kölliker's organ.  
1360 (A) RNA in situ hybridization for *Etv4* and *Etv5*. The two brackets indicate *Etv4/5* expression  
1361 in the outer sulcus (OS, left) and prosensory domain (PD, right; lost in *Fgf20<sup>-/-</sup>* and  
1362 *Foxg1<sup>Cre/+</sup>;Fgfr1<sup>flox/-</sup>* cochleae).  
1363 (B) EdU-incorporation (green). Dashed region indicates Kölliker's organ (KO). DAPI, nuclei  
1364 (blue).

1365

1366 **S3 Fig.**

1367 Quantification of length-normalized number of inner hair cells (IHCs/100  $\mu$ m), outer hair cells  
1368 (OHCs/100  $\mu$ m), and supporting cells (SCs/100  $\mu$ m) overall (along the entire cochlea; top three  
1369 graphs) and in the basal, middle, and apical turns (bottom three graphs) of P0 cochleae from  
1370 *Fgf20<sup>+/-</sup>;ROSA<sup>rtTA</sup>* (Fgf20-het), *Fgf20<sup>+/-</sup>;ROSA<sup>rtTA</sup>*; TRE-Fgf9-IRES-eGfp (Fgf9-OA), *Fgf20<sup>-/-</sup>*  
1371 *;ROSA<sup>rtTA</sup>* (Fgf20-null), and *Fgf20<sup>-/-</sup>;ROSA<sup>rtTA</sup>*; TRE-Fgf9-IRES-eGfp (Fgf20-rescue) mice. Dox  
1372 regimens: E13.5-E15.5, E13.5, E14.5, or E15.5. P values shown are from one-way ANOVA. \*  
1373 indicates  $p < 0.05$  from Tukey's HSD (ANOVA post-hoc); n.s., not significant. Error bars, mean  $\pm$   
1374 SD. Summarized in Fig 3C.

1375

1376 **S4 Fig.**

1377 (A-C) Quantification of length-normalized number of (A) inner hair cells (IHCs/100  $\mu$ m), (B)  
1378 outer hair cells (OHCs/100  $\mu$ m), and (C) supporting cells (SCs/100  $\mu$ m) in the basal,  
1379 middle, and apical turns of P0 cochleae from *Sox2<sup>+/+</sup>*, *Sox2<sup>Ysb/+</sup>*, *Sox2<sup>Ysb/Ysb</sup>*, and *Sox2<sup>Ysb/-</sup>*



1380 mice. P values shown are from one-way ANOVA. \* indicates  $p < 0.05$  from Tukey's HSD  
1381 (ANOVA post-hoc); n.s., not significant. Error bars, mean  $\pm$  SD.  
1382 (D) Whole mount cochlea from P0  $Sox2^{Ysb/-}$  mice showing presence of inner and outer hair  
1383 cells (phalloidin/p75NTR) and supporting cells (Prox1/Sox2, in a different cochlea) at the  
1384 basal tip. Schematic shows the location of sensory epithelium at the apical turn and  
1385 basal tip of  $Sox2^{Ysb/-}$  cochleae. Scale bar, 1 mm (whole), 100  $\mu$ m (basal tip).

1386

1387 **S5 Fig.**

1388 (A, B) Immunofluorescence for (A) Sox2 (red) and (B) CKDN1B (green) in sections through the  
1389 basal, middle, and apical turns of E14.5  $Sox2^{Ysb/+}$  and  $Sox2^{Ysb/-}$  cochleae.  
1390 (C) Immunofluorescence for Ki67 (red) on serial "mid-modiolar" sections through the E14.5  
1391 and E15.5  $Sox2^{Ysb/+}$  and  $Sox2^{Ysb/-}$  cochleae. Brackets indicate prosensory domain. Nine  
1392 sections through the length of the cochlear duct are labeled. See whole mount cochlear  
1393 duct schematic (lower left) for relative positions of the sections.  
1394 DAPI, nuclei (blue). Scale bar, 100  $\mu$ m.

1395

1396 **S6 Fig.**

1397 (A) Immunofluorescence for Ki67 (red) on serial "mid-modiolar" sections through the E14.5  
1398  $Fgf20^{+/-}$  and  $Fgf20^{-/-}$  cochleae. Brackets indicate prosensory domain. Nine sections  
1399 through the length of the cochlear duct are labeled. See whole mount cochlear duct  
1400 schematic (right) for relative positions of the sections.  
1401 (B) EdU-incorporation (green) in sections through the middle turn of E14.5  $Sox2^{Ysb/+}$  and  
1402  $Sox2^{Ysb/-}$  cochleae. Dashed region indicates Kölliker's organ (KO). Bracket indicates part  
1403 of Kölliker's organ without EdU-incorporating cells in  $Sox2^{Ysb/-}$  cochleae.

1404 OS, outer sulcus; PD, prosensory domain; KO, Kölliker's organ. DAPI, nuclei (blue). Scale bar,  
1405 100  $\mu\text{m}$ .

1406

1407 **S7 Fig.**

1408 (A) P values from two-way ANOVA analyzing the quantification in (B-D). The two factors  
1409 analyzed are *Fgf20* (*Fgf20*<sup>+/+</sup>, *Fgf20*<sup>+/-</sup>, *Fgf20*<sup>-/-</sup>) and *Sox2* (*Sox2*<sup>+/+</sup>, *Sox2*<sup>Ysb/+</sup>, *Sox2*<sup>Ysb/Ysb</sup>)  
1410 gene dosage. A p value < 0.05 (yellow highlight) for *Fgf20* or *Sox2* indicates that the  
1411 particular factor (independent variable) has a statistically significant effect on the  
1412 measurement (dependent variable). Whereas a p value < 0.05 for Interaction indicates a  
1413 statistically significant interaction between the effects of the two factors on the  
1414 measurement.

1415 (B-D) Quantification of length-normalized number of (B) inner hair cells (IHCs/100  $\mu\text{m}$ ), (C)  
1416 outer hair cells (OHCs/100  $\mu\text{m}$ ), and (D) supporting cells (SCs/100  $\mu\text{m}$ ) in the basal,  
1417 middle, and apical turns of P0 cochleae from *Fgf20*<sup>+/+</sup>;*Sox2*<sup>+/+</sup>, *Fgf20*<sup>+/+</sup>;*Sox2*<sup>Ysb/+</sup>,  
1418 *Fgf20*<sup>+/-</sup>;*Sox2*<sup>+/+</sup>, *Fgf20*<sup>+/-</sup>;*Sox2*<sup>Ysb/+</sup>, *Fgf20*<sup>+/+</sup>;*Sox2*<sup>Ysb/Ysb</sup>, *Fgf20*<sup>+/-</sup>;*Sox2*<sup>Ysb/Ysb</sup>, *Fgf20*<sup>-/-</sup>;  
1419 *Sox2*<sup>+/+</sup>, *Fgf20*<sup>-/-</sup>;*Sox2*<sup>Ysb/+</sup>, and *Fgf20*<sup>-/-</sup>;*Sox2*<sup>Ysb/Ysb</sup> mice. Error bars, mean  $\pm$  SD.

1420

1421 **S8 Fig.**

1422 Results from post-hoc Tukey's HSD analyzing the quantification results in (B-D). Letters (L, I, J,  
1423 O, P, S, T; representing each measurement in S7B-S7D Figs) indicate a statistically significant  
1424 decrease (p < 0.05) when comparing the row genotype against the column genotype. L,  
1425 cochlear length; I, IHCs/100  $\mu\text{m}$ ; O, OHCs/100  $\mu\text{m}$ ; S, SCs/100  $\mu\text{m}$ .

1426

1427 **S9 Fig.**

1428 (A) Whole mount cochlea from P0  $Fgf20^{+/+};Sox2^{+/+}$ ,  $Fgf20^{+/-};Sox2^{+/+}$ ,  $Fgf20^{+/+};Sox2^{Ysb/+}$ , and  
1429  $Fgf20^{+/-};Sox2^{Ysb/+}$  mice showing inner and outer hair cells (phalloidin, green) separated  
1430 by inner pillar cells (p75NTR, red). Magnifications show the basal, middle, and apical  
1431 turns of the cochlea. Scale bar, 100  $\mu$ m (magnifications), 1 mm (whole); arrowheads  
1432 indicate ectopic inner hair cells.

1433 (B-F) Quantification of (B) cochlear duct length, (C) total inner hair cells (IHCs) and IHCs per  
1434 100  $\mu$ m of the cochlear duct, (D) total outer hair cells (OHCs) and OHCs per 100  $\mu$ m,  
1435 and (E) IHCs/100  $\mu$ m and (F) OHCs/100  $\mu$ m in the basal, middle, and apical turns at P0.  
1436 P values shown are from one-way ANOVA. \* indicates  $p < 0.05$  from Tukey's HSD  
1437 (ANOVA post-hoc); n.s., not significant. Error bars, mean  $\pm$  SD.

1438

1439 **S10 Fig.**

1440 (A, B) Immunofluorescence for (A) Sox2 (red) and (B) CDKN1B (green) in sections through the  
1441 basal, middle, and apical turns of E14.5  $Fgf20^{+/-};Sox2^{Ysb/+}$ ,  $Fgf20^{-/-};Sox2^{Ysb/+}$ ,  
1442  $Fgf20^{+/-};Sox2^{Ysb/Ysb}$ , and  $Fgf20^{-/-};Sox2^{Ysb/Ysb}$  cochleae.

1443 (C) EdU-incorporation (green) in sections through the middle turn of E14.5  $Fgf20^{+/-};Sox2^{Ysb/+}$ ,  
1444  $Fgf20^{-/-};Sox2^{Ysb/+}$ ,  $Fgf20^{+/-};Sox2^{Ysb/Ysb}$ , and  $Fgf20^{-/-};Sox2^{Ysb/Ysb}$  cochleae. Dashed region  
1445 indicates Kölliker's organ (KO).

1446 (D) Immunofluorescence for Ki67 (red) on serial "mid-modiolar" sections through the E14.5  
1447  $Fgf20^{+/-};Sox2^{Ysb/+}$ ,  $Fgf20^{-/-};Sox2^{Ysb/+}$ ,  $Fgf20^{+/-};Sox2^{Ysb/Ysb}$ , and  $Fgf20^{-/-};Sox2^{Ysb/Ysb}$   
1448 cochleae. Brackets indicate prosensory domain. Nine sections through the length of the  
1449 cochlear duct are labeled. See whole mount cochlear duct schematic (upper right) for  
1450 relative positions of the sections.

1451 Note: unlike in Fig 7, we have switched the placement of images from *Fgf20*<sup>-/-</sup>;*Sox2*<sup>Ysb/+</sup> and  
1452 *Fgf20*<sup>+/-</sup>;*Sox2*<sup>Ysb/Ysb</sup> cochleae to facilitate comparison. OS, outer sulcus; PD, prosensory domain;  
1453 KO, Kölliker's organ. DAPI, nuclei (blue). Scale bar, 100 μm.

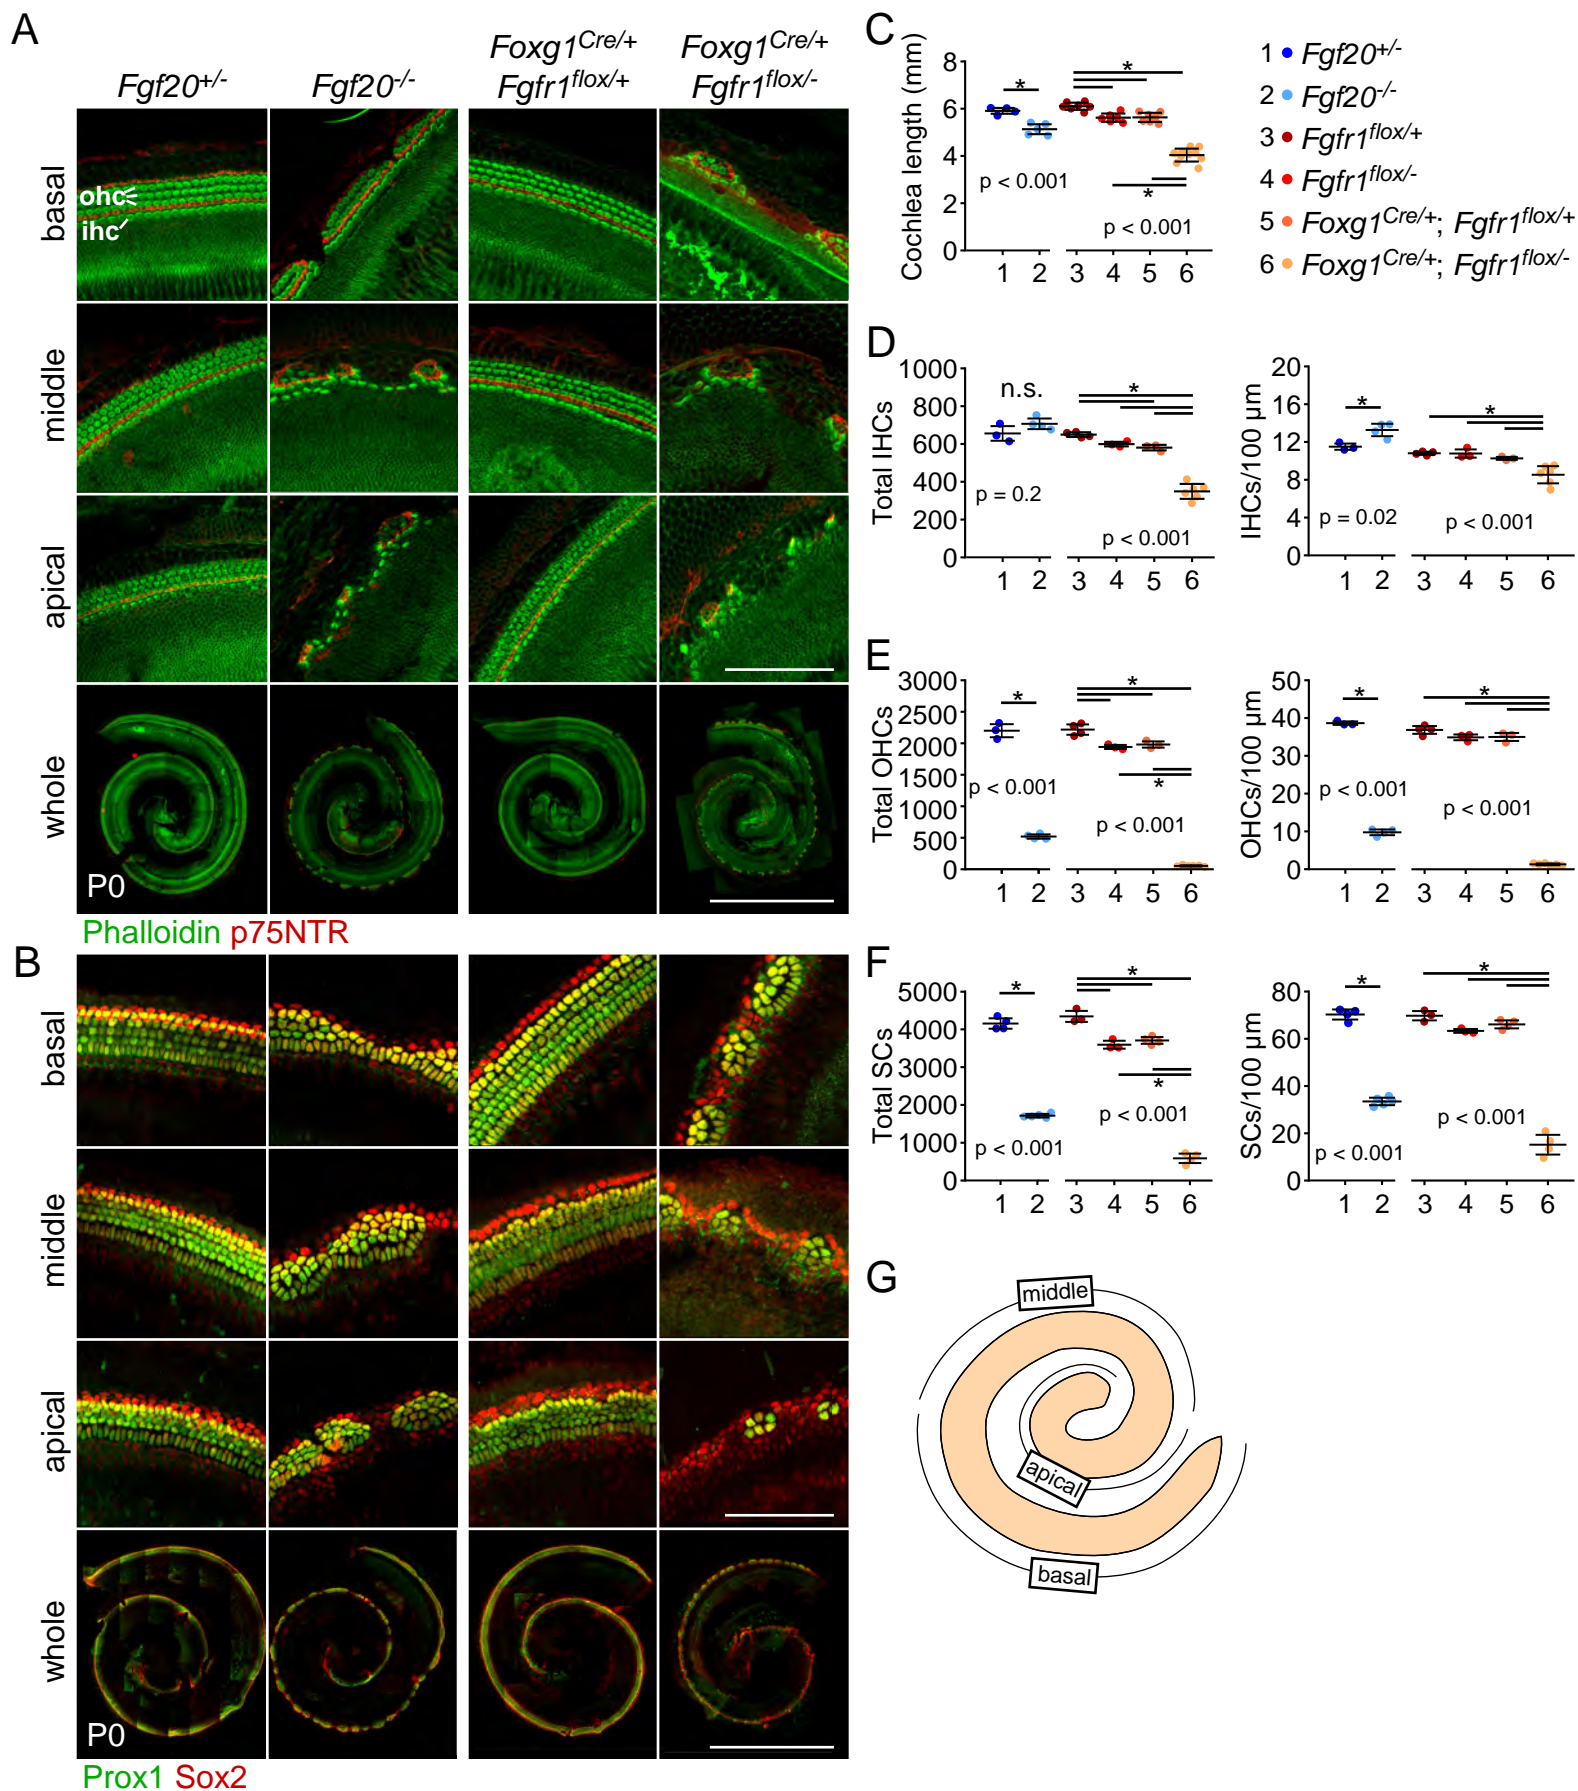

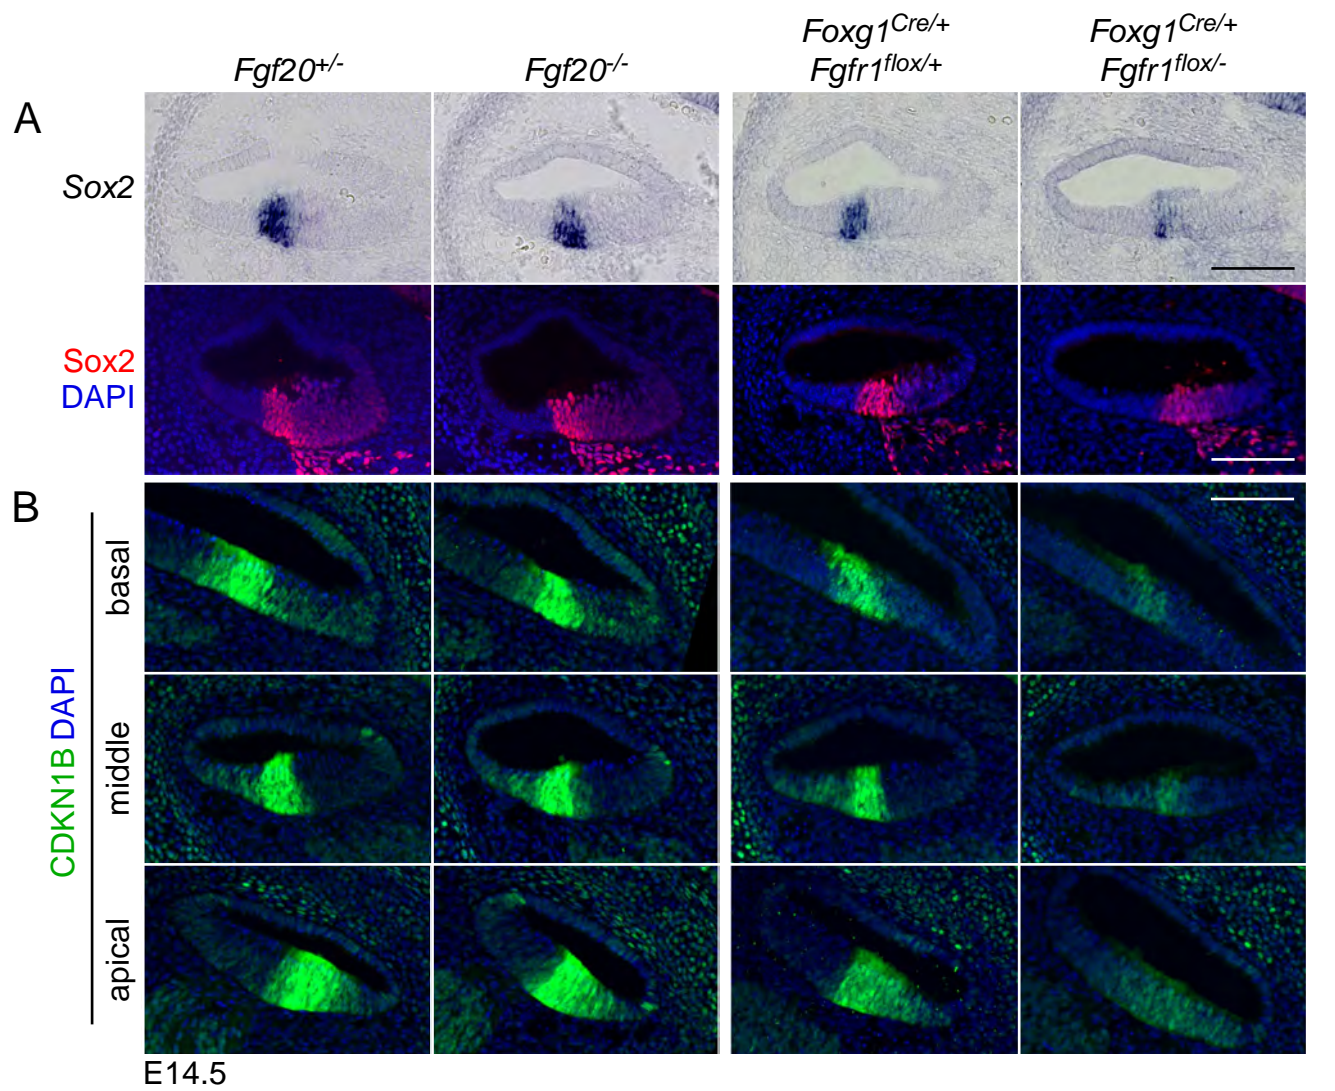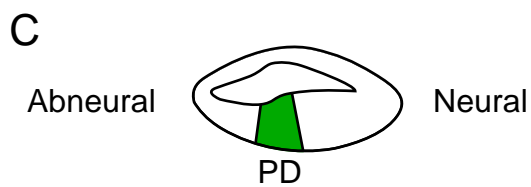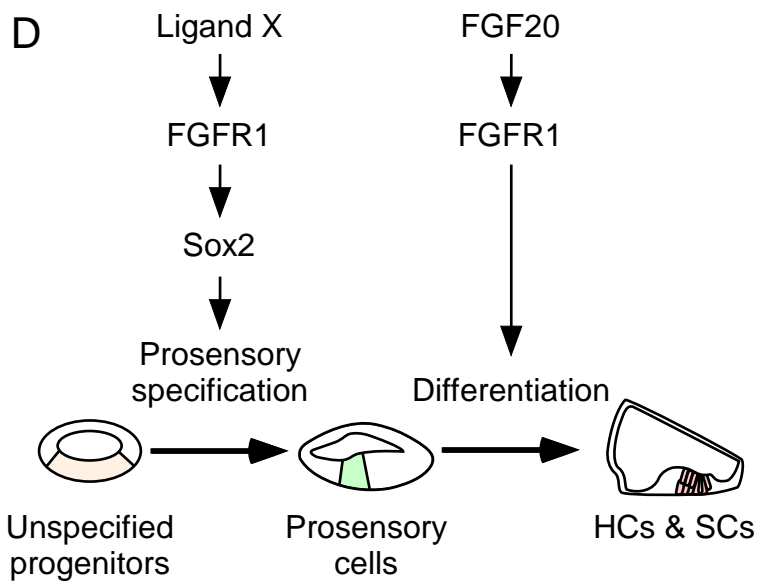

Fgf20-rescue

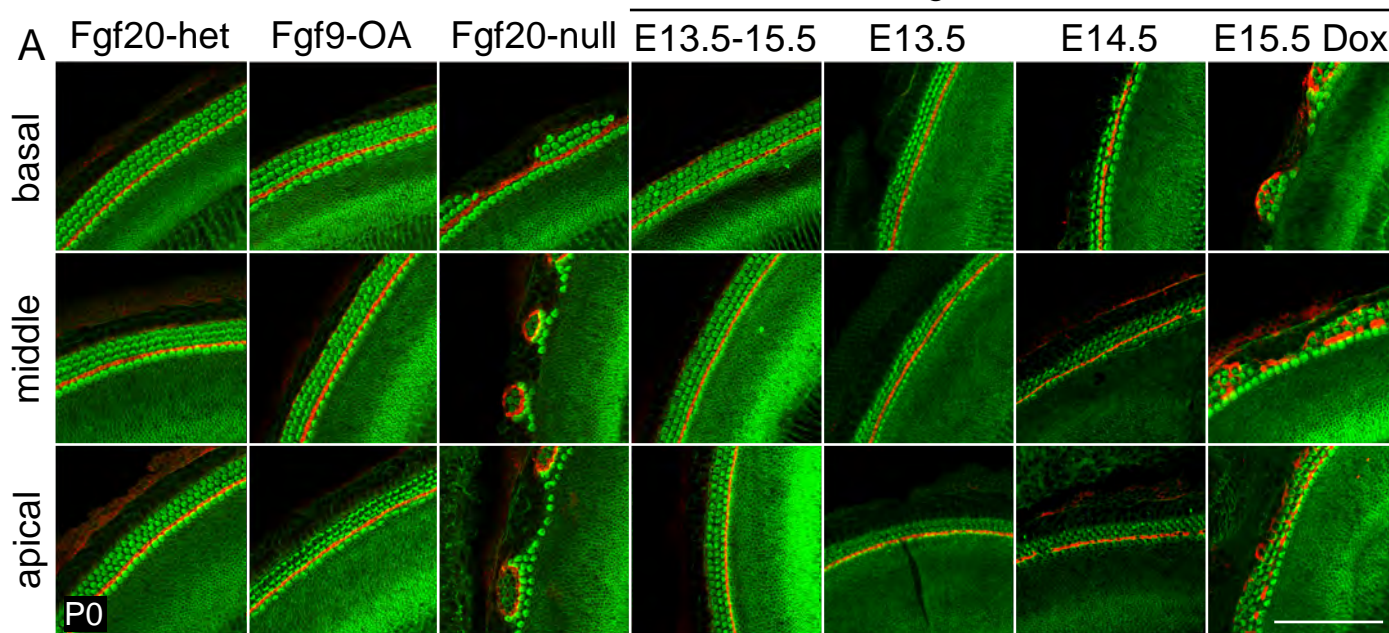

Phalloidin p75NTR

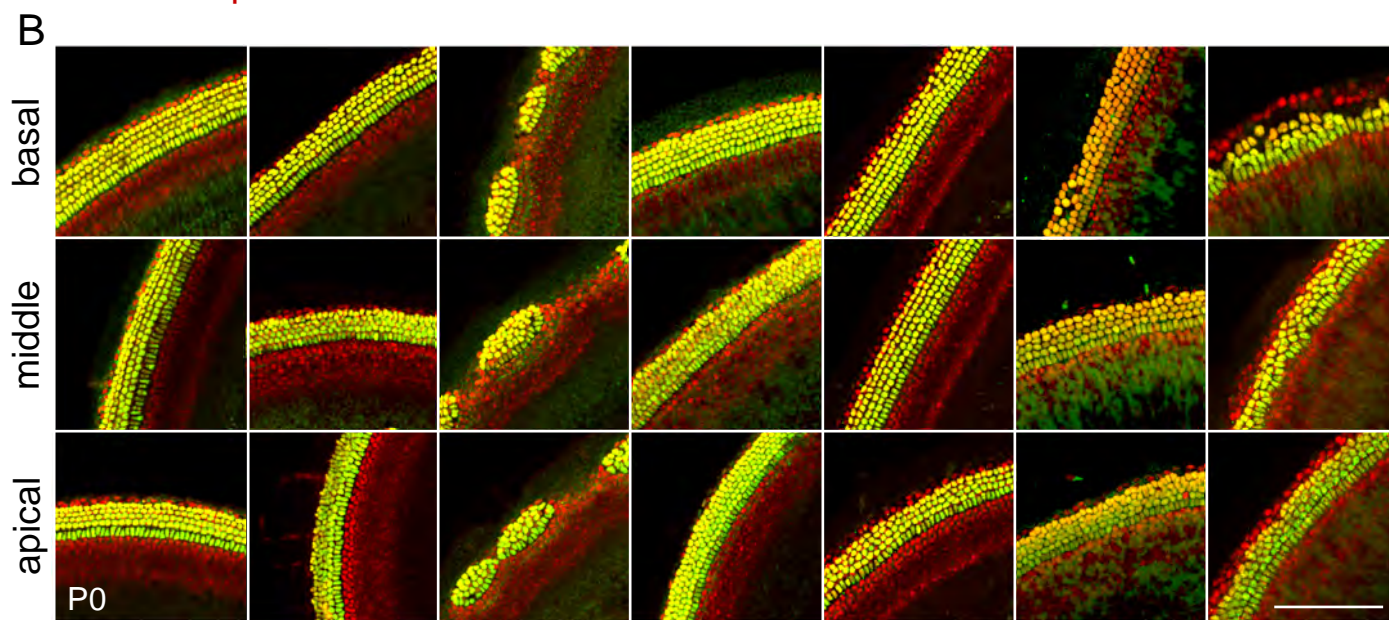

Prox1 Sox2

**C**

|            |        | Fgf20-rescue |            |            |         |        |           |
|------------|--------|--------------|------------|------------|---------|--------|-----------|
|            |        | Fgf9-OA      | Fgf20-null | E13.5-15.5 | E13.5   | E14.5  | E15.5 Dox |
| <b>OHC</b> | basal  | 95.3%*       | 48.6%^     | 105.8%*    | 102.4%* | 76.2%* | 41.7%^    |
|            | middle | 99.6%*       | 32.4%^     | 108.2%*    | 89.0%*  | 94.4%* | 44.7%^    |
|            | apical | 97.1%*       | 29.0%^     | 101.3%*    | 81.2%*^ | 94.8%* | 75.7%*^   |
| <b>SC</b>  | basal  | 99.0%*       | 44.1%^     | 103.4%*    | 85.6%*^ | 66.9%^ | 47.1%^    |
|            | middle | 97.6%*       | 40.3%^     | 102.8%*    | 88.7%*  | 80.7%* | 49.5%^    |
|            | apical | 88.0%*       | 28.4%^     | 94.0%*     | 83.3%   | 74.7%  | 70.9%*^   |

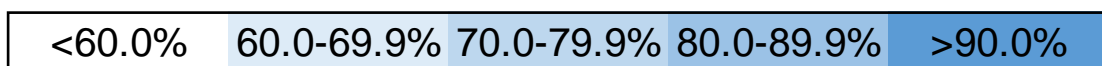

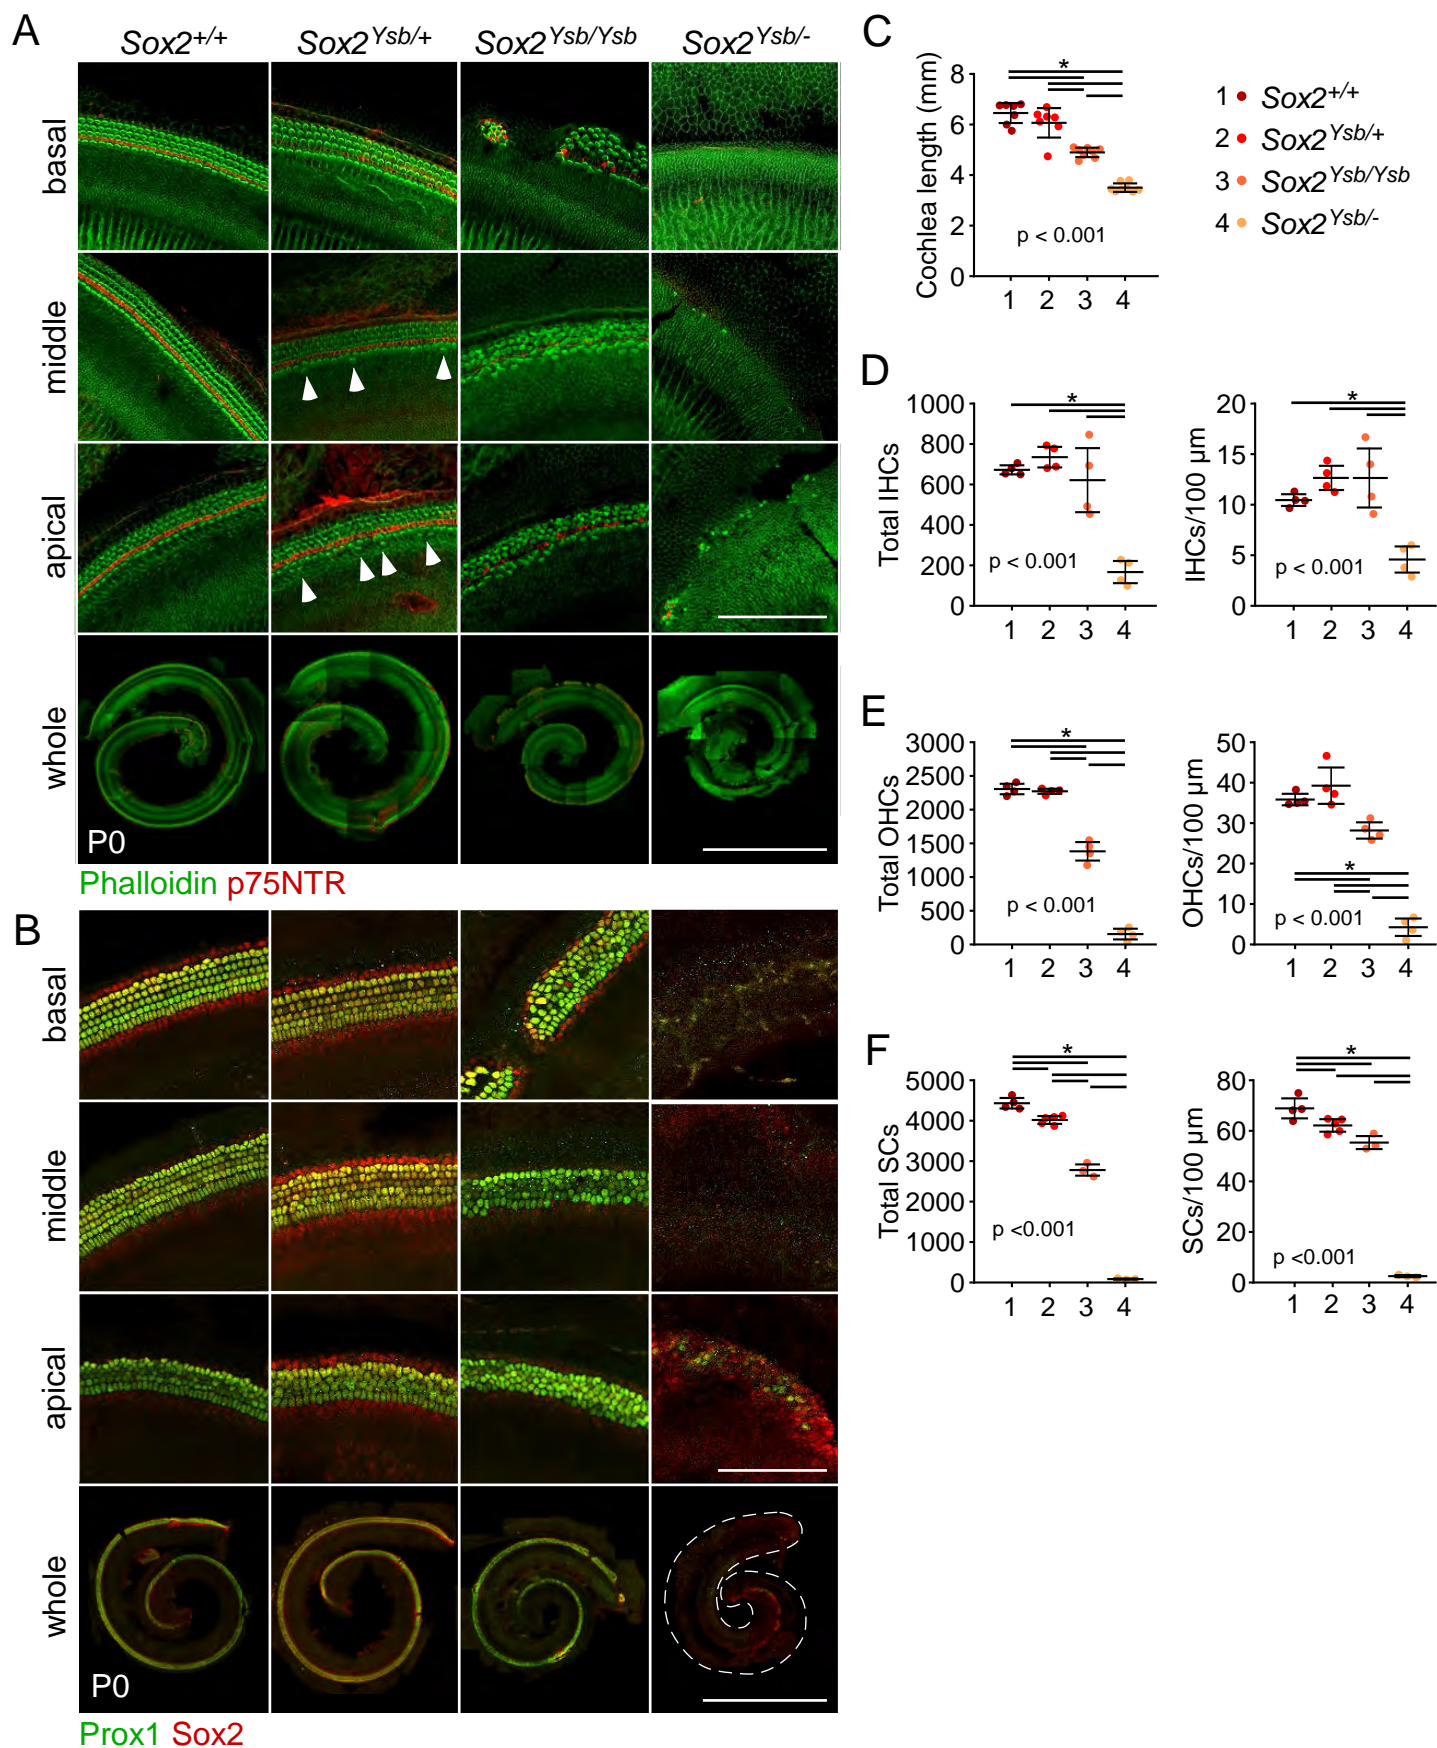



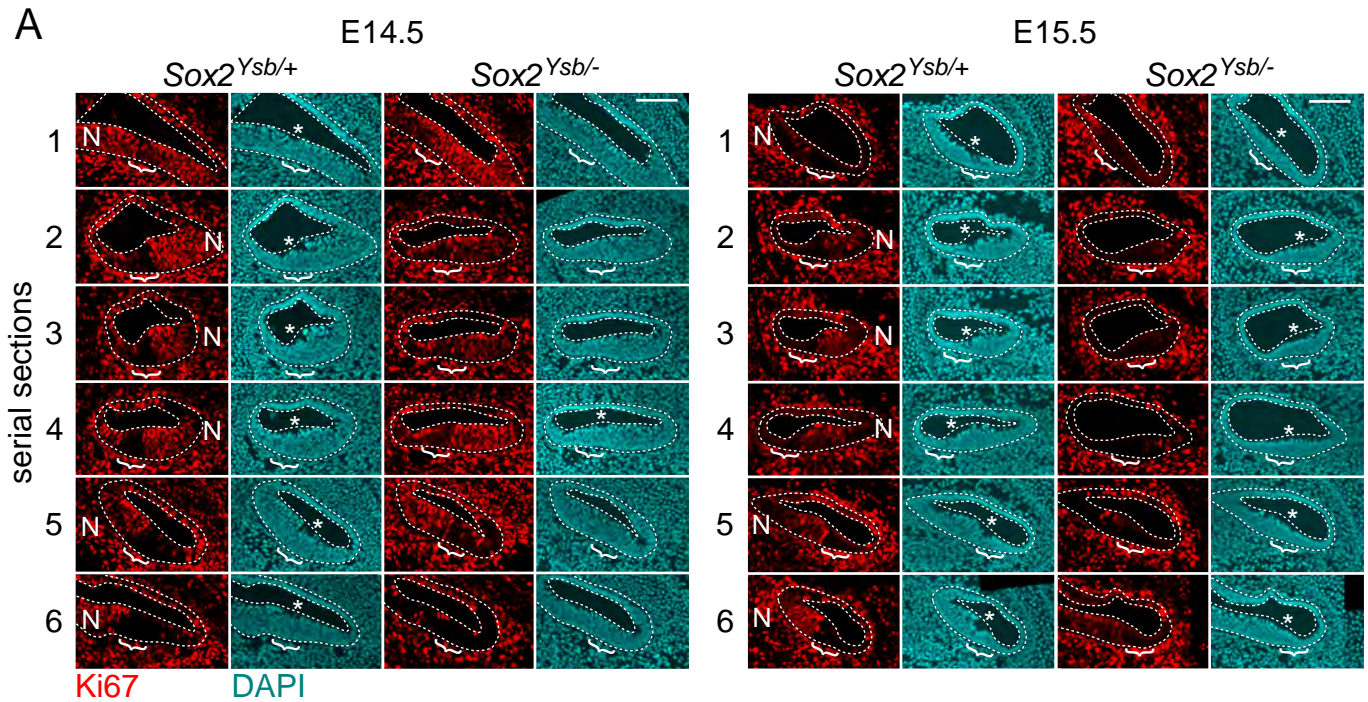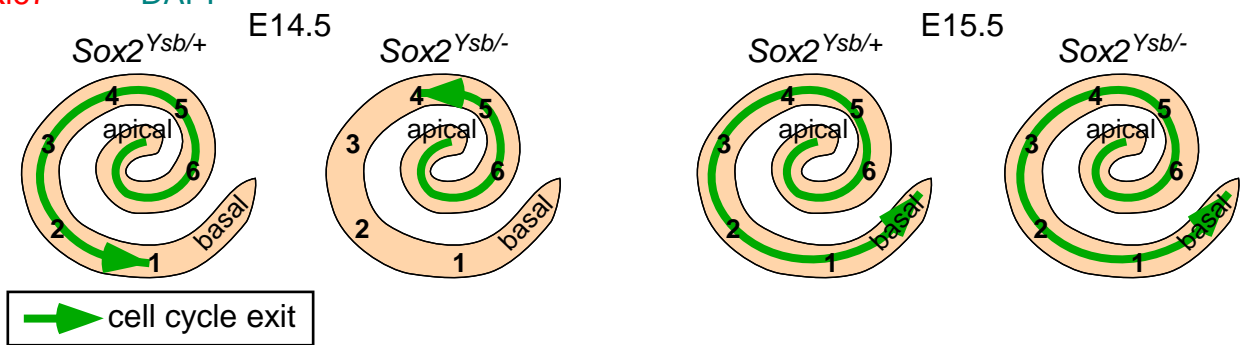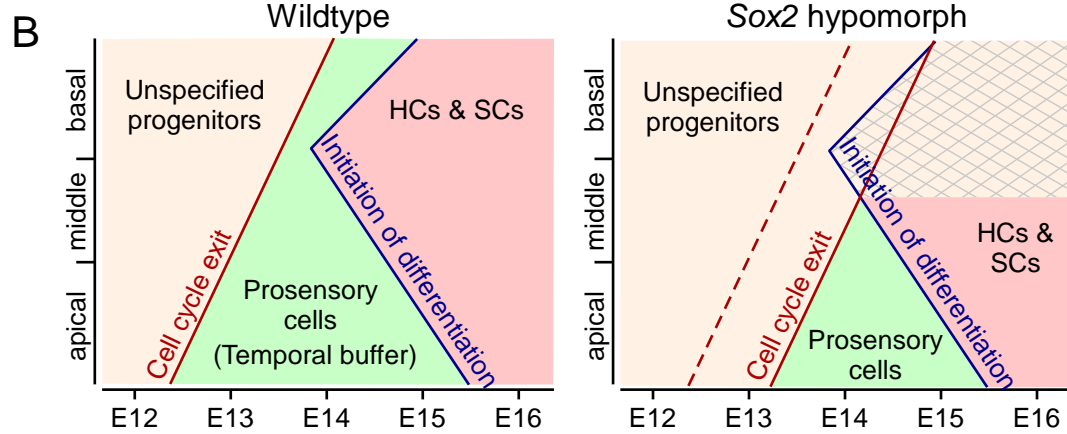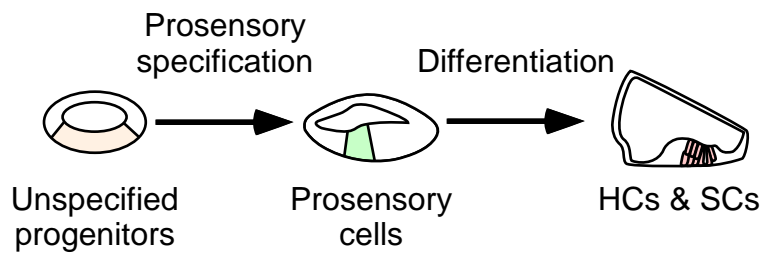

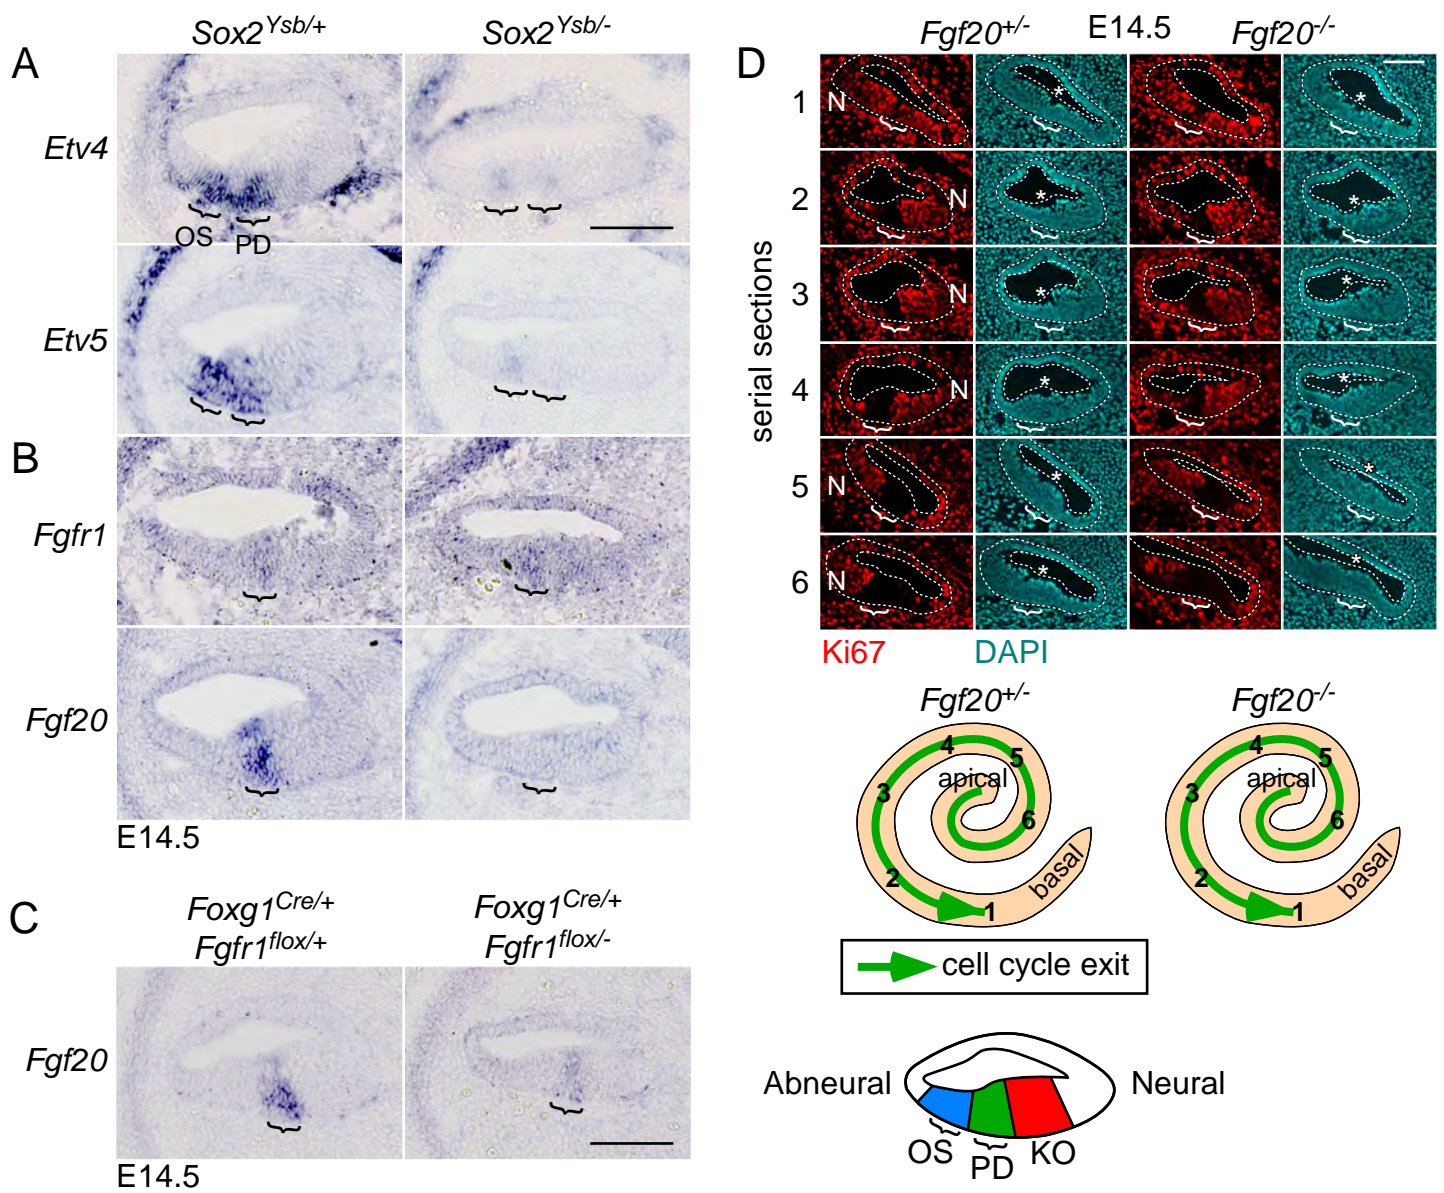

Fig 7

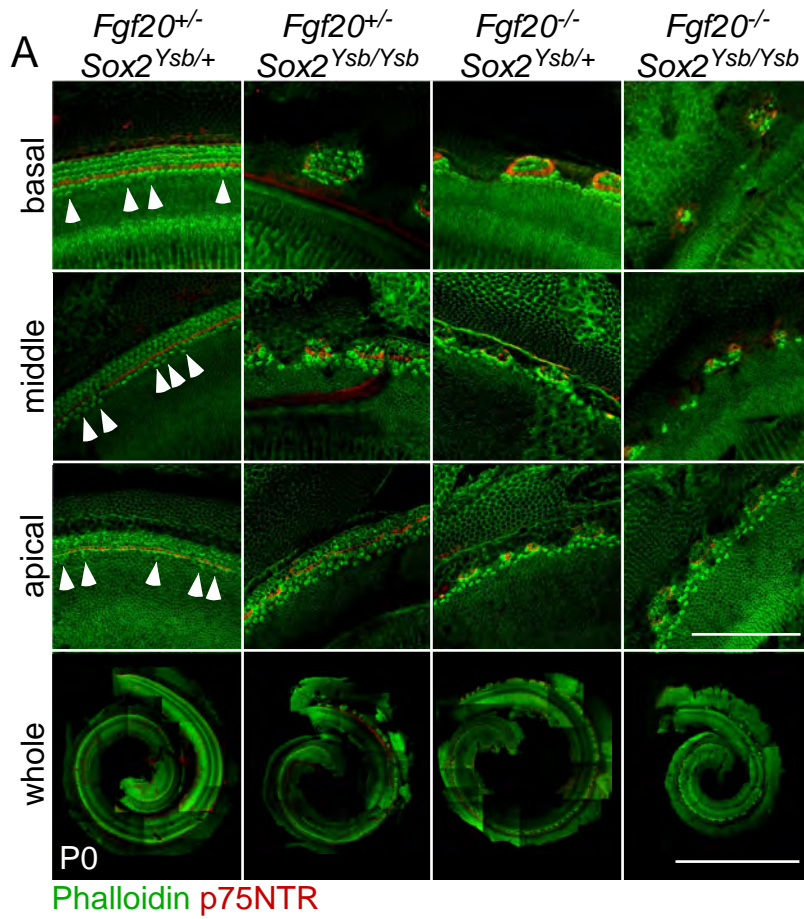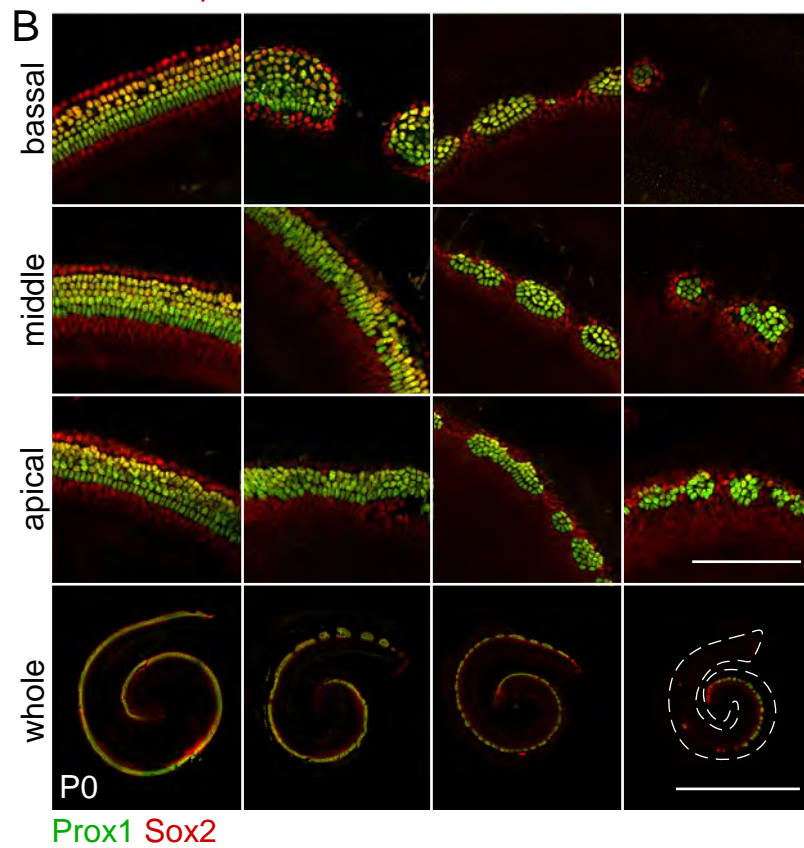

Fig 8

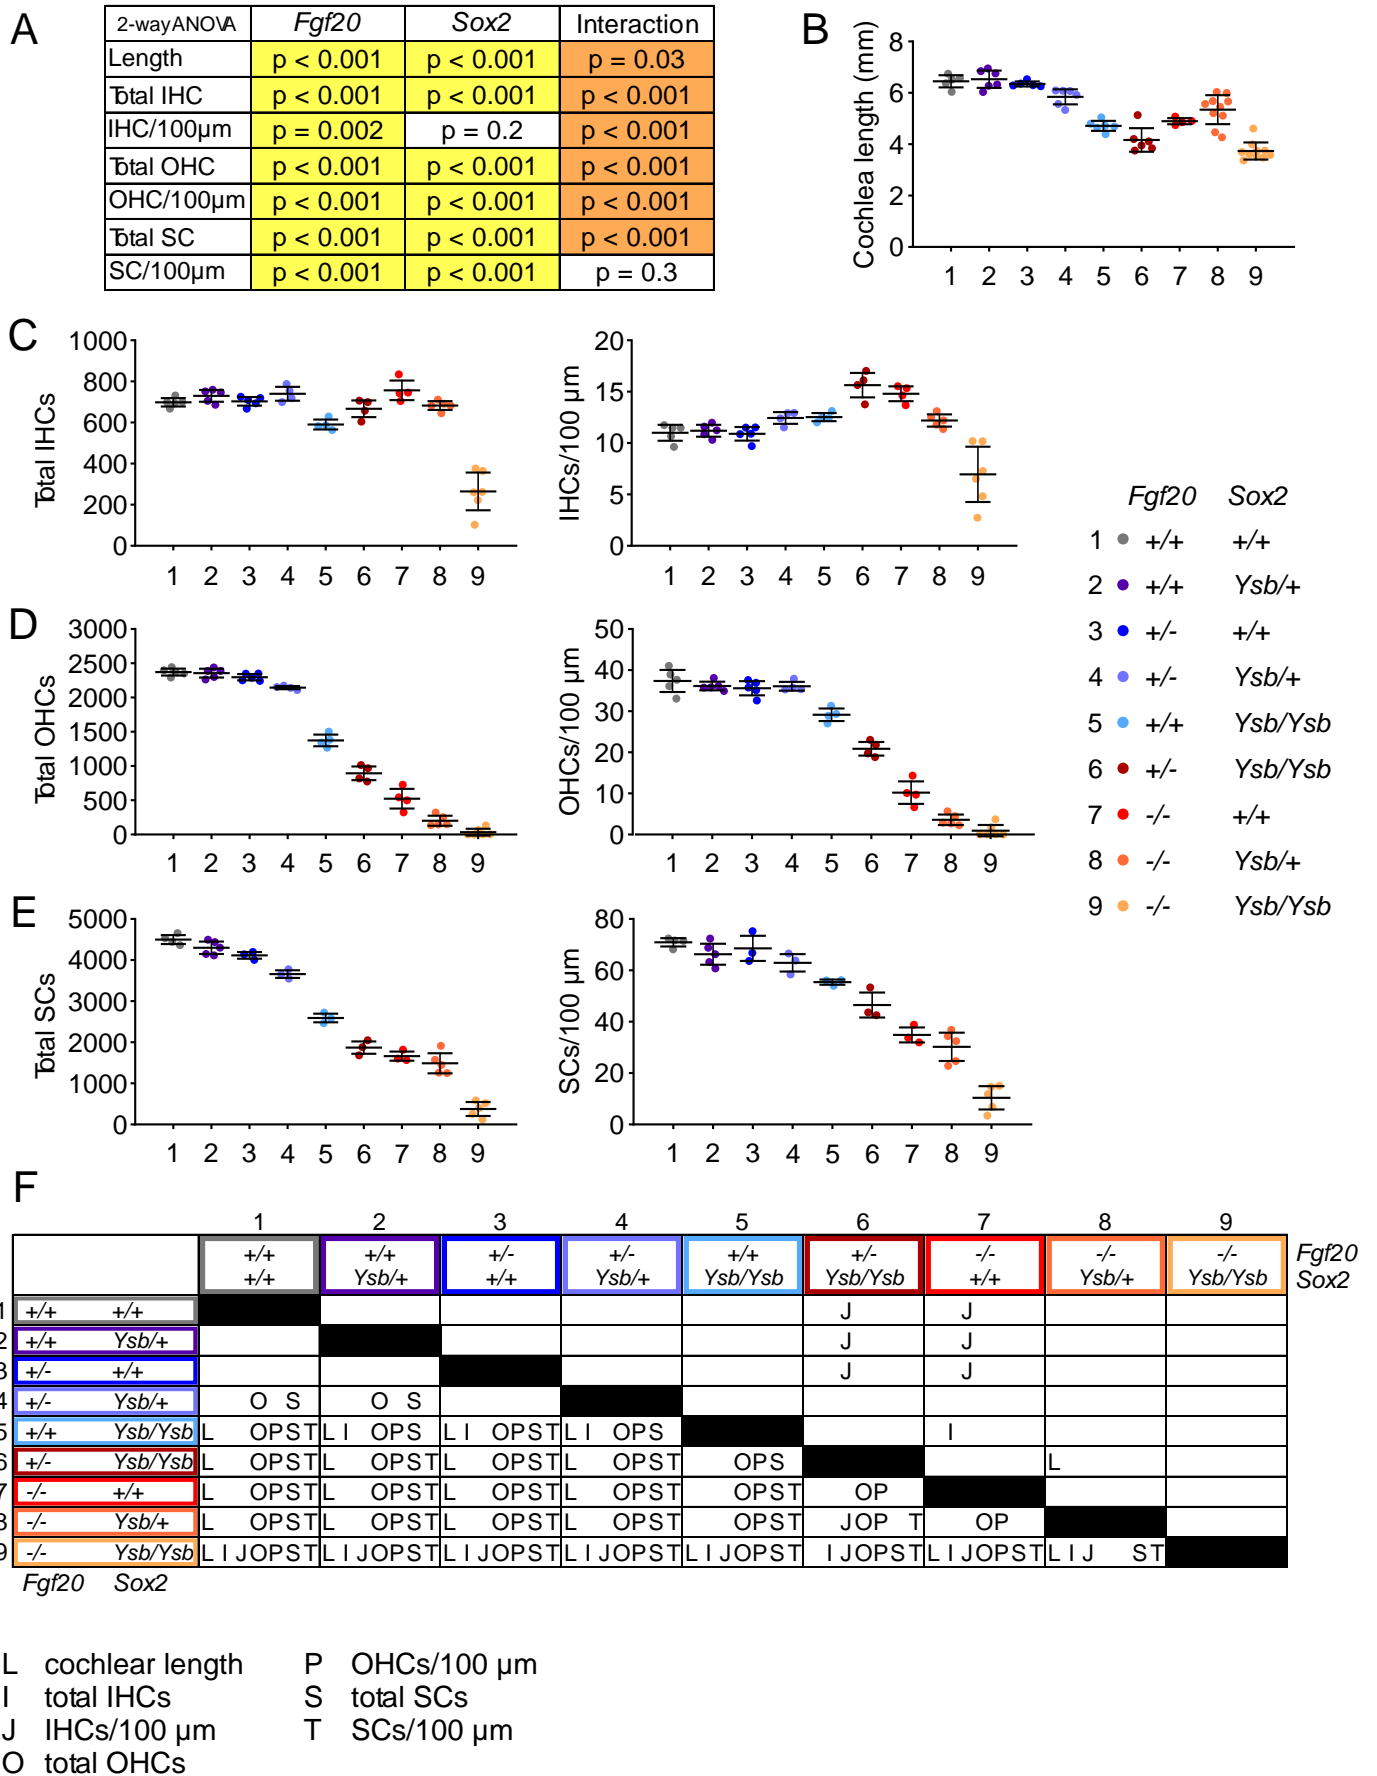

A

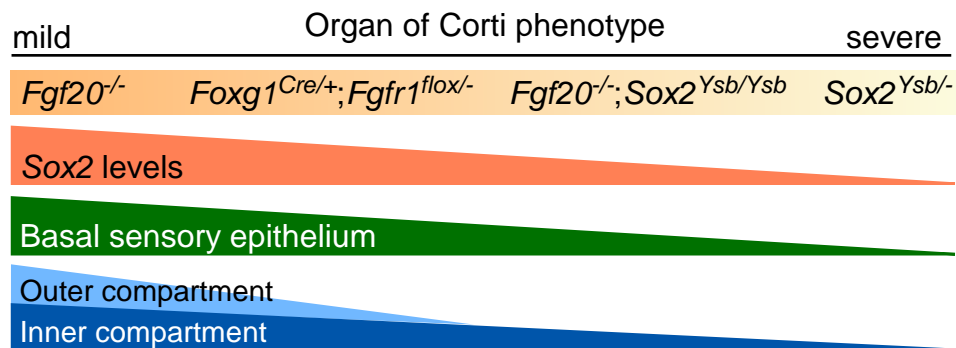

B

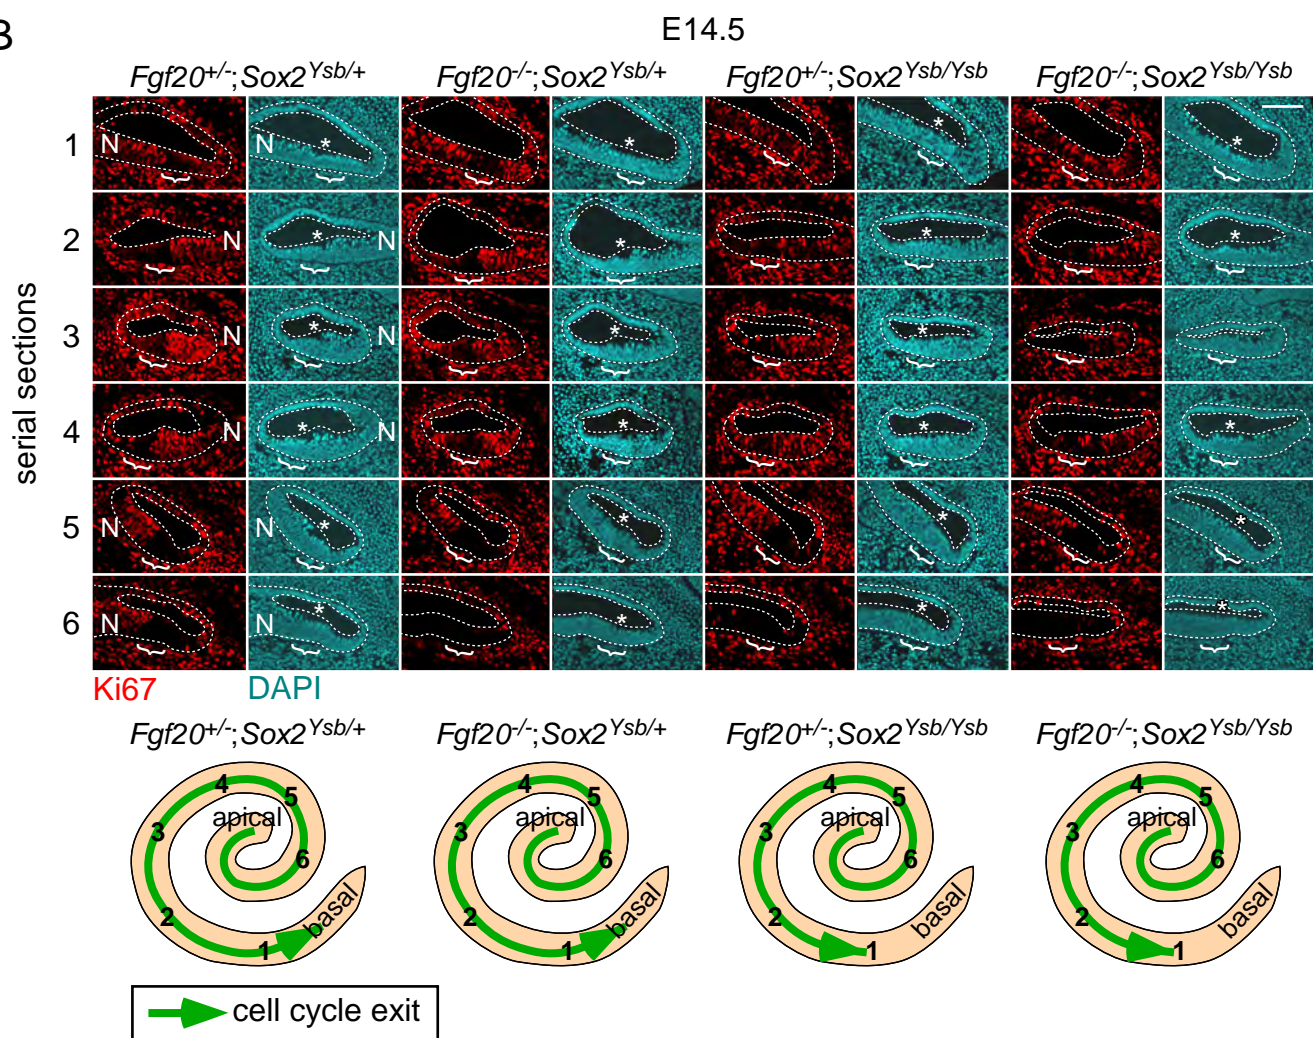

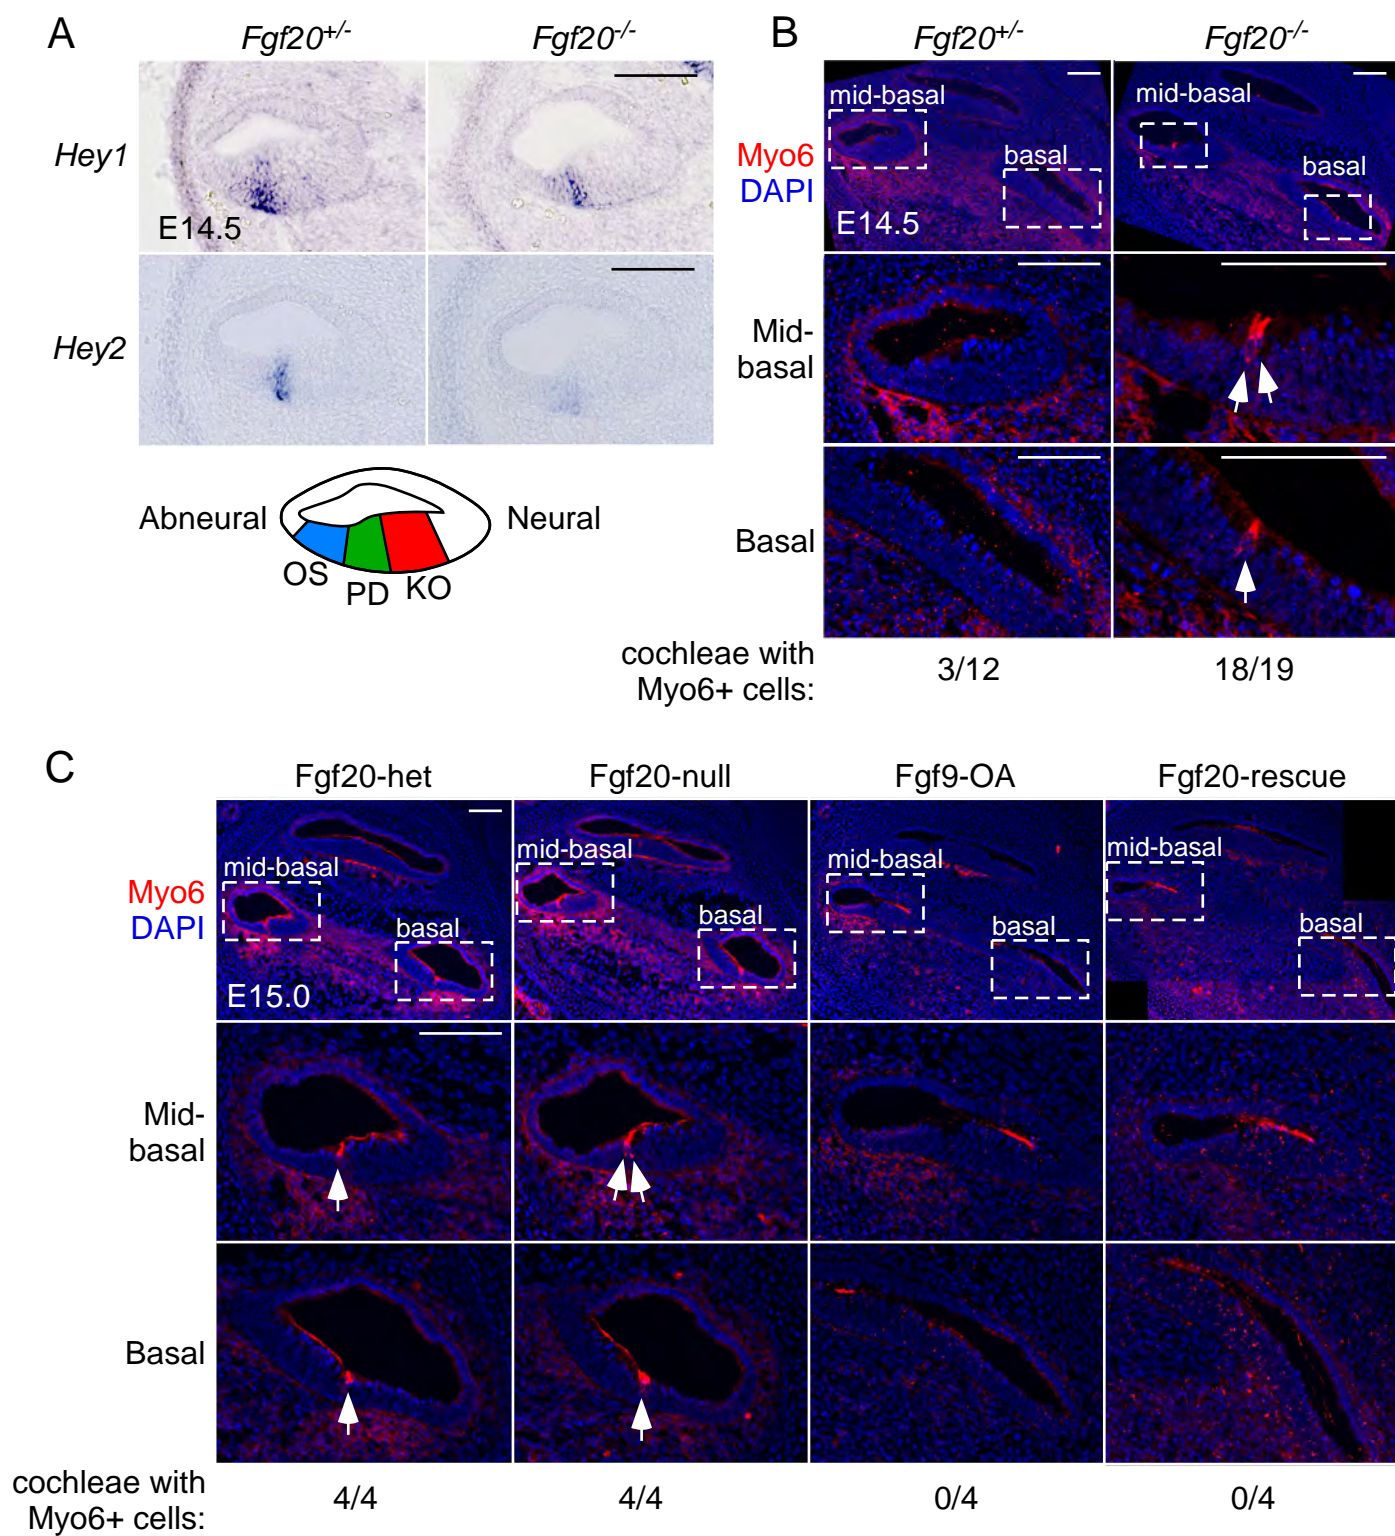

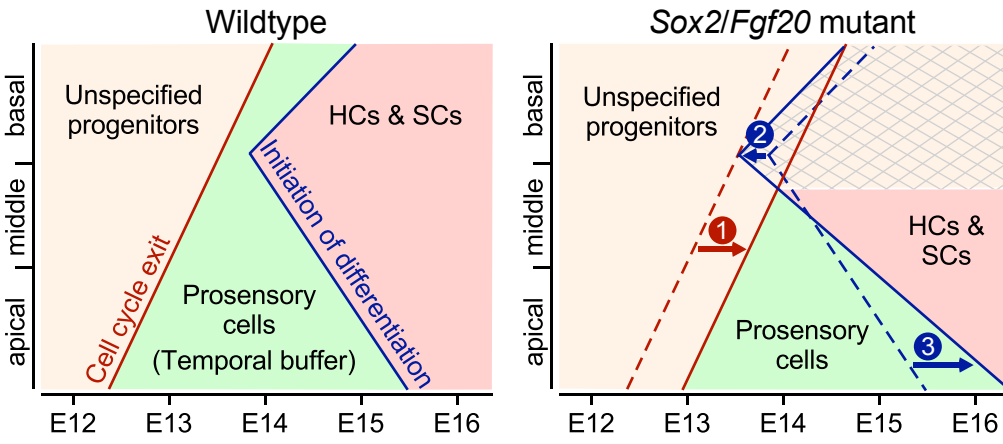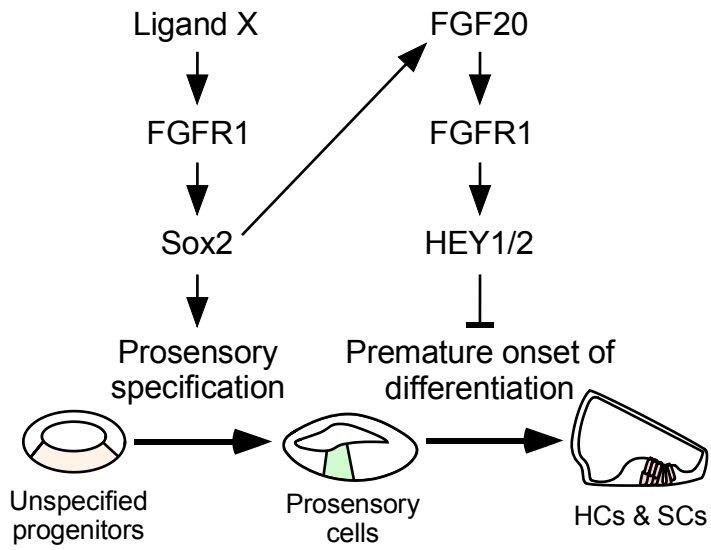

Source: https://www.biorxiv.org/content/10.1101/436790v3.full.pdf
